# Supplementary material for: An increase in reactive oxygen species underlies neonatal cerebellum repair
Source: eLife. 2025 Aug 12;14:RP102515. doi: 10.7554/eLife.102515 (PMC12342822; doi:10.7554/eLife.102515)
Supplement: Figure 1—source data 1. — pct1: % cells in a cluster that express the gene; pct2: % cells that express the gene outside the given cluster. [file elife-102515-fig1-data1.xlsx]

## Sheet: Table S2 Marker genes
Table S2. Markers genes used to identify cluster cell types.
Cluster	Cell identity	Markers
1	GCPs (proliferative)	Atoh1/mKi67
2	Hopx-NEPs	Hopx/Gdf10/Slc1a3
3	Hopx-NEPs	Hopx/Gdf10/Slc1a3
4	GCPs	Atoh1
5	Ascl1-NEPs	Ascl1/Ptf1a
6	Hopx-NEPs/Bg	Hopx/Gdf10
7	GCPs (postmitotic)	Tubb3/Barhl1
8	Ascl1-NEPs (proliferative)	Ascl1/Ptf1a/mKi67
9	Astrocytes	Slc6a11
10	Hopx-NEPs (proliferative)	Hopx/mKi67
11	Immature interneurons	Pax2
12	GCPs (proliferative)	Atoh1/mKi67
13	Ependymal cells	Foxj1
14	GCPs (proliferative)	Atoh1/mKi67
15	Oligodendrocyte progenitors	Olig2/Gpr17
16	Meninges	Col1a1/Vtn
17	Microglia	Csfr1
18	Ependymal cells	Foxj1
19	Ependymal cells	Foxj1
20	Low-quality cells	High percentage of mitochondrial reads
21	Microglia	Csfr1

## Sheet: Table S2 All genes by clust
Figure 1–source data 1. scRNA-seq all genes expressed by cluster (irradiated at P1 (IR; P2, P3, P5) or non-irradiated (nonIR; P1, P2, P3, P5).
	p_val	avg_log2FC	pct.1	pct.2	p_val_adj	cluster	gene
H1f5	0	2.1903	0.999	0.533	0	1	H1f5
H2ac8	0	1.89668	0.97	0.304	0	1	H2ac8
H4c4	0	1.67862	0.988	0.428	0	1	H4c4
Pclaf	0	1.5511	0.999	0.489	0	1	Pclaf
Selenom	0	1.52055	0.97	0.623	0	1	Selenom
Tyms	0	1.37292	0.978	0.459	0	1	Tyms
Top2a	0	1.37102	0.992	0.442	0	1	Top2a
Tbata	0	1.35024	0.788	0.213	0	1	Tbata
H1f1	0	1.3	0.858	0.214	0	1	H1f1
Hpca	0	1.26688	0.79	0.237	0	1	Hpca
Dut	0	1.26086	0.999	0.717	0	1	Dut
Sfrp1	0	1.24568	0.808	0.209	0	1	Sfrp1
Ppp2r2c	0	1.19605	0.935	0.274	0	1	Ppp2r2c
H1f4	0	1.1822	0.999	0.831	0	1	H1f4
Dek	0	1.17521	0.997	0.715	0	1	Dek
Smc2	0	1.16371	0.995	0.568	0	1	Smc2
Anp32b	0	1.14826	0.999	0.824	0	1	Anp32b
Insm1	0	1.14493	0.957	0.381	0	1	Insm1
Spc24	0	1.1183	0.991	0.511	0	1	Spc24
Tuba1b	0	1.09887	1	0.892	0	1	Tuba1b
Birc5	0	1.07787	0.989	0.487	0	1	Birc5
Slc29a1	0	1.05932	0.9	0.398	0	1	Slc29a1
Fbxo5	0	1.04103	0.915	0.279	0	1	Fbxo5
Mki67	0	1.03951	0.957	0.413	0	1	Mki67
Siva1	0	1.02343	0.994	0.737	0	1	Siva1
Esco2	0	1.00457	0.872	0.224	0	1	Esco2
H2az1	0	0.98873	0.999	0.818	0	1	H2az1
H3c3	0	0.978248	0.742	0.136	0	1	H3c3
Csrp2	0	0.968551	0.951	0.452	0	1	Csrp2
Ptma	0	0.965785	1	0.988	0	1	Ptma
Aurkb	0	0.950793	0.92	0.301	0	1	Aurkb
Ybx3	0	0.944993	0.99	0.679	0	1	Ybx3
Cdk1	0	0.931039	0.984	0.469	0	1	Cdk1
Ranbp1	0	0.909461	1	0.933	0	1	Ranbp1
Rad51ap1	0	0.876174	0.856	0.275	0	1	Rad51ap1
Hprt	0	0.856428	0.91	0.387	0	1	Hprt
H2ac10	0	0.842737	0.664	0.11	0	1	H2ac10
H3c6	0	0.836509	0.763	0.216	0	1	H3c6
Npm1	0	0.834395	1	0.992	0	1	Npm1
Nrn1	0	0.824142	0.712	0.201	0	1	Nrn1
Mxd3	0	0.819067	0.867	0.318	0	1	Mxd3
Hmgb1	0	0.815435	1	0.949	0	1	Hmgb1
Kif11	0	0.80832	0.839	0.281	0	1	Kif11
Pcsk9	0	0.752557	0.647	0.162	0	1	Pcsk9
Cited1	0	0.747974	0.687	0.18	0	1	Cited1
H4c8	0	0.733184	0.694	0.182	0	1	H4c8
Srsf3	0	0.719078	1	0.974	0	1	Srsf3
Eif5a	0	0.677936	1	0.986	0	1	Eif5a
Rpl22	0	0.661638	0.999	0.979	0	1	Rpl22
Rps16	0	0.653891	1	0.991	0	1	Rps16
Rpsa	0	0.646077	1	0.998	0	1	Rpsa
Rplp2	0	0.623204	1	0.989	0	1	Rplp2
Rps5	0	0.600277	1	0.999	0	1	Rps5
Rps4x	0	0.598304	1	0.997	0	1	Rps4x
Rps11	0	0.564228	1	0.998	0	1	Rps11
H2bc13	0	0.511718	0.474	0.087	0	1	H2bc13
H2bc11	0	0.448594	0.458	0.081	0	1	H2bc11
Rpl14	1.39e-306	0.684328	0.999	0.971	7.89e-302	1	Rpl14
H2ac20	1.33e-305	0.542629	0.49	0.099	7.52e-301	1	H2ac20
Spc25	6.86e-303	0.822621	0.895	0.341	3.89e-298	1	Spc25
Ran	1.32e-301	0.714082	1	0.966	7.48e-297	1	Ran
Snrpf	2e-301	0.773062	0.998	0.849	1.13e-296	1	Snrpf
Map3k1	2.94e-298	0.785334	0.802	0.28	1.67e-293	1	Map3k1
Ska1	8.44e-298	0.666773	0.77	0.251	4.79e-293	1	Ska1
Fkbp3	1.05e-294	0.705181	1	0.926	5.94e-290	1	Fkbp3
Sgo1	7.9e-294	0.763696	0.816	0.294	4.48e-289	1	Sgo1
Cks1b	3.54e-293	0.928931	0.992	0.64	2.01e-288	1	Cks1b
Rfc4	3.97e-293	0.874692	0.975	0.568	2.25e-288	1	Rfc4
Melk	1.33e-290	0.662877	0.752	0.248	7.53e-286	1	Melk
Hmgb2	1.4e-290	0.999098	1	0.818	7.97e-286	1	Hmgb2
Ccna2	2.28e-290	0.836796	0.95	0.402	1.29e-285	1	Ccna2
Gm2694	2.22e-288	0.636261	0.778	0.243	1.26e-283	1	Gm2694
Nusap1	1.19e-285	0.808575	0.9	0.327	6.74e-281	1	Nusap1
H2ax	3.29e-283	0.950059	0.997	0.697	1.87e-278	1	H2ax
Smc4	3.98e-282	0.882856	0.97	0.514	2.26e-277	1	Smc4
Rps27a	1.39e-281	0.497649	1	0.998	7.87e-277	1	Rps27a
Dctpp1	1.65e-280	0.843071	0.997	0.741	9.35e-276	1	Dctpp1
Atoh1	1.16e-278	0.568334	0.441	0.088	6.6e-274	1	Atoh1
Abracl	2.23e-278	0.920793	0.977	0.637	1.27e-273	1	Abracl
H1f3	2.39e-278	0.815868	0.869	0.348	1.36e-273	1	H1f3
Atad2	7.44e-277	0.816627	0.795	0.302	4.22e-272	1	Atad2
Cdca5	9.35e-276	0.522803	0.574	0.15	5.31e-271	1	Cdca5
Nt5dc2	3.36e-271	0.877828	0.989	0.694	1.91e-266	1	Nt5dc2
Barhl1	5.81e-270	0.829699	0.634	0.186	3.29e-265	1	Barhl1
Snrpg	6e-269	0.670324	0.999	0.911	3.4e-264	1	Snrpg
H2bc14	4.3e-268	0.509968	0.483	0.109	2.44e-263	1	H2bc14
Prc1	5.02e-268	0.785758	0.901	0.365	2.85e-263	1	Prc1
H2bc15	5.22e-267	0.402772	0.387	0.069	2.96e-262	1	H2bc15
Knl1	1.15e-266	0.749494	0.804	0.301	6.5e-262	1	Knl1
Pgf	1.25e-266	0.543384	0.471	0.106	7.1e-262	1	Pgf
Pa2g4	2.56e-264	0.726246	0.997	0.847	1.46e-259	1	Pa2g4
Rps13	1.06e-263	0.490776	1	0.996	6.04e-259	1	Rps13
Lyar	2.08e-262	0.789934	0.941	0.517	1.18e-257	1	Lyar
Rps20	2.5e-262	0.5398	1	0.999	1.42e-257	1	Rps20
Ybx1	1.83e-261	0.513411	1	0.995	1.04e-256	1	Ybx1
Homer2	1.7e-260	0.644559	0.772	0.278	9.66e-256	1	Homer2
Incenp	2.87e-260	0.716279	0.817	0.309	1.63e-255	1	Incenp
Uncx	2.81e-258	0.493543	0.625	0.174	1.59e-253	1	Uncx
H3c11	9.95e-258	0.456756	0.456	0.099	5.65e-253	1	H3c11
Alyref	1.01e-254	0.719289	0.998	0.841	5.72e-250	1	Alyref
Ntng1	5.4e-254	0.460069	0.382	0.072	3.06e-249	1	Ntng1
Hs3st5	1.67e-252	0.353937	0.369	0.066	9.49e-248	1	Hs3st5
Rpl21	2.9e-252	0.566584	1	0.992	1.65e-247	1	Rpl21
Tlx3	1.08e-251	1.20804	0.52	0.143	6.16e-247	1	Tlx3
Tk1	1.67e-251	0.56536	0.594	0.172	9.47e-247	1	Tk1
Nxph3	4.09e-250	0.431447	0.401	0.081	2.32e-245	1	Nxph3
H2ac22	4.8e-250	0.381748	0.35	0.06	2.73e-245	1	H2ac22
Prim1	1.51e-248	0.732486	0.856	0.38	8.6e-244	1	Prim1
Rpl3	2.38e-248	0.473987	1	0.997	1.35e-243	1	Rpl3
Hnrnpd	9.5e-247	0.676764	0.998	0.892	5.39e-242	1	Hnrnpd
Anp32a	6.61e-246	0.667428	1	0.903	3.75e-241	1	Anp32a
Hmgn2	1.05e-245	0.808982	0.979	0.629	5.93e-241	1	Hmgn2
Hirip3	1.39e-244	0.75712	0.862	0.395	7.9e-240	1	Hirip3
Hmgn1	3.39e-244	0.590695	1	0.977	1.93e-239	1	Hmgn1
Rpl41	9.63e-244	0.466352	1	0.999	5.47e-239	1	Rpl41
Ndc80	3.09e-243	0.566229	0.633	0.198	1.76e-238	1	Ndc80
Ncl	1.35e-242	0.64903	1	0.963	7.63e-238	1	Ncl
Gsdmd	3.11e-241	0.502683	0.468	0.112	1.77e-236	1	Gsdmd
Sphkap	6.29e-241	0.471059	0.529	0.138	3.57e-236	1	Sphkap
Rpl19	6.15e-240	0.459488	1	0.997	3.49e-235	1	Rpl19
Rnd3	1.41e-239	0.827136	0.925	0.487	7.99e-235	1	Rnd3
Rpl4	2.58e-238	0.601248	1	0.95	1.46e-233	1	Rpl4
H3f3b	4.59e-238	0.597838	1	0.999	2.6e-233	1	H3f3b
Rrm2	4.92e-238	0.841871	0.945	0.478	2.79e-233	1	Rrm2
Rpl32	2.67e-236	0.473801	1	0.998	1.51e-231	1	Rpl32
Rps3a1	2.71e-236	0.471068	1	0.998	1.54e-231	1	Rps3a1
Usp1	2.09e-232	0.747661	0.944	0.521	1.19e-227	1	Usp1
Hnrnpab	2.66e-232	0.691233	0.999	0.92	1.51e-227	1	Hnrnpab
Rprml	3.42e-232	0.562461	0.329	0.058	1.94e-227	1	Rprml
Asf1b	3.91e-230	0.5047	0.589	0.179	2.22e-225	1	Asf1b
Rps17	2.26e-229	0.553922	1	0.965	1.28e-224	1	Rps17
Gsg1l	2.53e-228	0.547049	0.606	0.187	1.43e-223	1	Gsg1l
Rps8	4.19e-228	0.49881	1	0.994	2.38e-223	1	Rps8
Crispld1	1.35e-226	0.331153	0.318	0.054	7.64e-222	1	Crispld1
Rplp0	1.08e-225	0.568709	1	0.993	6.13e-221	1	Rplp0
Snrpe	6.09e-225	0.517245	0.999	0.972	3.46e-220	1	Snrpe
Rps2	1e-224	0.546208	1	0.993	5.69e-220	1	Rps2
Otx2	1.69e-224	0.671203	0.436	0.105	9.6e-220	1	Otx2
Tmpo	1.02e-223	0.741928	0.986	0.666	5.79e-219	1	Tmpo
Rpl28	1.77e-223	0.488628	1	0.993	1e-218	1	Rpl28
Snrpd1	3.45e-223	0.624597	0.998	0.859	1.96e-218	1	Snrpd1
Fau	5.66e-223	0.425306	1	0.998	3.21e-218	1	Fau
Pbk	4.49e-222	0.660186	0.935	0.43	2.55e-217	1	Pbk
Plk4	5.91e-221	0.557918	0.691	0.246	3.35e-216	1	Plk4
Smco4	1.09e-218	0.625952	0.735	0.297	6.18e-214	1	Smco4
Ppia	3.06e-218	0.548231	1	0.954	1.74e-213	1	Ppia
Dnmt1	1.55e-216	0.695778	0.907	0.472	8.78e-212	1	Dnmt1
Crmp1	3.7e-216	0.851144	0.778	0.33	2.1e-211	1	Crmp1
Gmnn	4.23e-216	0.677047	0.901	0.434	2.4e-211	1	Gmnn
Rpl18	6.42e-216	0.473106	1	0.992	3.64e-211	1	Rpl18
Bex1	5.08e-215	0.846682	0.928	0.582	2.89e-210	1	Bex1
Rps23	5.24e-215	0.488511	1	0.991	2.97e-210	1	Rps23
Nasp	2.7e-214	0.712369	0.999	0.806	1.53e-209	1	Nasp
Snrnp40	3.2e-214	0.670485	0.966	0.685	1.81e-209	1	Snrnp40
Rps19	4.96e-213	0.45725	1	0.997	2.81e-208	1	Rps19
Pola1	8.3e-213	0.540648	0.639	0.218	4.71e-208	1	Pola1
Rps21	2.86e-211	0.498308	1	0.993	1.62e-206	1	Rps21
Aurka	3e-210	0.586442	0.634	0.215	1.7e-205	1	Aurka
Rps7	2.9e-209	0.480844	1	0.989	1.64e-204	1	Rps7
Col9a1	8.97e-209	0.487742	0.499	0.141	5.09e-204	1	Col9a1
H1f0	2.2e-208	0.894337	0.979	0.796	1.25e-203	1	H1f0
Cadps2	3.22e-208	0.427836	0.432	0.107	1.82e-203	1	Cadps2
Cenpv	3.34e-208	0.681182	0.987	0.711	1.9e-203	1	Cenpv
Rpl8	5.63e-208	0.409635	1	0.998	3.19e-203	1	Rpl8
Mis18bp1	8.43e-207	0.532346	0.669	0.234	4.78e-202	1	Mis18bp1
Rps26	7.56e-206	0.476133	1	0.993	4.29e-201	1	Rps26
Dnajc21	1.41e-205	0.627738	0.788	0.347	8.02e-201	1	Dnajc21
H2bc6	2.5e-205	0.336473	0.36	0.076	1.42e-200	1	H2bc6
Tmsb10	5.24e-205	0.634951	1	0.955	2.98e-200	1	Tmsb10
Rps24	2.41e-204	0.529175	1	0.998	1.37e-199	1	Rps24
Hnrnpdl	3.16e-201	0.580217	0.998	0.935	1.79e-196	1	Hnrnpdl
Rpl9	1.16e-200	0.392792	1	0.998	6.6e-196	1	Rpl9
H2bc3	1.17e-200	0.303215	0.321	0.061	6.63e-196	1	H2bc3
Lbr	6.82e-200	0.588887	0.703	0.275	3.87e-195	1	Lbr
Myod1	4.77e-199	0.399933	0.232	0.032	2.71e-194	1	Myod1
Rps29	6.84e-199	0.428427	1	0.995	3.88e-194	1	Rps29
Snrpb	3.43e-198	0.500423	1	0.959	1.95e-193	1	Snrpb
Plxnb2	3.97e-198	0.737742	0.926	0.544	2.25e-193	1	Plxnb2
Shcbp1	6.36e-198	0.532681	0.698	0.265	3.61e-193	1	Shcbp1
Tubb5	1.03e-197	0.611673	1	0.974	5.84e-193	1	Tubb5
Nap1l1	3.01e-197	0.596045	0.998	0.876	1.71e-192	1	Nap1l1
Ppp1r14a	8.75e-197	0.51183	0.468	0.131	4.97e-192	1	Ppp1r14a
Ncapg	1.17e-196	0.468029	0.586	0.194	6.67e-192	1	Ncapg
Hk2	1.31e-196	0.51481	0.595	0.2	7.43e-192	1	Hk2
Anln	1.29e-195	0.420765	0.492	0.143	7.3e-191	1	Anln
Sema7a	1.76e-195	0.356369	0.371	0.084	1e-190	1	Sema7a
Supt16	2.68e-195	0.67428	0.984	0.75	1.52e-190	1	Supt16
Cenpm	2.91e-195	0.661633	0.959	0.529	1.65e-190	1	Cenpm
Bub1	1.64e-194	0.524854	0.682	0.255	9.33e-190	1	Bub1
Srsf7	3.19e-194	0.57189	1	0.924	1.81e-189	1	Srsf7
E2f7	3.37e-193	0.334098	0.394	0.094	1.91e-188	1	E2f7
Serbp1	4.47e-193	0.530144	1	0.946	2.54e-188	1	Serbp1
Elavl2	2.46e-192	0.539591	0.746	0.29	1.39e-187	1	Elavl2
Rbbp4	4.39e-191	0.593992	0.997	0.848	2.49e-186	1	Rbbp4
Rfc5	5.64e-191	0.582008	0.811	0.371	3.2e-186	1	Rfc5
Mfap4	4.92e-189	0.834375	0.864	0.451	2.79e-184	1	Mfap4
H3c7	7.78e-189	0.291257	0.295	0.055	4.41e-184	1	H3c7
Cks2	2.1e-188	0.637146	0.827	0.362	1.19e-183	1	Cks2
Cdca8	1.01e-187	0.668039	0.968	0.492	5.75e-183	1	Cdca8
Rpl18a	1.37e-187	0.433888	1	0.998	7.8e-183	1	Rpl18a
Sult4a1	1.48e-187	0.438203	0.534	0.164	8.4e-183	1	Sult4a1
Cenpu	1.93e-187	0.433748	0.569	0.189	1.09e-182	1	Cenpu
Kif15	4.31e-187	0.535718	0.697	0.274	2.44e-182	1	Kif15
Hsd11b2	8.03e-186	0.423018	0.416	0.109	4.56e-181	1	Hsd11b2
Bok	2.17e-185	0.750586	0.889	0.484	1.23e-180	1	Bok
Rps25	3.13e-185	0.581591	0.994	0.852	1.78e-180	1	Rps25
Pkm	6.6e-185	0.590262	0.997	0.927	3.75e-180	1	Pkm
Lap3	1.03e-184	0.745601	0.868	0.499	5.83e-180	1	Lap3
Neil3	1.4e-184	0.427618	0.49	0.148	7.92e-180	1	Neil3
Barhl2	1.92e-184	0.334302	0.337	0.074	1.09e-179	1	Barhl2
H2af-ps2	3.47e-184	0.393028	0.493	0.144	1.97e-179	1	H2af-ps2
Mdga1	4.99e-184	0.44716	0.621	0.216	2.83e-179	1	Mdga1
Siah1b	4.99e-184	0.44668	0.602	0.211	2.83e-179	1	Siah1b
Kctd8	3.22e-183	0.337867	0.325	0.07	1.83e-178	1	Kctd8
Osbp2	9.06e-183	0.315263	0.324	0.07	5.14e-178	1	Osbp2
Rpl10a	1.38e-182	0.478579	1	0.986	7.82e-178	1	Rpl10a
Calm2	2.11e-182	0.585733	1	0.947	1.2e-177	1	Calm2
Dnajc9	2.29e-182	0.617274	0.987	0.703	1.3e-177	1	Dnajc9
Rps14	3.32e-182	0.424079	1	0.991	1.89e-177	1	Rps14
Mis18a	9.13e-182	0.440066	0.606	0.215	5.18e-177	1	Mis18a
Ccp110	2.43e-180	0.533855	0.655	0.251	1.38e-175	1	Ccp110
Spdl1	7.89e-180	0.38074	0.423	0.117	4.48e-175	1	Spdl1
Lsm3	1.28e-179	0.608684	0.953	0.611	7.29e-175	1	Lsm3
Tceal9	1.36e-179	0.56785	0.995	0.882	7.71e-175	1	Tceal9
Fen1	2.91e-179	0.523997	0.786	0.342	1.65e-174	1	Fen1
Bub3	3.18e-179	0.652809	0.961	0.682	1.8e-174	1	Bub3
Cenph	3.62e-179	0.472023	0.72	0.289	2.06e-174	1	Cenph
Cenpp	5.97e-179	0.535196	0.742	0.316	3.39e-174	1	Cenpp
Mab21l1	8.95e-179	0.360753	0.462	0.132	5.08e-174	1	Mab21l1
Kif4	9.01e-179	0.504013	0.689	0.265	5.11e-174	1	Kif4
Rpl13	1.49e-178	0.389216	1	0.998	8.48e-174	1	Rpl13
Ppa1	4.96e-178	0.600176	0.981	0.765	2.82e-173	1	Ppa1
Lig1	4.88e-177	0.595606	0.784	0.352	2.77e-172	1	Lig1
Rplp1	2.83e-176	0.442597	1	0.987	1.6e-171	1	Rplp1
Hmmr	4.22e-176	0.506433	0.698	0.266	2.39e-171	1	Hmmr
Tshz2	1.15e-175	0.459137	0.54	0.181	6.54e-171	1	Tshz2
Apbb1ip	4.26e-175	0.310119	0.271	0.051	2.42e-170	1	Apbb1ip
Rps27	7.59e-175	0.419699	1	0.992	4.31e-170	1	Rps27
Tpx2	1.74e-173	0.61414	0.912	0.436	9.88e-169	1	Tpx2
Mrpl18	1.88e-173	0.597547	0.983	0.764	1.07e-168	1	Mrpl18
Ercc6l	2.72e-173	0.327057	0.391	0.103	1.54e-168	1	Ercc6l
Lsm2	3.92e-173	0.595201	0.982	0.708	2.22e-168	1	Lsm2
Cdca3	1.08e-172	0.58762	0.877	0.411	6.15e-168	1	Cdca3
Pdlim1	1.78e-172	0.395837	0.491	0.153	1.01e-167	1	Pdlim1
H1f10	6.81e-172	0.718156	0.997	0.865	3.87e-167	1	H1f10
Rnaseh2a	6.97e-172	0.58849	0.849	0.432	3.95e-167	1	Rnaseh2a
Chrd	1.17e-171	0.308753	0.332	0.076	6.67e-167	1	Chrd
Kif22	6.35e-171	0.505078	0.724	0.29	3.6e-166	1	Kif22
Brca1	7.53e-171	0.470634	0.573	0.206	4.27e-166	1	Brca1
Cenpw	3.81e-169	0.574894	0.89	0.453	2.16e-164	1	Cenpw
Clspn	5.46e-169	0.529786	0.647	0.257	3.1e-164	1	Clspn
C1ql1	5.52e-169	0.42063	0.486	0.155	3.13e-164	1	C1ql1
Ncaph	6.06e-169	0.456378	0.615	0.231	3.44e-164	1	Ncaph
E2f1	6.09e-169	0.542853	0.875	0.419	3.46e-164	1	E2f1
Kcnk1	1.2e-168	0.350293	0.504	0.157	6.81e-164	1	Kcnk1
Pmf1	7.69e-168	0.556657	0.835	0.41	4.37e-163	1	Pmf1
Lhx1	3.95e-167	0.497375	0.666	0.256	2.24e-162	1	Lhx1
Haspin	5.47e-167	0.304904	0.341	0.083	3.11e-162	1	Haspin
Lockd	6.05e-167	0.573528	0.775	0.345	3.43e-162	1	Lockd
Ngfr	1.53e-166	0.343875	0.355	0.089	8.68e-162	1	Ngfr
Ebf3	2.98e-166	0.347644	0.531	0.171	1.69e-161	1	Ebf3
Rcc2	4.25e-166	0.623158	0.94	0.627	2.41e-161	1	Rcc2
Cox5a	4.99e-166	0.433807	0.998	0.973	2.83e-161	1	Cox5a
Gm11541	6.29e-166	0.316528	0.334	0.079	3.57e-161	1	Gm11541
Dbf4	9.83e-166	0.513988	0.741	0.315	5.58e-161	1	Dbf4
Rps3	1.21e-165	0.428916	1	0.982	6.86e-161	1	Rps3
Angptl2	1.81e-165	0.288484	0.328	0.077	1.03e-160	1	Angptl2
Ncapd3	3.83e-165	0.528719	0.726	0.317	2.17e-160	1	Ncapd3
Fgf9	3.89e-165	0.280494	0.309	0.069	2.21e-160	1	Fgf9
Lrig3	5.12e-165	0.404518	0.457	0.14	2.91e-160	1	Lrig3
Cenpk	6.49e-164	0.42932	0.666	0.262	3.68e-159	1	Cenpk
Map1b	1.26e-163	0.41672	0.925	0.53	7.15e-159	1	Map1b
Trip13	1.51e-162	0.411932	0.607	0.227	8.55e-158	1	Trip13
Hmgn5	1.71e-162	0.549463	0.818	0.4	9.72e-158	1	Hmgn5
Bex4	2.52e-161	0.643948	0.894	0.536	1.43e-156	1	Bex4
Prmt1	2.8e-161	0.512536	0.997	0.91	1.59e-156	1	Prmt1
Selenoh	2.98e-160	0.574595	0.998	0.785	1.69e-155	1	Selenoh
Tpt1	3.85e-160	0.388037	1	0.993	2.19e-155	1	Tpt1
Naca	9.29e-159	0.364667	1	0.997	5.27e-154	1	Naca
Smc6	1.37e-158	0.59154	0.967	0.668	7.8e-154	1	Smc6
Chaf1b	5.29e-158	0.536976	0.652	0.263	3e-153	1	Chaf1b
Magoh	1.1e-157	0.557951	0.965	0.72	6.23e-153	1	Magoh
Ccne1	1.33e-157	0.419938	0.514	0.173	7.54e-153	1	Ccne1
Pdap1	3.98e-157	0.488634	0.996	0.924	2.26e-152	1	Pdap1
Tmem178	9.54e-157	0.365864	0.549	0.188	5.42e-152	1	Tmem178
Rpl7	2.77e-156	0.476971	1	0.932	1.57e-151	1	Rpl7
Rps28	1.35e-154	0.447884	0.998	0.959	7.65e-150	1	Rps28
Fam210b	6.74e-153	0.500882	0.638	0.258	3.82e-148	1	Fam210b
Pcna	9.57e-153	0.592916	0.922	0.545	5.43e-148	1	Pcna
Set	1.93e-152	0.529022	0.99	0.85	1.1e-147	1	Set
Basp1	2.7e-152	0.295106	0.998	0.912	1.53e-147	1	Basp1
Rpl6	6.55e-152	0.451443	0.999	0.976	3.72e-147	1	Rpl6
Gse1	1.17e-151	0.486606	0.723	0.319	6.63e-147	1	Gse1
Nsmce4a	6.03e-151	0.538602	0.982	0.758	3.42e-146	1	Nsmce4a
Rfc1	1.84e-150	0.573583	0.877	0.513	1.05e-145	1	Rfc1
Rpl36a	2.94e-150	0.459526	0.999	0.972	1.67e-145	1	Rpl36a
Sms	5.46e-150	0.501347	0.768	0.362	3.1e-145	1	Sms
Cdca2	6.13e-150	0.347897	0.521	0.18	3.48e-145	1	Cdca2
Bex3	3.75e-149	0.4575	1	0.953	2.13e-144	1	Bex3
Rack1	5.71e-149	0.458811	0.997	0.946	3.24e-144	1	Rack1
Mad2l1	1.8e-148	0.45004	0.714	0.31	1.02e-143	1	Mad2l1
Cdca4	3.76e-148	0.380318	0.526	0.189	2.14e-143	1	Cdca4
Nrm	4.41e-148	0.526271	0.823	0.417	2.5e-143	1	Nrm
Ctps	7.57e-148	0.453437	0.733	0.329	4.3e-143	1	Ctps
Bex2	1.04e-147	0.555246	0.997	0.835	5.92e-143	1	Bex2
Fut8	1.14e-147	0.476687	0.656	0.275	6.48e-143	1	Fut8
Car3	1.29e-147	0.399392	0.25	0.051	7.35e-143	1	Car3
Nop10	3.78e-147	0.536872	0.987	0.805	2.14e-142	1	Nop10
Exosc8	8.62e-147	0.53962	0.936	0.593	4.89e-142	1	Exosc8
Fzd2	8.98e-147	0.468702	0.652	0.273	5.1e-142	1	Fzd2
Tubg1	1.65e-146	0.537011	0.887	0.5	9.35e-142	1	Tubg1
Rps15a	1.71e-146	0.346555	1	0.997	9.68e-142	1	Rps15a
Smc3	3.5e-146	0.538968	0.981	0.764	1.99e-141	1	Smc3
Rpl30	3.86e-146	0.378882	1	0.988	2.19e-141	1	Rpl30
Macroh2a1	5.11e-146	0.440873	1	0.955	2.9e-141	1	Macroh2a1
Stmn3	5.75e-146	0.426425	0.966	0.592	3.26e-141	1	Stmn3
Lmnb1	5.94e-146	0.595849	0.994	0.749	3.37e-141	1	Lmnb1
Cdc45	4.22e-145	0.355175	0.54	0.195	2.4e-140	1	Cdc45
Rps12	6.47e-145	0.453765	1	0.956	3.67e-140	1	Rps12
Mcm6	1.57e-144	0.609341	0.895	0.512	8.93e-140	1	Mcm6
Ccne2	3.26e-144	0.498016	0.433	0.141	1.85e-139	1	Ccne2
Rpl11	7.05e-144	0.341084	1	0.999	4e-139	1	Rpl11
Gpr153	9.19e-144	0.291059	0.34	0.091	5.21e-139	1	Gpr153
Ccnd1	1e-143	0.868956	0.906	0.611	5.68e-139	1	Ccnd1
Fgf8	7.26e-143	0.425255	0.238	0.049	4.12e-138	1	Fgf8
Cdca7l	1.61e-142	0.323796	0.425	0.134	9.12e-138	1	Cdca7l
Gar1	2.6e-142	0.536773	0.842	0.479	1.47e-137	1	Gar1
Sapcd2	4.54e-142	0.391739	0.622	0.244	2.58e-137	1	Sapcd2
Klf13	5.1e-142	0.467745	0.716	0.319	2.89e-137	1	Klf13
Rpl39	9.52e-142	0.377166	1	0.995	5.4e-137	1	Rpl39
Arhgap11a	1.25e-141	0.441791	0.58	0.228	7.09e-137	1	Arhgap11a
Lrr1	1.91e-141	0.347204	0.504	0.178	1.09e-136	1	Lrr1
Ddah2	1.96e-141	0.489835	0.998	0.921	1.11e-136	1	Ddah2
Dnph1	6.37e-141	0.517912	0.867	0.486	3.62e-136	1	Dnph1
U2af1	3.02e-140	0.531618	0.966	0.721	1.72e-135	1	U2af1
Icmt	7.36e-140	0.260606	0.316	0.082	4.18e-135	1	Icmt
Tipin	2.17e-139	0.548437	0.947	0.631	1.23e-134	1	Tipin
Boc	2.75e-139	0.371769	0.557	0.209	1.56e-134	1	Boc
Rps15	1.05e-138	0.429018	1	0.946	5.93e-134	1	Rps15
Rpl31	5.26e-138	0.454682	0.996	0.919	2.99e-133	1	Rpl31
Nop58	1.14e-137	0.530674	0.922	0.618	6.47e-133	1	Nop58
Acat1	1.36e-137	0.52369	0.978	0.776	7.71e-133	1	Acat1
Exo1	3.32e-137	0.297611	0.417	0.131	1.89e-132	1	Exo1
Ssrp1	1.19e-136	0.501841	0.965	0.706	6.74e-132	1	Ssrp1
Ckap2l	1.24e-136	0.42462	0.743	0.326	7.01e-132	1	Ckap2l
Bola2	1.51e-136	0.493315	0.984	0.809	8.57e-132	1	Bola2
Cenpe	4.66e-136	0.498655	0.698	0.311	2.65e-131	1	Cenpe
Nucks1	1.26e-134	0.520308	0.986	0.794	7.16e-130	1	Nucks1
Hpf1	1.44e-134	0.53828	0.945	0.656	8.16e-130	1	Hpf1
Timm50	4.48e-134	0.526006	0.966	0.696	2.54e-129	1	Timm50
Plk1	5.43e-134	0.388843	0.612	0.242	3.08e-129	1	Plk1
Ttk	5.98e-134	0.314433	0.464	0.16	3.39e-129	1	Ttk
D430041D05Rik	7.95e-134	0.390958	0.575	0.23	4.51e-129	1	D430041D05Rik
Ezh2	1.12e-133	0.502366	0.956	0.647	6.38e-129	1	Ezh2
Ubr7	2.7e-133	0.420508	0.652	0.284	1.53e-128	1	Ubr7
Nuf2	3.41e-133	0.356926	0.568	0.221	1.93e-128	1	Nuf2
Tpm4	6.36e-133	0.504689	0.864	0.471	3.61e-128	1	Tpm4
Rad18	7.61e-133	0.345312	0.482	0.174	4.32e-128	1	Rad18
Banf1	1.4e-132	0.526762	0.968	0.724	7.95e-128	1	Banf1
Cdk4	4.2e-132	0.394197	1	0.976	2.39e-127	1	Cdk4
Rps9	1.65e-131	0.314177	1	0.996	9.37e-127	1	Rps9
Alcam	2.19e-131	0.303485	0.596	0.24	1.24e-126	1	Alcam
H3c1	3.34e-131	0.293685	0.431	0.142	1.9e-126	1	H3c1
Thoc3	4.06e-131	0.492708	0.842	0.469	2.31e-126	1	Thoc3
Mif	5.7e-131	0.468775	0.998	0.946	3.24e-126	1	Mif
Snrpd2	6.54e-131	0.421734	0.996	0.921	3.71e-126	1	Snrpd2
Larp7	8.9e-130	0.482538	0.832	0.449	5.05e-125	1	Larp7
Prps1	1.53e-129	0.371564	0.624	0.258	8.66e-125	1	Prps1
Pole	4.77e-129	0.263071	0.385	0.119	2.71e-124	1	Pole
Cenpn	6.58e-129	0.356929	0.551	0.217	3.73e-124	1	Cenpn
Rbbp7	1.25e-128	0.537002	0.934	0.651	7.08e-124	1	Rbbp7
Eef1b2	1.97e-128	0.408349	1	0.973	1.12e-123	1	Eef1b2
H1f2	3.03e-128	0.501966	0.873	0.502	1.72e-123	1	H1f2
4631405J19Rik	4.9e-128	0.353715	0.36	0.11	2.78e-123	1	4631405J19Rik
Mcm7	6.55e-128	0.514199	0.955	0.625	3.72e-123	1	Mcm7
Prim2	1.32e-127	0.431211	0.745	0.36	7.49e-123	1	Prim2
Shmt1	1.34e-127	0.323129	0.474	0.17	7.61e-123	1	Shmt1
Gsr	1.48e-127	0.482572	0.724	0.355	8.41e-123	1	Gsr
Rrm1	2.6e-127	0.491345	0.888	0.518	1.47e-122	1	Rrm1
Smarcc1	4.79e-127	0.521191	0.94	0.639	2.72e-122	1	Smarcc1
Ptbp1	6.61e-127	0.508163	0.813	0.464	3.75e-122	1	Ptbp1
Ube2t	8.04e-127	0.338725	0.542	0.211	4.56e-122	1	Ube2t
Uba2	1e-126	0.498628	0.935	0.659	5.69e-122	1	Uba2
Sgo2a	1.06e-126	0.365425	0.603	0.246	6.01e-122	1	Sgo2a
Kpna2	1.25e-126	0.355534	0.511	0.192	7.07e-122	1	Kpna2
Dscc1	1.31e-126	0.326265	0.465	0.165	7.46e-122	1	Dscc1
Mnd1	1.49e-126	0.315686	0.465	0.167	8.44e-122	1	Mnd1
Gapdh	1.78e-126	0.454111	0.999	0.964	1.01e-121	1	Gapdh
Cenpf	2.95e-126	0.412061	0.906	0.491	1.67e-121	1	Cenpf
Ipo5	3.93e-126	0.473734	0.777	0.399	2.23e-121	1	Ipo5
Eef1a1	4.28e-126	0.318047	1	0.997	2.43e-121	1	Eef1a1
Plekho2	6.85e-126	0.281982	0.393	0.126	3.88e-121	1	Plekho2
Hint1	1.01e-125	0.343304	1	0.989	5.72e-121	1	Hint1
Rpl37	1.17e-125	0.317535	1	0.998	6.64e-121	1	Rpl37
E2f8	1.21e-125	0.276313	0.349	0.105	6.87e-121	1	E2f8
Cd63	1.52e-125	0.439198	1	0.964	8.6e-121	1	Cd63
Rbfox3	1.73e-125	0.315506	0.493	0.179	9.83e-121	1	Rbfox3
Cacng2	2.04e-125	0.404484	0.449	0.159	1.16e-120	1	Cacng2
Racgap1	4.15e-125	0.45806	0.847	0.435	2.35e-120	1	Racgap1
Mxra7	7.4e-125	0.365857	0.416	0.141	4.2e-120	1	Mxra7
Cox7a2	2.11e-124	0.389796	0.999	0.963	1.2e-119	1	Cox7a2
Nmral1	2.69e-124	0.410249	0.736	0.35	1.53e-119	1	Nmral1
Mthfd2	2.33e-123	0.366016	0.537	0.215	1.32e-118	1	Mthfd2
Rpl35	2.37e-123	0.395313	1	0.962	1.35e-118	1	Rpl35
Pold2	7.65e-123	0.421899	0.716	0.342	4.34e-118	1	Pold2
Mns1	8.07e-123	0.261581	0.559	0.223	4.58e-118	1	Mns1
Dhx32	1.02e-122	0.359743	0.524	0.207	5.78e-118	1	Dhx32
Anp32e	1.82e-122	0.473275	0.992	0.808	1.04e-117	1	Anp32e
Ucma	1.92e-122	0.354802	0.383	0.124	1.09e-117	1	Ucma
Nxt1	2.11e-122	0.446292	0.819	0.435	1.2e-117	1	Nxt1
Nudc	5.57e-122	0.351274	0.983	0.802	3.16e-117	1	Nudc
Cmc2	1.17e-121	0.459346	0.824	0.446	6.63e-117	1	Cmc2
Crybg3	1.6e-121	0.290907	0.34	0.103	9.07e-117	1	Crybg3
Islr	3.14e-121	0.287423	0.458	0.164	1.78e-116	1	Islr
Ect2	3.36e-121	0.349634	0.529	0.207	1.91e-116	1	Ect2
Ccnb1	3.67e-121	0.36705	0.753	0.345	2.08e-116	1	Ccnb1
Diaph3	4.25e-121	0.318205	0.485	0.183	2.41e-116	1	Diaph3
Snrpa1	1.01e-120	0.482448	0.983	0.794	5.75e-116	1	Snrpa1
Peg3	1.56e-120	0.520458	0.79	0.431	8.85e-116	1	Peg3
Rpl36	1.98e-120	0.328687	1	0.995	1.13e-115	1	Rpl36
Cbfa2t3	3.45e-120	0.342501	0.567	0.227	1.96e-115	1	Cbfa2t3
Cdkn2c	8.87e-120	0.35348	0.63	0.271	5.03e-115	1	Cdkn2c
Kif20a	1.07e-119	0.310298	0.474	0.175	6.07e-115	1	Kif20a
Kif23	1.12e-119	0.345593	0.488	0.187	6.35e-115	1	Kif23
Pcbp4	2.45e-119	0.502702	0.966	0.735	1.39e-114	1	Pcbp4
Lsm8	1.06e-118	0.487458	0.956	0.687	6.03e-114	1	Lsm8
Uhrf1	1.24e-118	0.452238	0.672	0.314	7.03e-114	1	Uhrf1
Epha8	1.3e-118	0.334741	0.235	0.056	7.38e-114	1	Epha8
Rpl12	1.94e-118	0.418644	0.997	0.929	1.1e-113	1	Rpl12
Smchd1	2.16e-118	0.475426	0.9	0.57	1.22e-113	1	Smchd1
Dkc1	4.09e-118	0.467637	0.839	0.476	2.32e-113	1	Dkc1
Reln	4.16e-118	0.256589	0.525	0.199	2.36e-113	1	Reln
Syne2	6.48e-118	0.394607	0.726	0.35	3.68e-113	1	Syne2
Apba2	1.67e-117	0.454308	0.79	0.416	9.47e-113	1	Apba2
Eny2	3.25e-117	0.438303	0.992	0.83	1.84e-112	1	Eny2
Rpa3	3.43e-117	0.481315	0.931	0.629	1.94e-112	1	Rpa3
G3bp1	4.87e-117	0.444317	0.981	0.805	2.76e-112	1	G3bp1
Rpl37a	8.1e-117	0.309092	1	0.998	4.6e-112	1	Rpl37a
Tex30	8.58e-117	0.403925	0.753	0.375	4.87e-112	1	Tex30
Hnrnpa0	1.11e-115	0.383604	1	0.976	6.32e-111	1	Hnrnpa0
Rnaseh2c	2.53e-115	0.500649	0.96	0.708	1.43e-110	1	Rnaseh2c
Smc1a	3.56e-115	0.481553	0.97	0.737	2.02e-110	1	Smc1a
Fam111a	3.88e-115	0.292056	0.431	0.153	2.2e-110	1	Fam111a
Kif20b	4.26e-115	0.351262	0.529	0.213	2.42e-110	1	Kif20b
Gins4	1.63e-114	0.390757	0.704	0.337	9.25e-110	1	Gins4
Taf10	2.29e-114	0.442705	0.982	0.841	1.3e-109	1	Taf10
Mrpl42	9.28e-114	0.482774	0.916	0.626	5.27e-109	1	Mrpl42
Rfc2	3.48e-113	0.491041	0.908	0.596	1.97e-108	1	Rfc2
Psmc3ip	3.84e-113	0.437367	0.837	0.458	2.18e-108	1	Psmc3ip
Hnrnpu	6.4e-113	0.515652	0.992	0.892	3.63e-108	1	Hnrnpu
Ppil1	7.49e-113	0.44982	0.85	0.488	4.25e-108	1	Ppil1
Nhp2	1.02e-112	0.47065	0.971	0.774	5.76e-108	1	Nhp2
Pwwp3b	4.32e-112	0.274788	0.359	0.118	2.45e-107	1	Pwwp3b
Rbm3	5.43e-112	0.49773	0.888	0.559	3.08e-107	1	Rbm3
Rcor2	1.26e-111	0.345262	0.66	0.294	7.17e-107	1	Rcor2
Rbm8a	5.76e-111	0.447739	0.968	0.764	3.27e-106	1	Rbm8a
Ppat	7.07e-111	0.361177	0.609	0.272	4.01e-106	1	Ppat
Rps18	7.61e-111	0.350274	1	0.986	4.32e-106	1	Rps18
Nup85	1.14e-110	0.35023	0.599	0.264	6.48e-106	1	Nup85
Gm11837	1.74e-110	0.288631	0.43	0.158	9.89e-106	1	Gm11837
Atp5j	3.02e-110	0.338498	1	0.975	1.71e-105	1	Atp5j
Rpl10	1.19e-109	0.393284	0.995	0.918	6.77e-105	1	Rpl10
Ncapg2	1.25e-109	0.291426	0.423	0.155	7.07e-105	1	Ncapg2
Cycs	4.78e-109	0.460186	0.86	0.523	2.71e-104	1	Cycs
Tmem238	5.57e-109	0.336065	0.523	0.217	3.16e-104	1	Tmem238
Rpa1	1.5e-108	0.370148	0.602	0.274	8.51e-104	1	Rpa1
Rpl7a	5.79e-108	0.361028	0.999	0.98	3.29e-103	1	Rpl7a
Brca2	7.27e-108	0.326215	0.511	0.21	4.12e-103	1	Brca2
Ttc9b	1.42e-107	0.398802	0.685	0.331	8.08e-103	1	Ttc9b
Sf3a3	1.05e-106	0.446434	0.892	0.594	5.95e-102	1	Sf3a3
Qdpr	1.19e-106	0.374625	0.625	0.292	6.74e-102	1	Qdpr
Rassf3	1.26e-106	0.308016	0.5	0.202	7.14e-102	1	Rassf3
Gtf2a2	1.48e-106	0.422515	0.975	0.801	8.42e-102	1	Gtf2a2
Lsm5	1.89e-106	0.456805	0.956	0.69	1.07e-101	1	Lsm5
Impdh2	3.79e-106	0.473052	0.904	0.605	2.15e-101	1	Impdh2
Hnrnpa3	9.02e-106	0.550042	0.987	0.847	5.12e-101	1	Hnrnpa3
Ptges3	1.36e-105	0.419849	0.975	0.796	7.74e-101	1	Ptges3
Gm15772	1.66e-105	0.451461	0.989	0.897	9.41e-101	1	Gm15772
Psma7	2.24e-105	0.361828	1	0.954	1.27e-100	1	Psma7
Smarca5	2.95e-105	0.47026	0.962	0.762	1.68e-100	1	Smarca5
Uck2	3.41e-105	0.313417	0.575	0.247	1.93e-100	1	Uck2
Blm	7.69e-105	0.303435	0.482	0.194	4.36e-100	1	Blm
Lsm4	1.51e-104	0.424436	0.988	0.858	8.56e-100	1	Lsm4
Tcf19	2.29e-104	0.301951	0.41	0.15	1.3e-99	1	Tcf19
Suz12	4.81e-104	0.439394	0.8	0.455	2.73e-99	1	Suz12
Cxcl14	2.32e-103	0.301268	0.5	0.203	1.31e-98	1	Cxcl14
Dtymk	2.86e-103	0.458968	0.947	0.657	1.62e-98	1	Dtymk
Rpl23a	4.12e-103	0.423487	0.986	0.818	2.34e-98	1	Rpl23a
Pdgfa	9.41e-103	0.44261	0.451	0.186	5.34e-98	1	Pdgfa
Eif1ad	3e-102	0.414296	0.817	0.472	1.7e-97	1	Eif1ad
Mcm5	1.11e-101	0.370894	0.759	0.388	6.29e-97	1	Mcm5
Kntc1	1.21e-101	0.251276	0.347	0.118	6.87e-97	1	Kntc1
Hmgb3	1.44e-101	0.406603	0.997	0.837	8.15e-97	1	Hmgb3
Cep57	1.76e-101	0.378181	0.756	0.396	9.99e-97	1	Cep57
Baz1b	1.85e-101	0.428249	0.791	0.439	1.05e-96	1	Baz1b
Rpl5	2.94e-101	0.404226	0.989	0.867	1.67e-96	1	Rpl5
Vrk1	3.87e-101	0.337243	0.704	0.345	2.19e-96	1	Vrk1
Dhfr	6.52e-101	0.380702	0.697	0.357	3.7e-96	1	Dhfr
Brpf1	6.99e-101	0.322494	0.526	0.227	3.97e-96	1	Brpf1
Gli2	7.49e-101	0.285385	0.439	0.169	4.25e-96	1	Gli2
Taf5	7.61e-101	0.280128	0.446	0.175	4.32e-96	1	Taf5
Hspa14	1.59e-100	0.426399	0.871	0.554	9.02e-96	1	Hspa14
Nek2	3.45e-100	0.294036	0.438	0.17	1.96e-95	1	Nek2
Txnl1	6.74e-100	0.374733	0.992	0.892	3.82e-95	1	Txnl1
Rbbp8	7.81e-100	0.275755	0.474	0.19	4.43e-95	1	Rbbp8
Rps6ka6	9.41e-100	0.266241	0.421	0.16	5.34e-95	1	Rps6ka6
Fkbp4	1.74e-99	0.409996	0.989	0.867	9.86e-95	1	Fkbp4
Dock11	2.04e-99	0.298862	0.504	0.211	1.16e-94	1	Dock11
Phf5a	2.17e-99	0.413218	0.976	0.793	1.23e-94	1	Phf5a
Gli1	2.63e-99	0.264884	0.42	0.16	1.49e-94	1	Gli1
Ly6e	3.22e-99	0.291986	0.494	0.204	1.83e-94	1	Ly6e
Cbx1	3.27e-99	0.450288	0.963	0.733	1.86e-94	1	Cbx1
Blmh	4.96e-99	0.460779	0.88	0.582	2.81e-94	1	Blmh
Eif2s1	7.34e-99	0.432244	0.94	0.689	4.16e-94	1	Eif2s1
Rpl38	9.79e-99	0.305139	0.999	0.988	5.56e-94	1	Rpl38
Baz1a	1.08e-98	0.32224	0.589	0.266	6.14e-94	1	Baz1a
Prxl2b	2.08e-98	0.274602	0.556	0.237	1.18e-93	1	Prxl2b
Dpy30	3.13e-98	0.409874	0.954	0.698	1.78e-93	1	Dpy30
Limd2	1.07e-97	0.448103	0.877	0.56	6.07e-93	1	Limd2
Acot7	1.28e-97	0.30788	0.478	0.201	7.26e-93	1	Acot7
Uchl5	1.56e-97	0.404675	0.81	0.453	8.85e-93	1	Uchl5
Arpp19	2.17e-97	0.40938	0.979	0.794	1.23e-92	1	Arpp19
Ank3	4.63e-97	0.259376	0.518	0.216	2.63e-92	1	Ank3
Mrpl28	6.64e-97	0.401404	0.984	0.828	3.77e-92	1	Mrpl28
Pax6	2.23e-96	0.395801	0.907	0.56	1.27e-91	1	Pax6
Stmn1	4.39e-96	0.375843	0.892	0.536	2.49e-91	1	Stmn1
A430005L14Rik	5.14e-96	0.385647	0.742	0.4	2.92e-91	1	A430005L14Rik
Cenpq	5.92e-96	0.365723	0.819	0.447	3.36e-91	1	Cenpq
Pim1	5.98e-96	0.278381	0.558	0.245	3.4e-91	1	Pim1
Nop56	6.23e-96	0.372134	0.768	0.417	3.54e-91	1	Nop56
Rpa2	3.09e-95	0.401418	0.778	0.429	1.75e-90	1	Rpa2
Ncapd2	5.44e-95	0.305603	0.551	0.245	3.09e-90	1	Ncapd2
Pkdcc	5.76e-95	0.385126	0.415	0.167	3.27e-90	1	Pkdcc
Cdkn2d	2.14e-94	0.347864	0.733	0.38	1.21e-89	1	Cdkn2d
Dck	2.33e-94	0.287732	0.484	0.202	1.32e-89	1	Dck
Nup43	3.98e-94	0.315445	0.592	0.277	2.26e-89	1	Nup43
Magohb	4.76e-94	0.380115	0.755	0.411	2.7e-89	1	Magohb
Rpl17	1.29e-93	0.34295	0.999	0.96	7.34e-89	1	Rpl17
Nsd2	1.42e-93	0.413947	0.863	0.531	8.05e-89	1	Nsd2
Rps6	2.14e-93	0.421593	0.921	0.655	1.21e-88	1	Rps6
Hdgf	3.21e-93	0.37615	0.994	0.865	1.82e-88	1	Hdgf
Ankle1	5.3e-93	0.254616	0.35	0.125	3.01e-88	1	Ankle1
Asns	6.6e-93	0.251637	0.468	0.191	3.75e-88	1	Asns
Ddx27	8.71e-93	0.35717	0.711	0.372	4.94e-88	1	Ddx27
Taf12	8.75e-93	0.377441	0.776	0.435	4.96e-88	1	Taf12
Pimreg	2.84e-92	0.250873	0.672	0.311	1.61e-87	1	Pimreg
Bcar1	3.94e-92	0.274649	0.463	0.191	2.23e-87	1	Bcar1
Ift27	5.53e-92	0.428824	0.906	0.6	3.14e-87	1	Ift27
Mcm2	5.7e-92	0.335239	0.666	0.325	3.23e-87	1	Mcm2
Chaf1a	1.26e-91	0.269441	0.427	0.172	7.16e-87	1	Chaf1a
Bub1b	1.71e-91	0.32844	0.545	0.246	9.72e-87	1	Bub1b
Sf3b5	3.65e-91	0.366558	0.987	0.843	2.07e-86	1	Sf3b5
Srf	4.63e-91	0.26081	0.419	0.166	2.63e-86	1	Srf
Nfyb	5.81e-91	0.401894	0.78	0.444	3.3e-86	1	Nfyb
Mcm3	6.38e-91	0.38341	0.737	0.386	3.62e-86	1	Mcm3
Cnbp	6.95e-91	0.34901	0.999	0.938	3.94e-86	1	Cnbp
Prdx1	8.61e-91	0.354848	0.995	0.938	4.88e-86	1	Prdx1
Rcc1	2.73e-90	0.331398	0.63	0.309	1.55e-85	1	Rcc1
Rpl34	2.73e-90	0.322154	0.998	0.963	1.55e-85	1	Rpl34
Abt1	3.97e-90	0.334903	0.669	0.34	2.25e-85	1	Abt1
Slbp	1.1e-89	0.293759	0.393	0.152	6.24e-85	1	Slbp
Mrpl12	1.25e-89	0.39807	0.973	0.783	7.07e-85	1	Mrpl12
Man1c1	3.83e-89	0.310573	0.643	0.313	2.17e-84	1	Man1c1
Dnajc2	4.12e-89	0.399431	0.877	0.562	2.34e-84	1	Dnajc2
Camk2n2	6.41e-89	0.352816	0.725	0.385	3.64e-84	1	Camk2n2
Paics	9.01e-89	0.386979	0.975	0.8	5.11e-84	1	Paics
Pcnt	1.78e-88	0.262911	0.454	0.192	1.01e-83	1	Pcnt
Rnf187	4.1e-88	0.372738	0.99	0.873	2.33e-83	1	Rnf187
Gemin2	5.4e-88	0.253929	0.467	0.197	3.07e-83	1	Gemin2
Atpif1	5.65e-88	0.292187	0.998	0.978	3.21e-83	1	Atpif1
Eif1ax	7.95e-88	0.377561	0.989	0.849	4.51e-83	1	Eif1ax
Haus8	1.26e-87	0.269827	0.459	0.196	7.13e-83	1	Haus8
Exosc7	1.31e-87	0.385901	0.84	0.517	7.45e-83	1	Exosc7
Haus1	1.73e-87	0.377542	0.783	0.442	9.79e-83	1	Haus1
Cep295	1.99e-87	0.291495	0.558	0.257	1.13e-82	1	Cep295
Uba52	3.21e-87	0.39664	0.967	0.749	1.82e-82	1	Uba52
Rps10	3.69e-87	0.334656	0.999	0.953	2.09e-82	1	Rps10
Orc6	1.73e-86	0.38119	0.786	0.453	9.83e-82	1	Orc6
Khdrbs3	2.31e-86	0.367324	0.694	0.372	1.31e-81	1	Khdrbs3
Chchd1	4.4e-86	0.362895	0.989	0.875	2.5e-81	1	Chchd1
Ndufa4	4.69e-86	0.264101	1	0.989	2.66e-81	1	Ndufa4
Tcp1	5.22e-85	0.385442	0.976	0.8	2.96e-80	1	Tcp1
Cdc7	1.83e-84	0.256556	0.497	0.22	1.04e-79	1	Cdc7
Bccip	2.48e-84	0.38225	0.858	0.538	1.41e-79	1	Bccip
Gemin6	4.22e-84	0.275667	0.514	0.233	2.39e-79	1	Gemin6
Srsf2	1.08e-83	0.378455	0.979	0.793	6.12e-79	1	Srsf2
Sae1	1.23e-83	0.347819	0.66	0.344	7e-79	1	Sae1
Mrfap1	1.81e-83	0.340992	0.995	0.892	1.03e-78	1	Mrfap1
Carnmt1	1.9e-83	0.299923	0.447	0.193	1.08e-78	1	Carnmt1
Utp3	2.93e-83	0.385792	0.864	0.562	1.66e-78	1	Utp3
Itgb3bp	4.67e-83	0.289569	0.554	0.258	2.65e-78	1	Itgb3bp
Odc1	6.28e-83	0.353013	0.743	0.419	3.56e-78	1	Odc1
Shf	6.39e-83	0.285054	0.706	0.371	3.63e-78	1	Shf
Adk	7.32e-83	0.369509	0.804	0.474	4.15e-78	1	Adk
Trim59	8.41e-83	0.296576	0.621	0.304	4.77e-78	1	Trim59
Nup37	8.47e-83	0.285664	0.588	0.281	4.81e-78	1	Nup37
Topbp1	1.13e-82	0.33667	0.776	0.439	6.39e-78	1	Topbp1
Trp53	1.14e-82	0.359178	0.842	0.519	6.49e-78	1	Trp53
Tcerg1	3.08e-82	0.340517	0.8	0.462	1.75e-77	1	Tcerg1
Bcas2	4.02e-82	0.348903	0.981	0.86	2.28e-77	1	Bcas2
Tacc3	1.02e-81	0.284198	0.735	0.372	5.78e-77	1	Tacc3
Ier5	1.81e-81	0.331407	0.801	0.475	1.03e-76	1	Ier5
Idh2	3.89e-81	0.382304	0.966	0.75	2.21e-76	1	Idh2
Snu13	4.52e-81	0.385315	0.9	0.632	2.57e-76	1	Snu13
Ola1	5.44e-81	0.389921	0.925	0.664	3.08e-76	1	Ola1
Nol7	5.55e-81	0.357161	0.982	0.858	3.15e-76	1	Nol7
Npm3	6.96e-81	0.343491	0.639	0.338	3.95e-76	1	Npm3
Cplx2	7.06e-81	0.319485	0.625	0.315	4e-76	1	Cplx2
Srsf9	8.21e-81	0.345321	0.992	0.875	4.66e-76	1	Srsf9
Haus4	2.51e-80	0.27709	0.445	0.196	1.43e-75	1	Haus4
Scaf11	2.56e-80	0.387729	0.928	0.669	1.45e-75	1	Scaf11
Nolc1	2.91e-80	0.358268	0.731	0.411	1.65e-75	1	Nolc1
Ppp1r14b	3.13e-80	0.337272	1	0.963	1.78e-75	1	Ppp1r14b
Tfdp1	1.51e-79	0.336944	0.731	0.407	8.57e-75	1	Tfdp1
Prr5	2.71e-79	0.307607	0.439	0.195	1.54e-74	1	Prr5
Tcof1	2.99e-79	0.282729	0.543	0.258	1.7e-74	1	Tcof1
Naa50	3.41e-79	0.397617	0.909	0.645	1.93e-74	1	Naa50
Prdx6	3.62e-79	0.347495	0.968	0.735	2.06e-74	1	Prdx6
Polr1h	5.99e-79	0.362558	0.876	0.581	3.4e-74	1	Polr1h
Trir	1.32e-78	0.350262	0.986	0.856	7.48e-74	1	Trir
Fbl	1.54e-78	0.379877	0.865	0.57	8.73e-74	1	Fbl
Exosc5	2.65e-78	0.257697	0.538	0.253	1.5e-73	1	Exosc5
Purb	5.96e-78	0.381921	0.97	0.81	3.38e-73	1	Purb
Cdk2ap1	1.79e-77	0.335602	0.994	0.866	1.02e-72	1	Cdk2ap1
Actl6a	3.95e-77	0.366761	0.884	0.575	2.24e-72	1	Actl6a
Pfdn4	6.98e-77	0.328222	0.778	0.448	3.96e-72	1	Pfdn4
Eri1	1.38e-76	0.296006	0.677	0.357	7.84e-72	1	Eri1
Ccnd2	1.62e-76	0.30166	0.941	0.71	9.17e-72	1	Ccnd2
Evl	3.69e-76	0.316822	0.819	0.488	2.09e-71	1	Evl
Cltb	4.83e-76	0.525689	0.681	0.384	2.74e-71	1	Cltb
Ppp1ca	9.13e-76	0.359524	0.987	0.871	5.18e-71	1	Ppp1ca
Cdkn1b	1.29e-75	0.321504	0.719	0.396	7.29e-71	1	Cdkn1b
Nup50	1.52e-75	0.312244	0.636	0.333	8.62e-71	1	Nup50
Pfdn2	4.69e-75	0.34506	0.984	0.834	2.66e-70	1	Pfdn2
Sem1	5.07e-75	0.255552	1	0.975	2.88e-70	1	Sem1
Cdk6	6.77e-75	0.253127	0.543	0.258	3.84e-70	1	Cdk6
Eif3k	7.97e-75	0.326327	0.989	0.897	4.52e-70	1	Eif3k
Oxct1	1e-74	0.370969	0.963	0.733	5.69e-70	1	Oxct1
Cdca7	2.32e-74	0.272283	0.644	0.325	1.32e-69	1	Cdca7
Cavin2	2.57e-74	0.275015	0.308	0.117	1.46e-69	1	Cavin2
Epb41	3.47e-74	0.259672	0.625	0.317	1.97e-69	1	Epb41
Cenpx	5.27e-74	0.368897	0.936	0.691	2.99e-69	1	Cenpx
Hnrnpf	1.14e-73	0.349594	0.989	0.854	6.48e-69	1	Hnrnpf
Pabpc1	1.63e-73	0.367251	0.95	0.763	9.23e-69	1	Pabpc1
Pitpnb	3.11e-73	0.34922	0.83	0.532	1.77e-68	1	Pitpnb
Xrcc1	3.69e-73	0.290234	0.662	0.354	2.1e-68	1	Xrcc1
Seh1l	4.33e-73	0.310815	0.69	0.382	2.46e-68	1	Seh1l
Tomm7	1.03e-72	0.274287	0.997	0.949	5.86e-68	1	Tomm7
Nme1	1.13e-72	0.351391	0.886	0.602	6.39e-68	1	Nme1
Mrps15	2.17e-72	0.345576	0.861	0.565	1.23e-67	1	Mrps15
Spop	2.89e-72	0.364235	0.807	0.508	1.64e-67	1	Spop
Emg1	8.3e-72	0.343531	0.946	0.733	4.71e-67	1	Emg1
Eif4a3	1.65e-71	0.346955	0.966	0.793	9.37e-67	1	Eif4a3
Hat1	1.66e-71	0.323023	0.88	0.568	9.42e-67	1	Hat1
Rpl27	2.04e-71	0.300349	0.995	0.939	1.16e-66	1	Rpl27
Chd7	2.55e-71	0.273998	0.826	0.479	1.45e-66	1	Chd7
Metap2	3.23e-71	0.347296	0.969	0.77	1.83e-66	1	Metap2
Rpl35a	5.01e-71	0.354108	0.848	0.554	2.84e-66	1	Rpl35a
Nans	5.13e-71	0.28001	0.646	0.347	2.91e-66	1	Nans
Nubp1	6.34e-71	0.304637	0.669	0.366	3.6e-66	1	Nubp1
Snrpd3	1.97e-70	0.31239	0.995	0.889	1.12e-65	1	Snrpd3
Mrpl57	2.08e-70	0.364843	0.927	0.686	1.18e-65	1	Mrpl57
Parp2	3.02e-70	0.308644	0.688	0.386	1.71e-65	1	Parp2
Stag1	4.21e-70	0.322164	0.743	0.434	2.39e-65	1	Stag1
Kmt5a	4.23e-70	0.330456	0.823	0.503	2.4e-65	1	Kmt5a
Ppm1g	4.61e-70	0.319564	0.828	0.513	2.61e-65	1	Ppm1g
Nudcd2	5.24e-70	0.357548	0.935	0.706	2.97e-65	1	Nudcd2
Cntln	5.25e-70	0.317999	0.668	0.367	2.98e-65	1	Cntln
Rnf126	5.92e-70	0.348276	0.848	0.549	3.36e-65	1	Rnf126
Nono	6.49e-70	0.348529	0.849	0.539	3.68e-65	1	Nono
Ifrd1	8.68e-70	0.341841	0.892	0.609	4.93e-65	1	Ifrd1
Mrpl20	8.92e-70	0.316768	0.979	0.833	5.06e-65	1	Mrpl20
Apex1	1.6e-69	0.346103	0.97	0.792	9.08e-65	1	Apex1
Naa20	2.66e-69	0.304885	0.74	0.422	1.51e-64	1	Naa20
C1qbp	5.54e-69	0.327696	0.982	0.851	3.15e-64	1	C1qbp
Gars	5.72e-69	0.339709	0.82	0.533	3.25e-64	1	Gars
Rfc3	8.7e-69	0.30753	0.817	0.496	4.94e-64	1	Rfc3
Ube2e3	1.31e-68	0.301259	0.989	0.86	7.42e-64	1	Ube2e3
Ncbp1	1.58e-68	0.312361	0.709	0.408	8.96e-64	1	Ncbp1
Ddx39a	1.61e-68	0.356318	0.918	0.666	9.12e-64	1	Ddx39a
Sowaha	2.6e-68	0.256506	0.232	0.078	1.48e-63	1	Sowaha
Ppp1r7	4.37e-68	0.326414	0.805	0.494	2.48e-63	1	Ppp1r7
Cmss1	6.46e-68	0.297906	0.702	0.39	3.66e-63	1	Cmss1
Hells	1.79e-67	0.307959	0.666	0.365	1.01e-62	1	Hells
Hnrnpm	4.16e-67	0.337419	0.966	0.796	2.36e-62	1	Hnrnpm
Psma1	5.91e-67	0.347417	0.948	0.766	3.36e-62	1	Psma1
Gm10039	1.59e-66	0.31031	0.531	0.276	9.02e-62	1	Gm10039
Med28	4.11e-66	0.335323	0.912	0.679	2.33e-61	1	Med28
Gtf3a	4.38e-66	0.32383	0.781	0.481	2.49e-61	1	Gtf3a
Eif2b3	4.54e-66	0.269021	0.676	0.371	2.58e-61	1	Eif2b3
Eef1d	8.55e-66	0.308031	0.994	0.924	4.85e-61	1	Eef1d
Mrpl13	8.87e-66	0.337977	0.9	0.625	5.03e-61	1	Mrpl13
Rad21	1.22e-65	0.323574	0.823	0.513	6.94e-61	1	Rad21
Cse1l	4.17e-65	0.253814	0.541	0.276	2.37e-60	1	Cse1l
Htatsf1	5.1e-65	0.334149	0.757	0.461	2.89e-60	1	Htatsf1
Lsm7	6.42e-65	0.306315	0.852	0.549	3.64e-60	1	Lsm7
Pold3	1.25e-64	0.2645	0.644	0.35	7.11e-60	1	Pold3
Mrpl15	1.26e-64	0.273414	0.673	0.373	7.15e-60	1	Mrpl15
Ccdc167	2.06e-64	0.258863	0.537	0.271	1.17e-59	1	Ccdc167
Gps2	5.72e-64	0.31188	0.766	0.462	3.25e-59	1	Gps2
Dnajc8	8.87e-64	0.327585	0.944	0.722	5.04e-59	1	Dnajc8
Zc3h18	1.57e-63	0.265533	0.624	0.337	8.93e-59	1	Zc3h18
Prdx4	2.35e-63	0.308363	0.989	0.845	1.33e-58	1	Prdx4
Eln	1.15e-62	0.30685	0.314	0.131	6.55e-58	1	Eln
Erh	1.98e-62	0.327917	0.946	0.72	1.12e-57	1	Erh
Psip1	2.09e-62	0.285193	0.998	0.91	1.19e-57	1	Psip1
Rrs1	2.12e-62	0.256423	0.659	0.362	1.2e-57	1	Rrs1
Nkd1	3.35e-62	0.315902	0.802	0.498	1.9e-57	1	Nkd1
Nudt21	3.73e-62	0.323489	0.875	0.612	2.12e-57	1	Nudt21
Faf1	5.24e-62	0.257321	0.596	0.321	2.97e-57	1	Faf1
H2az2	5.73e-62	0.255813	1	0.983	3.25e-57	1	H2az2
Sap30	9.04e-62	0.307225	0.833	0.528	5.13e-57	1	Sap30
Hspd1	1.03e-61	0.325042	0.978	0.879	5.85e-57	1	Hspd1
Dazap1	2.73e-61	0.303856	0.933	0.68	1.55e-56	1	Dazap1
Stub1	6.95e-61	0.295156	0.99	0.865	3.94e-56	1	Stub1
Cxxc5	1.32e-60	0.283379	0.849	0.554	7.48e-56	1	Cxxc5
Pbrm1	2.04e-60	0.311807	0.899	0.635	1.16e-55	1	Pbrm1
Sec61b	2.49e-60	0.270259	0.992	0.915	1.41e-55	1	Sec61b
Parp1	3.39e-60	0.287924	0.756	0.458	1.93e-55	1	Parp1
Pcbp1	1.71e-59	0.29712	0.99	0.881	9.7e-55	1	Pcbp1
Atp5g1	1.73e-59	0.314929	0.993	0.921	9.81e-55	1	Atp5g1
Ak2	1.88e-59	0.328257	0.887	0.604	1.07e-54	1	Ak2
Polr2h	3.73e-59	0.312257	0.828	0.543	2.12e-54	1	Polr2h
Cibar1	4.13e-59	0.329351	0.912	0.682	2.34e-54	1	Cibar1
Thoc7	6.01e-59	0.288454	0.986	0.85	3.41e-54	1	Thoc7
Eif3g	7.11e-59	0.337386	0.895	0.678	4.04e-54	1	Eif3g
Brd3	8.09e-59	0.289457	0.802	0.505	4.59e-54	1	Brd3
Cisd1	8.3e-59	0.309823	0.984	0.859	4.71e-54	1	Cisd1
Myg1	8.74e-59	0.252007	0.641	0.357	4.96e-54	1	Myg1
Eif4e	1.05e-58	0.273631	0.743	0.441	5.96e-54	1	Eif4e
Meaf6	1.31e-58	0.291051	0.851	0.554	7.42e-54	1	Meaf6
Dhx9	1.68e-58	0.319093	0.943	0.721	9.52e-54	1	Dhx9
Ssna1	2.9e-58	0.315474	0.944	0.731	1.64e-53	1	Ssna1
Trim28	5.46e-58	0.324051	0.945	0.699	3.1e-53	1	Trim28
Exosc3	5.87e-58	0.27867	0.725	0.437	3.33e-53	1	Exosc3
Hdac2	7.16e-58	0.298546	0.9	0.633	4.07e-53	1	Hdac2
Nae1	2.52e-57	0.302567	0.874	0.593	1.43e-52	1	Nae1
Nelfe	2.97e-57	0.278325	0.786	0.48	1.69e-52	1	Nelfe
Gspt1	3.61e-57	0.314435	0.93	0.704	2.05e-52	1	Gspt1
Lrrc59	5.11e-57	0.30102	0.807	0.521	2.9e-52	1	Lrrc59
Ctcf	5.17e-57	0.260141	0.677	0.389	2.93e-52	1	Ctcf
Maz	5.99e-57	0.312885	0.958	0.744	3.4e-52	1	Maz
Fmr1	1.28e-56	0.277521	0.761	0.467	7.27e-52	1	Fmr1
Ubtf	1.29e-56	0.315776	0.898	0.645	7.3e-52	1	Ubtf
Dnajc19	4.43e-56	0.303739	0.957	0.781	2.52e-51	1	Dnajc19
Ssb	4.49e-56	0.251664	0.995	0.93	2.55e-51	1	Ssb
Srrm1	4.96e-56	0.304166	0.966	0.818	2.82e-51	1	Srrm1
Nfic	1.11e-55	0.28709	0.678	0.399	6.31e-51	1	Nfic
Csnk1g2	1.52e-55	0.260455	0.708	0.41	8.62e-51	1	Csnk1g2
D030056L22Rik	6.39e-55	0.310886	0.878	0.594	3.63e-50	1	D030056L22Rik
Gkap1	7.94e-55	0.305041	0.851	0.586	4.5e-50	1	Gkap1
Bzw2	2.33e-54	0.2815	0.955	0.741	1.32e-49	1	Bzw2
Phb2	3.87e-54	0.280854	0.982	0.858	2.2e-49	1	Phb2
Ccm2	5.39e-54	0.281027	0.618	0.361	3.06e-49	1	Ccm2
Mrpl2	8.55e-54	0.298378	0.832	0.565	4.85e-49	1	Mrpl2
Cct6a	1.15e-53	0.265923	0.986	0.897	6.54e-49	1	Cct6a
Thrap3	2.61e-53	0.294994	0.851	0.577	1.48e-48	1	Thrap3
Fxn	3.53e-53	0.251471	0.682	0.398	2e-48	1	Fxn
Higd1a	4.29e-53	0.306034	0.931	0.741	2.44e-48	1	Higd1a
Srsf4	9.23e-53	0.268462	0.779	0.492	5.24e-48	1	Srsf4
Med30	1.2e-52	0.294487	0.921	0.652	6.79e-48	1	Med30
Mrps26	3.01e-52	0.271944	0.813	0.524	1.71e-47	1	Mrps26
Hnrnpc	3.51e-52	0.29745	0.953	0.788	1.99e-47	1	Hnrnpc
Arl6ip4	5.46e-52	0.283723	0.812	0.542	3.1e-47	1	Arl6ip4
Cox17	5.54e-52	0.265853	0.741	0.458	3.14e-47	1	Cox17
Ints11	1.72e-51	0.266235	0.721	0.446	9.76e-47	1	Ints11
Ptch1	6.04e-51	0.341659	0.735	0.509	3.42e-46	1	Ptch1
Hnrnpul2	6.42e-51	0.260223	0.6	0.342	3.65e-46	1	Hnrnpul2
Napa	1.09e-50	0.278373	0.849	0.569	6.18e-46	1	Napa
Pole3	1.76e-50	0.27768	0.844	0.569	1e-45	1	Pole3
Gm8730	7.81e-50	0.291448	0.8	0.527	4.43e-45	1	Gm8730
Ddx46	1.43e-49	0.281927	0.853	0.589	8.11e-45	1	Ddx46
Gjc1	5.85e-49	0.25795	0.692	0.421	3.32e-44	1	Gjc1
Polr2f	8.09e-49	0.254986	0.979	0.847	4.59e-44	1	Polr2f
Psmc6	8.56e-49	0.265331	0.967	0.809	4.86e-44	1	Psmc6
Pcbp2	2.28e-48	0.271523	0.985	0.848	1.29e-43	1	Pcbp2
Psmc4	4.46e-48	0.26643	0.973	0.831	2.53e-43	1	Psmc4
Psmc5	1.63e-47	0.261371	0.983	0.874	9.27e-43	1	Psmc5
Srpk1	2.22e-47	0.250985	0.739	0.462	1.26e-42	1	Srpk1
Eif3b	3.32e-47	0.255946	0.796	0.521	1.88e-42	1	Eif3b
Cdv3	3.51e-47	0.289142	0.919	0.708	1.99e-42	1	Cdv3
Brix1	4.69e-47	0.264146	0.82	0.562	2.66e-42	1	Brix1
Tpr	5.92e-47	0.266739	0.973	0.807	3.36e-42	1	Tpr
Gpx4	9.22e-47	0.269575	0.959	0.77	5.23e-42	1	Gpx4
Srrt	1.58e-46	0.263034	0.799	0.53	8.95e-42	1	Srrt
Mrpl54	2.1e-46	0.276691	0.874	0.642	1.19e-41	1	Mrpl54
Abcf1	2.53e-46	0.265767	0.855	0.592	1.44e-41	1	Abcf1
Cnot6	4.83e-46	0.251437	0.754	0.482	2.74e-41	1	Cnot6
AA465934	6.65e-46	0.306577	0.883	0.635	3.77e-41	1	AA465934
Mrps18c	7.26e-46	0.275162	0.845	0.575	4.12e-41	1	Mrps18c
Stip1	3.3e-45	0.256098	0.903	0.673	1.87e-40	1	Stip1
Rps18-ps6	4.14e-45	0.268226	0.973	0.8	2.35e-40	1	Rps18-ps6
Eif5b	6.65e-45	0.256789	0.92	0.718	3.78e-40	1	Eif5b
Stoml2	1.87e-44	0.257815	0.934	0.729	1.06e-39	1	Stoml2
Uchl3	2.2e-44	0.253921	0.933	0.734	1.25e-39	1	Uchl3
Hnrnpr	3.2e-44	0.259868	0.972	0.816	1.81e-39	1	Hnrnpr
Ncor1	3.24e-44	0.267723	0.912	0.685	1.84e-39	1	Ncor1
Pfdn6	9.58e-44	0.254648	0.877	0.609	5.44e-39	1	Pfdn6
Ccdc59	1.21e-43	0.261312	0.839	0.594	6.88e-39	1	Ccdc59
Psmg4	6.27e-43	0.250404	0.942	0.745	3.56e-38	1	Psmg4
Anapc5	7.79e-43	0.262647	0.942	0.721	4.42e-38	1	Anapc5
Nsmce1	1.03e-42	0.255232	0.899	0.668	5.83e-38	1	Nsmce1
Aurkaip1	1.75e-42	0.258119	0.831	0.563	9.93e-38	1	Aurkaip1
Rbis	5.56e-42	0.260253	0.854	0.612	3.15e-37	1	Rbis
Etf1	7.88e-42	0.259019	0.8	0.543	4.47e-37	1	Etf1
Gm47283	1.11e-41	0.273356	0.974	0.843	6.28e-37	1	Gm47283
Amer2	1.4e-41	0.293327	0.726	0.476	7.93e-37	1	Amer2
Prpf40a	1.59e-41	0.256661	0.924	0.72	9e-37	1	Prpf40a
Kras	7.66e-41	0.25251	0.915	0.699	4.35e-36	1	Kras
Hnrnpl	1.75e-40	0.260567	0.922	0.727	9.94e-36	1	Hnrnpl
Rpl14-ps1	3.25e-34	0.266858	0.641	0.447	1.85e-29	1	Rpl14-ps1
Rpsa-ps10	6.76e-34	0.34853	0.82	0.748	3.83e-29	1	Rpsa-ps10
Rps24-ps3	1.7e-17	0.354187	0.663	0.601	9.67e-13	1	Rps24-ps3
Ccn1	0	1.84204	0.905	0.417	0	2	Ccn1
Jun	0	1.793	1	0.917	0	2	Jun
Hopx	0	1.66381	0.97	0.439	0	2	Hopx
Junb	0	1.63555	0.992	0.792	0	2	Junb
Slc1a3	0	1.62867	0.999	0.699	0	2	Slc1a3
Atp1b1	0	1.54799	0.903	0.384	0	2	Atp1b1
Ednrb	0	1.51485	0.982	0.503	0	2	Ednrb
Fos	0	1.50992	1	0.964	0	2	Fos
Sparc	0	1.49136	0.992	0.553	0	2	Sparc
Pla2g7	0	1.47488	0.98	0.437	0	2	Pla2g7
Acot1	0	1.47355	0.998	0.741	0	2	Acot1
Sox9	0	1.43052	0.931	0.61	0	2	Sox9
Id3	0	1.40612	0.875	0.38	0	2	Id3
Sparcl1	0	1.34139	0.997	0.721	0	2	Sparcl1
Dbi	0	1.32218	1	0.969	0	2	Dbi
Ndrg2	0	1.31732	0.939	0.54	0	2	Ndrg2
Plpp3	0	1.21812	0.979	0.547	0	2	Plpp3
Cd81	0	1.12998	1	0.954	0	2	Cd81
Zfp36l1	1.13e-307	1.28021	0.968	0.678	6.43e-303	2	Zfp36l1
Aqp4	1.52e-303	1.53532	0.793	0.307	8.65e-299	2	Aqp4
Aldh1l1	5.54e-303	1.17721	0.906	0.396	3.15e-298	2	Aldh1l1
Dusp1	2.02e-302	1.46377	0.941	0.649	1.14e-297	2	Dusp1
Itm2b	1.63e-297	0.948029	1	0.995	9.23e-293	2	Itm2b
Mfge8	8.05e-297	1.28849	0.91	0.466	4.57e-292	2	Mfge8
Klf6	1.19e-296	1.47606	0.913	0.627	6.73e-292	2	Klf6
Gucy1a1	2.34e-292	1.2523	0.803	0.328	1.33e-287	2	Gucy1a1
Gdf10	7.97e-290	1.40346	0.877	0.413	4.52e-285	2	Gdf10
Cd9	1.33e-288	1.01851	0.998	0.91	7.56e-284	2	Cd9
Aldoc	2.31e-287	1.3109	0.732	0.262	1.31e-282	2	Aldoc
Ttyh1	8.97e-285	1.15583	0.874	0.399	5.09e-280	2	Ttyh1
Hes5	8.09e-284	1.54259	0.966	0.704	4.59e-279	2	Hes5
Btg2	4.11e-283	1.40916	0.973	0.816	2.34e-278	2	Btg2
Fabp7	1.23e-281	1.26626	1	0.951	7.01e-277	2	Fabp7
Ramp1	1.09e-274	1.15781	0.873	0.381	6.18e-270	2	Ramp1
Tst	6.89e-274	1.1794	0.935	0.557	3.91e-269	2	Tst
Id4	2.52e-271	1.19056	0.826	0.369	1.43e-266	2	Id4
Ier2	4.33e-269	1.29723	0.996	0.925	2.46e-264	2	Ier2
Ptprz1	1.72e-266	0.996552	0.972	0.502	9.78e-262	2	Ptprz1
Qk	3.95e-263	0.95301	0.992	0.877	2.24e-258	2	Qk
Cyp26b1	4.09e-255	1.148	0.84	0.391	2.32e-250	2	Cyp26b1
Nkain4	4.71e-255	1.11542	0.92	0.564	2.67e-250	2	Nkain4
Vim	2.06e-253	1.01507	1	0.985	1.17e-248	2	Vim
Pdlim3	6.66e-250	1.10262	0.828	0.396	3.78e-245	2	Pdlim3
Msx2	1.76e-249	1.08688	0.67	0.241	9.96e-245	2	Msx2
Jund	1.59e-247	1.00078	0.997	0.983	9e-243	2	Jund
Ptn	1.29e-246	0.864077	1	0.951	7.32e-242	2	Ptn
Hes1	2.79e-245	1.21702	0.871	0.508	1.58e-240	2	Hes1
Klf4	2.58e-244	1.44684	0.762	0.396	1.47e-239	2	Klf4
Plk2	6.54e-236	1.14071	0.643	0.248	3.71e-231	2	Plk2
Atp1a2	1.44e-231	0.902304	0.863	0.405	8.2e-227	2	Atp1a2
Gm26532	5.34e-230	1.08819	0.474	0.129	3.03e-225	2	Gm26532
Mt3	8.94e-228	0.853737	0.921	0.472	5.07e-223	2	Mt3
Cmtm5	2.61e-226	1.02787	0.672	0.26	1.48e-221	2	Cmtm5
Egr1	3.27e-216	0.932651	0.991	0.87	1.86e-211	2	Egr1
Timp4	4.86e-212	1.07454	0.854	0.409	2.76e-207	2	Timp4
Grm3	6.28e-212	0.887439	0.652	0.244	3.56e-207	2	Grm3
Fosb	7.56e-212	1.14987	0.792	0.46	4.29e-207	2	Fosb
AW047730	1.06e-209	1.00082	0.819	0.431	6.01e-205	2	AW047730
Adamts1	1.58e-208	1.19356	0.648	0.289	8.95e-204	2	Adamts1
Tnc	1.88e-208	0.957469	0.814	0.388	1.07e-203	2	Tnc
Gm3764	5.49e-206	0.875833	0.976	0.759	3.12e-201	2	Gm3764
Mmd2	1.8e-205	0.925858	0.637	0.244	1.02e-200	2	Mmd2
Mt1	7.18e-204	1.11504	0.868	0.53	4.07e-199	2	Mt1
Nid1	4.77e-203	0.962114	0.718	0.307	2.7e-198	2	Nid1
Rfx4	1.18e-197	0.914249	0.783	0.405	6.7e-193	2	Rfx4
Apoe	2.48e-194	0.940767	0.881	0.537	1.41e-189	2	Apoe
Cspg5	1.23e-193	0.80023	0.881	0.475	6.98e-189	2	Cspg5
Malat1	2.24e-193	1.02066	0.999	0.997	1.27e-188	2	Malat1
Gpr37l1	8.48e-192	1.18697	0.649	0.266	4.81e-187	2	Gpr37l1
Zfp36	3.55e-187	0.822756	0.544	0.193	2.01e-182	2	Zfp36
Luzp2	1.26e-185	0.999453	0.89	0.558	7.18e-181	2	Luzp2
Ckb	1.91e-185	0.843345	1	0.991	1.09e-180	2	Ckb
Btbd17	7.11e-184	1.02376	0.845	0.548	4.03e-179	2	Btbd17
Gpm6b	2.19e-182	0.862369	0.915	0.719	1.24e-177	2	Gpm6b
Lamp1	6.26e-182	0.701589	0.975	0.903	3.55e-177	2	Lamp1
Fjx1	7.35e-179	0.95664	0.867	0.546	4.17e-174	2	Fjx1
Dclk1	1.56e-178	0.922561	0.764	0.429	8.83e-174	2	Dclk1
Gm9347	3.45e-176	0.852433	0.921	0.7	1.96e-171	2	Gm9347
Ddah1	1.06e-175	0.889422	0.889	0.581	6.01e-171	2	Ddah1
Ndfip1	5.39e-175	0.676893	0.983	0.942	3.06e-170	2	Ndfip1
Socs3	3.46e-173	1.1702	0.79	0.503	1.96e-168	2	Socs3
Rlbp1	1.68e-172	0.874153	0.582	0.23	9.55e-168	2	Rlbp1
Col23a1	2.15e-171	0.821121	0.717	0.336	1.22e-166	2	Col23a1
Scd2	2.36e-169	0.758797	0.937	0.736	1.34e-164	2	Scd2
Glud1	2.33e-167	0.839717	0.867	0.628	1.32e-162	2	Glud1
Rxrg	3.4e-165	0.773167	0.532	0.197	1.93e-160	2	Rxrg
Mfap2	2.77e-162	0.808583	0.719	0.363	1.57e-157	2	Mfap2
Gstm1	5.69e-162	0.880913	0.764	0.429	3.23e-157	2	Gstm1
Gria1	1.53e-160	0.877264	0.511	0.189	8.68e-156	2	Gria1
Vcan	4.29e-158	0.884883	0.735	0.419	2.44e-153	2	Vcan
Gnai2	5.72e-158	0.678962	0.976	0.858	3.25e-153	2	Gnai2
Cdh4	2.55e-154	0.795695	0.596	0.264	1.45e-149	2	Cdh4
Paqr8	5.82e-154	0.784816	0.616	0.282	3.3e-149	2	Paqr8
Ctsl	4.85e-153	0.627734	0.935	0.801	2.75e-148	2	Ctsl
Gsta4	5.02e-153	0.769087	0.818	0.496	2.85e-148	2	Gsta4
Emid1	5.99e-153	0.837798	0.522	0.204	3.4e-148	2	Emid1
Spry2	2.04e-152	0.832281	0.707	0.381	1.16e-147	2	Spry2
Syt11	1.7e-148	0.786055	0.922	0.755	9.65e-144	2	Syt11
Tspan7	3.03e-148	0.731339	0.748	0.411	1.72e-143	2	Tspan7
Lxn	2.82e-147	0.728032	0.921	0.66	1.6e-142	2	Lxn
S1pr1	5.27e-147	0.736711	0.5	0.193	2.99e-142	2	S1pr1
Atf3	1.88e-146	1.21361	0.521	0.219	1.07e-141	2	Atf3
Dhrs3	5.08e-146	0.759389	0.525	0.211	2.89e-141	2	Dhrs3
Slc9a3r1	3.11e-143	0.79132	0.752	0.436	1.76e-138	2	Slc9a3r1
Emp2	1.49e-138	0.806055	0.411	0.139	8.47e-134	2	Emp2
ENSMUSG00000120008	2.17e-138	0.756588	0.643	0.315	1.23e-133	2	ENSMUSG00000120008
Pea15a	4.37e-138	0.762259	0.837	0.575	2.48e-133	2	Pea15a
Slc4a4	1.85e-133	0.710254	0.631	0.303	1.05e-128	2	Slc4a4
Phgdh	4.52e-133	0.753905	0.801	0.557	2.56e-128	2	Phgdh
Spock3	5.08e-133	0.807205	0.511	0.212	2.88e-128	2	Spock3
Bhlhe40	1.31e-132	0.593675	0.336	0.099	7.43e-128	2	Bhlhe40
Id1	5.75e-132	0.705739	0.939	0.755	3.26e-127	2	Id1
Btg1	1.33e-129	0.901306	0.844	0.679	7.54e-125	2	Btg1
Plat	1.87e-129	0.653119	0.648	0.317	1.06e-124	2	Plat
Grid2	4.31e-129	0.684558	0.499	0.208	2.45e-124	2	Grid2
Tlcd1	7.19e-129	0.780098	0.592	0.28	4.08e-124	2	Tlcd1
Limch1	2.63e-128	0.756592	0.661	0.368	1.49e-123	2	Limch1
Gng12	1.4e-127	0.720114	0.823	0.584	7.92e-123	2	Gng12
Pltp	3.04e-127	0.675465	0.738	0.418	1.73e-122	2	Pltp
Klf2	1.56e-126	1.40781	0.615	0.354	8.85e-122	2	Klf2
Fbxo2	1.29e-125	0.757681	0.519	0.223	7.34e-121	2	Fbxo2
Phlda1	4.71e-125	0.820399	0.597	0.294	2.67e-120	2	Phlda1
Glul	1.42e-123	0.816568	0.799	0.596	8.07e-119	2	Glul
Gabrb1	3.72e-121	0.63065	0.375	0.127	2.11e-116	2	Gabrb1
Hepacam	6.91e-120	0.646913	0.559	0.261	3.92e-115	2	Hepacam
Sdc3	1.04e-119	0.631247	0.722	0.428	5.89e-115	2	Sdc3
Lcat	1.09e-119	0.633916	0.376	0.129	6.18e-115	2	Lcat
Ackr3	6.11e-119	0.590342	0.381	0.134	3.47e-114	2	Ackr3
Sema6d	8.54e-119	0.681202	0.57	0.283	4.84e-114	2	Sema6d
Lsamp	1.36e-118	0.699977	0.651	0.36	7.74e-114	2	Lsamp
Ldhb	2.17e-117	0.633194	0.951	0.913	1.23e-112	2	Ldhb
Rnf182	9.66e-117	0.640588	0.462	0.195	5.48e-112	2	Rnf182
Acadl	1.95e-116	0.642554	0.891	0.724	1.11e-111	2	Acadl
Lgalsl	8.84e-114	0.737183	0.667	0.419	5.02e-109	2	Lgalsl
Pcx	9.69e-114	0.666724	0.575	0.292	5.5e-109	2	Pcx
Enho	1.08e-113	0.722693	0.794	0.576	6.14e-109	2	Enho
Arl8a	1.23e-113	0.696928	0.782	0.555	6.99e-109	2	Arl8a
Ppp1r15a	6.55e-113	0.867219	0.674	0.449	3.72e-108	2	Ppp1r15a
Fgfr1	9.02e-112	0.682495	0.604	0.326	5.12e-107	2	Fgfr1
Calcrl	1.35e-111	0.582797	0.468	0.197	7.67e-107	2	Calcrl
Itm2c	1.73e-111	0.639289	0.823	0.583	9.8e-107	2	Itm2c
Gria4	9.47e-110	0.700168	0.655	0.386	5.37e-105	2	Gria4
Laptm4a	2.08e-108	0.470408	0.989	0.973	1.18e-103	2	Laptm4a
Cntfr	2.22e-108	0.661558	0.474	0.212	1.26e-103	2	Cntfr
Irx1	6.81e-108	0.801122	0.688	0.445	3.86e-103	2	Irx1
Npas3	9.21e-108	0.671138	0.602	0.321	5.23e-103	2	Npas3
Selenok	3.71e-107	0.449675	0.985	0.978	2.1e-102	2	Selenok
Adcyap1r1	4.8e-107	0.655314	0.516	0.248	2.73e-102	2	Adcyap1r1
Id2	9.82e-107	0.840228	0.822	0.643	5.57e-102	2	Id2
1810037I17Rik	1e-106	0.546248	0.955	0.875	5.69e-102	2	1810037I17Rik
Igfbp7	1.89e-106	1.05815	0.46	0.202	1.07e-101	2	Igfbp7
Cst3	3.36e-106	0.524383	0.986	0.965	1.91e-101	2	Cst3
Aldh2	6.85e-105	0.632092	0.765	0.542	3.89e-100	2	Aldh2
Psap	1.48e-104	0.614217	0.784	0.55	8.39e-100	2	Psap
Gm29521	8.91e-104	0.67919	0.58	0.293	5.06e-99	2	Gm29521
Cnn3	4.22e-103	0.57021	0.915	0.817	2.4e-98	2	Cnn3
Nrcam	1.1e-102	0.67633	0.689	0.444	6.26e-98	2	Nrcam
1110032F04Rik	5.22e-102	0.473585	0.296	0.094	2.96e-97	2	1110032F04Rik
Aldoa	1.11e-101	0.62975	0.921	0.815	6.31e-97	2	Aldoa
Kitl	1.98e-101	0.649561	0.587	0.305	1.12e-96	2	Kitl
Tmbim6	2.75e-101	0.518722	0.945	0.881	1.56e-96	2	Tmbim6
Cntn1	8.97e-101	0.571815	0.578	0.307	5.09e-96	2	Cntn1
Col9a3	1.17e-100	0.703271	0.767	0.538	6.64e-96	2	Col9a3
Smpdl3a	2.02e-100	0.605312	0.549	0.275	1.15e-95	2	Smpdl3a
3110082J24Rik	2.26e-100	0.51191	0.387	0.151	1.28e-95	2	3110082J24Rik
Vgll4	4.11e-100	0.681666	0.668	0.45	2.33e-95	2	Vgll4
Pcp4l1	1.36e-99	0.654901	0.546	0.251	7.7e-95	2	Pcp4l1
Gpx8	1.38e-99	0.595616	0.783	0.56	7.82e-95	2	Gpx8
Irx5	6.53e-99	0.662068	0.596	0.337	3.7e-94	2	Irx5
Mlc1	1.37e-98	0.536786	0.558	0.268	7.78e-94	2	Mlc1
Tril	2.91e-98	0.659012	0.678	0.402	1.65e-93	2	Tril
Irf2bpl	4.91e-98	0.654318	0.474	0.229	2.79e-93	2	Irf2bpl
Sfxn5	6.19e-97	0.562242	0.462	0.209	3.51e-92	2	Sfxn5
Fez1	2.26e-96	0.526485	0.956	0.835	1.28e-91	2	Fez1
Mgst1	1.2e-95	0.588008	0.799	0.532	6.78e-91	2	Mgst1
Rgma	1.93e-95	0.610473	0.639	0.368	1.09e-90	2	Rgma
Lpar1	1.67e-94	0.543123	0.368	0.144	9.46e-90	2	Lpar1
Fgfr2	4.28e-94	0.52748	0.374	0.149	2.43e-89	2	Fgfr2
Shisa9	1.71e-93	0.489948	0.334	0.122	9.71e-89	2	Shisa9
Notch1	2.81e-93	0.667275	0.621	0.377	1.59e-88	2	Notch1
Emc7	9.37e-92	0.547081	0.847	0.715	5.32e-87	2	Emc7
Abcb9	3.79e-91	0.649369	0.614	0.364	2.15e-86	2	Abcb9
Abca1	6.49e-91	0.56787	0.428	0.187	3.68e-86	2	Abca1
Ass1	1.37e-90	0.758387	0.383	0.155	7.79e-86	2	Ass1
Kif21a	1.68e-88	0.59486	0.776	0.535	9.55e-84	2	Kif21a
Nat8f1	1.17e-87	0.439393	0.253	0.079	6.62e-83	2	Nat8f1
Cacng4	1.54e-87	0.703642	0.661	0.413	8.73e-83	2	Cacng4
Nebl	5.45e-87	0.424962	0.287	0.097	3.09e-82	2	Nebl
Clrn1	8.59e-87	0.553386	0.357	0.142	4.87e-82	2	Clrn1
Cxcr4	1.13e-86	0.565185	0.391	0.177	6.44e-82	2	Cxcr4
Gm5089	1.52e-86	0.651579	0.83	0.72	8.65e-82	2	Gm5089
Slc22a17	7.94e-86	0.578366	0.77	0.581	4.5e-81	2	Slc22a17
Gnb4	3.6e-85	0.614012	0.683	0.472	2.04e-80	2	Gnb4
Syt1	3.99e-85	0.659707	0.555	0.322	2.26e-80	2	Syt1
Opcml	7.29e-85	0.490718	0.376	0.158	4.14e-80	2	Opcml
Zcchc24	4.97e-84	0.52335	0.546	0.296	2.82e-79	2	Zcchc24
1700086L19Rik	6.27e-84	0.839254	0.593	0.359	3.56e-79	2	1700086L19Rik
2810459M11Rik	2.46e-83	0.515531	0.356	0.145	1.4e-78	2	2810459M11Rik
Spcs2	4.25e-83	0.43617	0.974	0.934	2.41e-78	2	Spcs2
Spock2	8.6e-83	0.562979	0.427	0.201	4.88e-78	2	Spock2
Rhoc	9.13e-83	0.546986	0.708	0.455	5.18e-78	2	Rhoc
Kcnj10	1.2e-82	0.454871	0.357	0.145	6.81e-78	2	Kcnj10
Gadd45g	1.62e-82	0.972427	0.82	0.701	9.17e-78	2	Gadd45g
Lrig1	1.75e-82	0.547255	0.465	0.233	9.96e-78	2	Lrig1
Ctso	2.2e-82	0.506785	0.427	0.202	1.25e-77	2	Ctso
Tmem59	3.63e-82	0.450563	0.941	0.872	2.06e-77	2	Tmem59
Slc30a10	6.36e-82	0.495898	0.415	0.189	3.61e-77	2	Slc30a10
Tmem47	1.32e-81	0.525879	0.641	0.413	7.49e-77	2	Tmem47
Tsc22d4	2.63e-81	0.582608	0.573	0.354	1.49e-76	2	Tsc22d4
Cpne8	1.26e-80	0.50232	0.34	0.138	7.17e-76	2	Cpne8
Maff	2.82e-80	0.635839	0.388	0.18	1.6e-75	2	Maff
Mt2	5.62e-80	0.586932	0.629	0.377	3.19e-75	2	Mt2
Klf3	8.6e-80	0.618565	0.58	0.358	4.88e-75	2	Klf3
Sox6	9.04e-80	0.485052	0.439	0.208	5.13e-75	2	Sox6
Efhd1	1.91e-79	0.452434	0.302	0.115	1.09e-74	2	Efhd1
Spry1	5.05e-79	0.610617	0.486	0.261	2.87e-74	2	Spry1
Wif1	9.93e-79	0.650343	0.337	0.137	5.64e-74	2	Wif1
Serpine2	2.61e-78	0.553636	0.841	0.629	1.48e-73	2	Serpine2
Angptl4	3.39e-78	0.535193	0.387	0.173	1.92e-73	2	Angptl4
Klf15	1.06e-77	0.505298	0.37	0.163	5.99e-73	2	Klf15
Slc27a1	1.25e-77	0.49354	0.381	0.172	7.07e-73	2	Slc27a1
Unc119	1.6e-77	0.594758	0.659	0.467	9.09e-73	2	Unc119
Ptpra	1.71e-77	0.550213	0.767	0.623	9.7e-73	2	Ptpra
Mdfi	7.14e-77	0.419704	0.259	0.089	4.05e-72	2	Mdfi
Cd151	1.66e-76	0.532087	0.501	0.275	9.4e-72	2	Cd151
Ier3	2.36e-76	0.946454	0.546	0.329	1.34e-71	2	Ier3
Serpinh1	8.12e-76	0.444366	0.857	0.696	4.61e-71	2	Serpinh1
S100b	1.24e-75	0.551676	0.341	0.142	7.03e-71	2	S100b
Scube2	2.8e-74	0.560557	0.346	0.146	1.59e-69	2	Scube2
Npy	1.66e-73	0.722726	0.299	0.115	9.44e-69	2	Npy
Dip2b	2.04e-73	0.551526	0.66	0.479	1.16e-68	2	Dip2b
Lix1l	3.66e-73	0.533069	0.494	0.276	2.08e-68	2	Lix1l
Irx2	4.87e-73	0.574721	0.549	0.337	2.76e-68	2	Irx2
Itih5	1.06e-72	0.307455	0.333	0.137	6e-68	2	Itih5
Eci2	1.37e-72	0.489813	0.861	0.788	7.78e-68	2	Eci2
Vps37b	5.03e-72	0.510379	0.927	0.847	2.86e-67	2	Vps37b
Pax3	5.49e-72	0.504218	0.764	0.54	3.11e-67	2	Pax3
Pdlim4	5.64e-72	0.569271	0.677	0.46	3.2e-67	2	Pdlim4
Thrsp	1.21e-71	0.691787	0.43	0.22	6.88e-67	2	Thrsp
Pfn2	2.65e-71	0.49366	0.901	0.84	1.5e-66	2	Pfn2
Jam2	6.71e-71	0.49138	0.625	0.399	3.81e-66	2	Jam2
Pon2	1.69e-70	0.498214	0.663	0.428	9.6e-66	2	Pon2
Ccser2	2.58e-70	0.582392	0.629	0.444	1.47e-65	2	Ccser2
Clec3b	3.13e-70	0.458561	0.363	0.158	1.78e-65	2	Clec3b
Slc13a5	3.3e-70	0.372315	0.25	0.088	1.87e-65	2	Slc13a5
Efhd2	4.3e-70	0.561803	0.626	0.417	2.44e-65	2	Efhd2
Pdpn	4.59e-70	0.486396	0.444	0.229	2.6e-65	2	Pdpn
Omg	1.44e-69	0.404009	0.282	0.108	8.17e-65	2	Omg
Thra	3.22e-68	0.495472	0.77	0.605	1.83e-63	2	Thra
Ppp1r1a	1.9e-67	0.598294	0.603	0.42	1.08e-62	2	Ppp1r1a
Adgrb1	2.31e-67	0.516007	0.527	0.317	1.31e-62	2	Adgrb1
Hsdl2	2.81e-67	0.517765	0.54	0.339	1.6e-62	2	Hsdl2
Atp1b2	3.04e-67	0.47912	0.443	0.228	1.72e-62	2	Atp1b2
Pigt	3.2e-67	0.508395	0.74	0.576	1.82e-62	2	Pigt
Prxl2a	6.02e-67	0.498056	0.68	0.493	3.42e-62	2	Prxl2a
Megf10	8.37e-67	0.350513	0.265	0.1	4.75e-62	2	Megf10
Nes	1.28e-66	0.565207	0.618	0.4	7.28e-62	2	Nes
Psph	2.63e-66	0.516024	0.645	0.461	1.49e-61	2	Psph
Pnisr	5.59e-66	0.509021	0.847	0.767	3.17e-61	2	Pnisr
Atraid	5.96e-66	0.517646	0.818	0.729	3.38e-61	2	Atraid
Agt	5.72e-65	0.376903	0.176	0.05	3.25e-60	2	Agt
Paqr6	9.66e-65	0.278226	0.125	0.027	5.48e-60	2	Paqr6
Acaa2	1.32e-64	0.506564	0.554	0.354	7.47e-60	2	Acaa2
Prex1	4.08e-64	0.453308	0.477	0.266	2.32e-59	2	Prex1
P2rx4	1.07e-63	0.412867	0.293	0.123	6.1e-59	2	P2rx4
Zfp36l2	1.23e-63	0.597154	0.486	0.291	6.96e-59	2	Zfp36l2
Ebpl	1.46e-63	0.515315	0.648	0.479	8.29e-59	2	Ebpl
Ccdc80	1.59e-63	0.456565	0.328	0.145	9.03e-59	2	Ccdc80
Il33	2.57e-63	0.396193	0.211	0.071	1.46e-58	2	Il33
Spon1	2.62e-63	0.393136	0.323	0.138	1.49e-58	2	Spon1
Agpat3	3.49e-63	0.498182	0.759	0.66	1.98e-58	2	Agpat3
Il17rd	5.65e-63	0.455372	0.331	0.151	3.21e-58	2	Il17rd
Dnajb1	9.05e-63	1.08274	0.682	0.571	5.14e-58	2	Dnajb1
Mtarc2	1.76e-62	0.480437	0.723	0.576	1e-57	2	Mtarc2
Cbs	2.07e-62	0.402607	0.329	0.147	1.17e-57	2	Cbs
Wnt3	9.15e-62	0.421263	0.279	0.115	5.19e-57	2	Wnt3
Rhob	1.58e-61	0.659327	0.794	0.666	8.94e-57	2	Rhob
Lfng	2.61e-61	0.507734	0.501	0.293	1.48e-56	2	Lfng
Ech1	2.76e-61	0.480389	0.732	0.588	1.57e-56	2	Ech1
Timp3	4.17e-61	0.561358	0.466	0.269	2.37e-56	2	Timp3
Fzd1	8.69e-61	0.557274	0.48	0.285	4.93e-56	2	Fzd1
Nfkbiz	1.54e-60	0.271579	0.261	0.104	8.73e-56	2	Nfkbiz
Irs2	2.16e-60	0.556946	0.438	0.253	1.22e-55	2	Irs2
Prr7	6.19e-60	0.525451	0.53	0.334	3.51e-55	2	Prr7
Asah1	2.02e-59	0.484898	0.617	0.433	1.15e-54	2	Asah1
Eif1b	2.66e-59	0.436759	0.931	0.887	1.51e-54	2	Eif1b
Dbndd2	2.9e-59	0.411306	0.296	0.127	1.64e-54	2	Dbndd2
Selenof	4.74e-59	0.32404	0.99	0.986	2.69e-54	2	Selenof
Irf2bp2	1.35e-58	0.538155	0.568	0.405	7.64e-54	2	Irf2bp2
Pygb	4.94e-58	0.430706	0.415	0.225	2.81e-53	2	Pygb
Ak1	5.58e-58	0.428378	0.349	0.169	3.16e-53	2	Ak1
Dusp11	7.41e-58	0.510966	0.733	0.635	4.21e-53	2	Dusp11
Tcf12	7.8e-58	0.48114	0.793	0.667	4.43e-53	2	Tcf12
Adgrg6	8.94e-58	0.406547	0.349	0.167	5.07e-53	2	Adgrg6
Sox4	1.18e-57	0.408132	0.93	0.858	6.71e-53	2	Sox4
Tnfaip6	1.86e-57	0.487366	0.282	0.124	1.06e-52	2	Tnfaip6
Scrg1	1.94e-57	0.338941	0.291	0.122	1.1e-52	2	Scrg1
Fkbp10	2.04e-57	0.400134	0.34	0.161	1.16e-52	2	Fkbp10
Myorg	2.29e-57	0.31632	0.207	0.072	1.3e-52	2	Myorg
Tob1	3.27e-57	0.583283	0.644	0.498	1.86e-52	2	Tob1
Dtna	4.76e-57	0.397898	0.322	0.15	2.7e-52	2	Dtna
Cnpy1	7.05e-57	0.528804	0.52	0.332	4e-52	2	Cnpy1
Gnao1	7.15e-57	0.493715	0.467	0.282	4.06e-52	2	Gnao1
Mras	1.29e-56	0.503863	0.516	0.336	7.34e-52	2	Mras
Ddt	4.9e-56	0.45434	0.765	0.666	2.78e-51	2	Ddt
Cacng5	5.07e-56	0.366484	0.259	0.107	2.88e-51	2	Cacng5
Egfl6	5.36e-56	0.406991	0.259	0.106	3.04e-51	2	Egfl6
Ncald	1.6e-55	0.415554	0.657	0.46	9.06e-51	2	Ncald
Tmed10	2.77e-55	0.415045	0.881	0.813	1.57e-50	2	Tmed10
Vldlr	6.13e-55	0.531247	0.488	0.298	3.48e-50	2	Vldlr
Sash1	6.51e-55	0.474814	0.479	0.293	3.69e-50	2	Sash1
Gask1b	8.98e-55	0.278393	0.151	0.044	5.1e-50	2	Gask1b
Acsbg1	9.11e-55	0.34915	0.369	0.183	5.17e-50	2	Acsbg1
Mcc	1.09e-54	0.361168	0.276	0.121	6.17e-50	2	Mcc
Saraf	1.57e-54	0.455796	0.721	0.605	8.9e-50	2	Saraf
Sned1	1.75e-54	0.351272	0.263	0.11	9.92e-50	2	Sned1
Tspan6	2.32e-54	0.403308	0.885	0.803	1.32e-49	2	Tspan6
Msi2	3.55e-54	0.486838	0.67	0.515	2.01e-49	2	Msi2
Mpst	5.11e-54	0.48322	0.659	0.524	2.9e-49	2	Mpst
Oat	2.57e-53	0.467589	0.735	0.606	1.46e-48	2	Oat
S100a13	5.16e-53	0.403799	0.424	0.24	2.93e-48	2	S100a13
Slc25a18	2.96e-52	0.435396	0.422	0.229	1.68e-47	2	Slc25a18
Dnaaf9	5.88e-52	0.429827	0.369	0.2	3.33e-47	2	Dnaaf9
Cd302	9.55e-52	0.438753	0.409	0.232	5.42e-47	2	Cd302
Adgra1	9.85e-52	0.420483	0.298	0.141	5.59e-47	2	Adgra1
Mybpc1	1.5e-51	0.418573	0.241	0.099	8.5e-47	2	Mybpc1
Canx	2.46e-51	0.386883	0.885	0.832	1.4e-46	2	Canx
Mir9-3hg	6.54e-51	0.469109	0.741	0.619	3.71e-46	2	Mir9-3hg
Ptp4a3	1.36e-50	0.506053	0.493	0.312	7.7e-46	2	Ptp4a3
Gm29478	1.87e-50	0.415322	0.255	0.112	1.06e-45	2	Gm29478
Sar1b	2.18e-50	0.38365	0.866	0.832	1.24e-45	2	Sar1b
Pde4b	3.81e-50	0.376248	0.302	0.144	2.16e-45	2	Pde4b
Sox1ot	5.85e-50	0.458045	0.356	0.185	3.32e-45	2	Sox1ot
Nos1ap	6.36e-50	0.344902	0.229	0.094	3.61e-45	2	Nos1ap
Cldn10	1.87e-49	0.285078	0.24	0.1	1.06e-44	2	Cldn10
Lmbrd1	2.3e-49	0.415148	0.446	0.273	1.3e-44	2	Lmbrd1
Gas6	3.7e-49	0.376447	0.37	0.2	2.1e-44	2	Gas6
Maged2	4.89e-49	0.382368	0.799	0.681	2.77e-44	2	Maged2
Rnf13	6.17e-49	0.464583	0.555	0.401	3.5e-44	2	Rnf13
Myh8	6.29e-49	0.356937	0.144	0.044	3.57e-44	2	Myh8
Ttyh3	7.07e-49	0.43708	0.662	0.527	4.01e-44	2	Ttyh3
Slc3a2	8.73e-49	0.402157	0.848	0.783	4.96e-44	2	Slc3a2
Cpne2	1.03e-48	0.412582	0.367	0.194	5.84e-44	2	Cpne2
Spag9	1.14e-48	0.422098	0.759	0.66	6.44e-44	2	Spag9
Mageh1	1.17e-48	0.459473	0.718	0.608	6.67e-44	2	Mageh1
Pgrmc1	1.53e-48	0.420869	0.791	0.698	8.69e-44	2	Pgrmc1
Pcdh10	2.67e-48	0.418443	0.462	0.287	1.51e-43	2	Pcdh10
0610040J01Rik	6.69e-48	0.321905	0.189	0.07	3.8e-43	2	0610040J01Rik
Hmgcs1	1.6e-47	0.563588	0.702	0.578	9.1e-43	2	Hmgcs1
Plec	1.95e-47	0.385769	0.354	0.188	1.1e-42	2	Plec
Mocs2	2.39e-47	0.424231	0.744	0.671	1.36e-42	2	Mocs2
A830029E22Rik	4.2e-47	0.482115	0.288	0.131	2.38e-42	2	A830029E22Rik
Meis1	5.99e-47	0.471178	0.695	0.585	3.4e-42	2	Meis1
Dach1	6.61e-47	0.477902	0.474	0.313	3.75e-42	2	Dach1
Gstm5	9.1e-47	0.413574	0.857	0.804	5.16e-42	2	Gstm5
Col2a1	1.03e-46	0.326569	0.256	0.113	5.83e-42	2	Col2a1
Pgm5	1.32e-46	0.311804	0.175	0.062	7.52e-42	2	Pgm5
Rdh14	1.36e-46	0.423913	0.458	0.297	7.71e-42	2	Rdh14
Nr4a1	1.39e-46	0.379629	0.271	0.126	7.88e-42	2	Nr4a1
Nog	1.56e-46	0.405446	0.268	0.125	8.83e-42	2	Nog
Wscd1	2.26e-46	0.411946	0.672	0.528	1.28e-41	2	Wscd1
Kcnn3	3.26e-46	0.341378	0.216	0.089	1.85e-41	2	Kcnn3
Cebpa	1.63e-45	0.39184	0.226	0.096	9.25e-41	2	Cebpa
Spred1	1.68e-45	0.443326	0.549	0.398	9.51e-41	2	Spred1
Ndufc2	2.29e-45	0.327164	0.977	0.976	1.3e-40	2	Ndufc2
Cyb5a	3.22e-45	0.382823	0.817	0.755	1.83e-40	2	Cyb5a
Abcd3	3.49e-45	0.419118	0.543	0.387	1.98e-40	2	Abcd3
Khdrbs2	3.68e-45	0.470514	0.318	0.168	2.09e-40	2	Khdrbs2
Eps15	3.99e-45	0.485538	0.445	0.296	2.26e-40	2	Eps15
Sirt2	5.48e-45	0.396865	0.667	0.563	3.11e-40	2	Sirt2
Gjc3	1.18e-44	0.269097	0.134	0.041	6.72e-40	2	Gjc3
Pcdh9	1.27e-44	0.39831	0.334	0.182	7.23e-40	2	Pcdh9
Camk2n1	1.28e-44	0.526153	0.608	0.43	7.27e-40	2	Camk2n1
Dad1	1.99e-44	0.314982	0.938	0.92	1.13e-39	2	Dad1
Sdf2	3.05e-44	0.409466	0.678	0.569	1.73e-39	2	Sdf2
Stk32a	6.97e-44	0.385797	0.255	0.117	3.95e-39	2	Stk32a
Slc1a4	1.15e-43	0.41761	0.402	0.242	6.54e-39	2	Slc1a4
Scg3	1.22e-43	0.405656	0.789	0.71	6.94e-39	2	Scg3
Cpxm1	1.91e-43	0.318855	0.315	0.161	1.08e-38	2	Cpxm1
Gng11	2.85e-43	0.315432	0.359	0.196	1.62e-38	2	Gng11
Trp53cor1	4e-43	0.346339	0.188	0.074	2.27e-38	2	Trp53cor1
Dok6	4.28e-43	0.279483	0.199	0.08	2.43e-38	2	Dok6
Selenos	5.36e-43	0.392165	0.783	0.689	3.04e-38	2	Selenos
Acadm	9.3e-43	0.429211	0.576	0.432	5.28e-38	2	Acadm
Tprgl	1.53e-42	0.390434	0.737	0.665	8.66e-38	2	Tprgl
Gdpd2	1.79e-42	0.254899	0.178	0.067	1.02e-37	2	Gdpd2
Thbs3	2.04e-42	0.325271	0.249	0.116	1.16e-37	2	Thbs3
Clip1	4.29e-42	0.402998	0.386	0.228	2.43e-37	2	Clip1
Arid5b	1.12e-41	0.412769	0.439	0.278	6.36e-37	2	Arid5b
Lrba	1.27e-41	0.447519	0.41	0.257	7.21e-37	2	Lrba
Pfkl	2.73e-41	0.416522	0.428	0.275	1.55e-36	2	Pfkl
Dab1	3.37e-41	0.410362	0.388	0.227	1.91e-36	2	Dab1
Sorl1	3.65e-41	0.274375	0.196	0.081	2.07e-36	2	Sorl1
Snta1	3.74e-41	0.340807	0.306	0.162	2.12e-36	2	Snta1
Srebf1	6.94e-41	0.427943	0.432	0.284	3.94e-36	2	Srebf1
4931406C07Rik	7.17e-41	0.361906	0.34	0.191	4.07e-36	2	4931406C07Rik
Rgs20	1.16e-40	0.410015	0.401	0.251	6.58e-36	2	Rgs20
Mafb	1.63e-40	0.505136	0.299	0.16	9.28e-36	2	Mafb
Vta1	3.83e-40	0.378291	0.778	0.713	2.17e-35	2	Vta1
Arap2	4.73e-40	0.309616	0.264	0.128	2.68e-35	2	Arap2
Gabarap	6.21e-40	0.26898	0.964	0.966	3.52e-35	2	Gabarap
Cd44	1.3e-39	0.331677	0.253	0.123	7.36e-35	2	Cd44
Arc	1.34e-39	0.531465	0.189	0.079	7.63e-35	2	Arc
Dtx4	1.35e-39	0.335011	0.245	0.117	7.67e-35	2	Dtx4
Plce1	2.45e-39	0.293238	0.249	0.119	1.39e-34	2	Plce1
Thbs2	3.76e-39	0.256549	0.153	0.056	2.13e-34	2	Thbs2
Nedd9	4.08e-39	0.359626	0.27	0.137	2.31e-34	2	Nedd9
Naaa	6.18e-39	0.263182	0.225	0.1	3.51e-34	2	Naaa
Sox8	7e-39	0.345074	0.315	0.168	3.97e-34	2	Sox8
Hsd17b12	8.34e-39	0.358057	0.756	0.681	4.73e-34	2	Hsd17b12
Rftn2	1e-38	0.382464	0.356	0.208	5.68e-34	2	Rftn2
Dcxr	1.14e-38	0.428091	0.317	0.175	6.45e-34	2	Dcxr
Col4a5	1.61e-38	0.314299	0.331	0.183	9.14e-34	2	Col4a5
Gstm7	1.82e-38	0.305549	0.254	0.125	1.03e-33	2	Gstm7
Pex7	1.85e-38	0.387198	0.442	0.301	1.05e-33	2	Pex7
Fbxo44	2.66e-38	0.320338	0.253	0.123	1.51e-33	2	Fbxo44
Fam181a	2.68e-38	0.319131	0.23	0.107	1.52e-33	2	Fam181a
Ctnnd2	2.7e-38	0.414321	0.481	0.337	1.53e-33	2	Ctnnd2
Rab34	2.97e-38	0.468693	0.552	0.425	1.69e-33	2	Rab34
Pex2	5.16e-38	0.38086	0.64	0.54	2.93e-33	2	Pex2
Cfap100	5.23e-38	0.350643	0.262	0.132	2.97e-33	2	Cfap100
Notch3	5.62e-38	0.295094	0.253	0.123	3.19e-33	2	Notch3
Gabra4	5.82e-38	0.370061	0.314	0.175	3.3e-33	2	Gabra4
Bambi	1.35e-37	0.555012	0.332	0.203	7.66e-33	2	Bambi
Srgap3	1.48e-37	0.376697	0.416	0.266	8.37e-33	2	Srgap3
Sdc4	1.74e-37	0.320966	0.305	0.166	9.86e-33	2	Sdc4
Selenbp1	1.77e-37	0.358322	0.345	0.199	1e-32	2	Selenbp1
Mapre3	2.59e-37	0.369194	0.382	0.236	1.47e-32	2	Mapre3
Ppt1	2.74e-37	0.395784	0.474	0.338	1.55e-32	2	Ppt1
Degs1	3.33e-37	0.396613	0.493	0.352	1.89e-32	2	Degs1
Tacc1	4.06e-37	0.386832	0.439	0.292	2.31e-32	2	Tacc1
Nrbp2	7.36e-37	0.35761	0.305	0.167	4.18e-32	2	Nrbp2
Sec62	9.97e-37	0.334376	0.884	0.856	5.66e-32	2	Sec62
Cadm4	1.33e-36	0.409056	0.505	0.359	7.57e-32	2	Cadm4
Abat	2.07e-36	0.337923	0.47	0.312	1.17e-31	2	Abat
Pcsk1n	2.52e-36	0.310168	0.6	0.436	1.43e-31	2	Pcsk1n
Cdh6	2.85e-36	0.283648	0.22	0.102	1.62e-31	2	Cdh6
Nckap5	4.68e-36	0.270763	0.176	0.073	2.66e-31	2	Nckap5
Itga6	1.13e-35	0.342277	0.324	0.186	6.42e-31	2	Itga6
Prss23	1.2e-35	0.318756	0.32	0.177	6.82e-31	2	Prss23
Pgpep1	1.59e-35	0.37171	0.4	0.251	9.05e-31	2	Pgpep1
Igsf3	1.84e-35	0.411691	0.427	0.293	1.05e-30	2	Igsf3
Wwtr1	1.99e-35	0.354859	0.363	0.222	1.13e-30	2	Wwtr1
F3	3.47e-35	0.252832	0.154	0.06	1.97e-30	2	F3
Cdh11	3.54e-35	0.371458	0.351	0.208	2.01e-30	2	Cdh11
Cdh22	3.78e-35	0.306878	0.253	0.128	2.14e-30	2	Cdh22
Gria3	3.87e-35	0.367726	0.286	0.156	2.19e-30	2	Gria3
Plin3	4.58e-35	0.371108	0.328	0.193	2.6e-30	2	Plin3
Gm13889	5.22e-35	0.647376	0.337	0.2	2.96e-30	2	Gm13889
Tgfb2	6.02e-35	0.433165	0.39	0.258	3.42e-30	2	Tgfb2
Frat2	9.75e-35	0.54085	0.412	0.285	5.53e-30	2	Frat2
Orai1	1.19e-34	0.390335	0.384	0.246	6.75e-30	2	Orai1
Fam118a	1.21e-34	0.354359	0.285	0.161	6.85e-30	2	Fam118a
Hsd17b10	1.38e-34	0.327901	0.793	0.751	7.86e-30	2	Hsd17b10
Wipf2	1.41e-34	0.337497	0.257	0.136	7.99e-30	2	Wipf2
Rassf2	1.52e-34	0.323243	0.282	0.154	8.62e-30	2	Rassf2
Lmcd1	1.84e-34	0.514549	0.429	0.29	1.04e-29	2	Lmcd1
Tagln2	1.84e-34	0.288976	0.487	0.311	1.05e-29	2	Tagln2
Gdf15	2.48e-34	0.560317	0.137	0.05	1.41e-29	2	Gdf15
Ergic3	2.87e-34	0.342297	0.801	0.751	1.63e-29	2	Ergic3
Rasa2	3.53e-34	0.374106	0.352	0.219	2e-29	2	Rasa2
Rab9	4.97e-34	0.394274	0.681	0.617	2.82e-29	2	Rab9
Otud1	5.53e-34	0.36597	0.254	0.133	3.14e-29	2	Otud1
Egr3	5.95e-34	0.305465	0.193	0.087	3.38e-29	2	Egr3
Phlda3	7.04e-34	0.505243	0.355	0.22	4e-29	2	Phlda3
Cdkn1a	1.16e-33	0.651723	0.511	0.381	6.59e-29	2	Cdkn1a
Stk10	1.31e-33	0.250581	0.182	0.08	7.46e-29	2	Stk10
Lrp1	1.79e-33	0.269262	0.451	0.289	1.02e-28	2	Lrp1
Lpcat3	1.91e-33	0.341609	0.365	0.229	1.08e-28	2	Lpcat3
Prrx1	2.55e-33	0.259818	0.206	0.095	1.45e-28	2	Prrx1
Gde1	2.98e-33	0.327778	0.738	0.673	1.69e-28	2	Gde1
AI593442	4.53e-33	0.29896	0.231	0.114	2.57e-28	2	AI593442
Rasa3	5.28e-33	0.374654	0.448	0.313	2.99e-28	2	Rasa3
Desi2	1.47e-32	0.37252	0.702	0.643	8.33e-28	2	Desi2
ENSMUSG00000120563	1.49e-32	0.411509	0.278	0.16	8.48e-28	2	ENSMUSG00000120563
Macir	1.54e-32	0.324779	0.294	0.168	8.75e-28	2	Macir
Cdc42ep1	1.78e-32	0.292683	0.21	0.102	1.01e-27	2	Cdc42ep1
Shisa4	1.79e-32	0.361835	0.451	0.319	1.02e-27	2	Shisa4
Txndc15	2.27e-32	0.362802	0.655	0.569	1.29e-27	2	Txndc15
Commd6	2.4e-32	0.372263	0.68	0.624	1.36e-27	2	Commd6
C1qtnf6	2.91e-32	0.290534	0.22	0.11	1.65e-27	2	C1qtnf6
Ubc	3.77e-32	0.27099	0.961	0.947	2.14e-27	2	Ubc
Pttg1ip	4.14e-32	0.383682	0.541	0.428	2.35e-27	2	Pttg1ip
Lpin2	4.93e-32	0.404112	0.532	0.416	2.8e-27	2	Lpin2
Dkk3	5.53e-32	0.34816	0.319	0.187	3.14e-27	2	Dkk3
Dars	7.27e-32	0.399696	0.625	0.542	4.12e-27	2	Dars
Irx3	8.4e-32	0.313989	0.257	0.137	4.77e-27	2	Irx3
Aldh6a1	9.73e-32	0.280419	0.228	0.116	5.52e-27	2	Aldh6a1
Ssbp2	1.11e-31	0.381593	0.55	0.45	6.32e-27	2	Ssbp2
Kcne1l	1.33e-31	0.411165	0.674	0.588	7.55e-27	2	Kcne1l
Vcam1	3.05e-31	0.286362	0.278	0.151	1.73e-26	2	Vcam1
Tspan15	3.14e-31	0.334656	0.322	0.194	1.78e-26	2	Tspan15
Akap8l	3.3e-31	0.388788	0.416	0.294	1.87e-26	2	Akap8l
Dmd	3.84e-31	0.315533	0.26	0.142	2.18e-26	2	Dmd
Daam2	4.48e-31	0.278383	0.184	0.084	2.54e-26	2	Daam2
Kctd12	5.98e-31	0.325863	0.334	0.206	3.39e-26	2	Kctd12
Mxd4	6.84e-31	0.354776	0.466	0.33	3.88e-26	2	Mxd4
6330403K07Rik	7.5e-31	0.360097	0.651	0.521	4.26e-26	2	6330403K07Rik
Bax	1.25e-30	0.342392	0.942	0.934	7.07e-26	2	Bax
Adgrb2	1.26e-30	0.334146	0.412	0.275	7.13e-26	2	Adgrb2
Sesn3	1.56e-30	0.363904	0.504	0.381	8.84e-26	2	Sesn3
Arhgef26	1.93e-30	0.345112	0.342	0.213	1.1e-25	2	Arhgef26
Il18	2.75e-30	0.271425	0.223	0.112	1.56e-25	2	Il18
Rcn2	6.84e-30	0.309238	0.79	0.742	3.88e-25	2	Rcn2
Rab6b	8.71e-30	0.361156	0.589	0.484	4.94e-25	2	Rab6b
Ssbp4	1.02e-29	0.286751	0.648	0.539	5.81e-25	2	Ssbp4
Pex13	1.53e-29	0.343748	0.575	0.478	8.7e-25	2	Pex13
Arhgef9	1.8e-29	0.318223	0.306	0.185	1.02e-24	2	Arhgef9
Tmem38a	2.31e-29	0.319078	0.276	0.159	1.31e-24	2	Tmem38a
Bhlhe41	2.47e-29	0.292919	0.206	0.104	1.4e-24	2	Bhlhe41
Rsu1	6.14e-29	0.361469	0.567	0.475	3.48e-24	2	Rsu1
Csmd2	6.83e-29	0.274894	0.189	0.091	3.88e-24	2	Csmd2
Acox1	7.11e-29	0.321341	0.334	0.21	4.03e-24	2	Acox1
Rest	7.85e-29	0.350379	0.377	0.255	4.45e-24	2	Rest
Ophn1	7.98e-29	0.351262	0.376	0.249	4.53e-24	2	Ophn1
Arhgap21	9.28e-29	0.342662	0.567	0.456	5.26e-24	2	Arhgap21
Prex2	1.06e-28	0.321452	0.306	0.186	6e-24	2	Prex2
Shroom3	1.12e-28	0.294477	0.224	0.115	6.37e-24	2	Shroom3
Cry2	1.3e-28	0.324772	0.288	0.174	7.36e-24	2	Cry2
Mgmt	1.56e-28	0.314776	0.23	0.123	8.85e-24	2	Mgmt
Sox5	1.6e-28	0.347	0.315	0.197	9.06e-24	2	Sox5
Rtn3	2.14e-28	0.254435	0.909	0.897	1.22e-23	2	Rtn3
Ssr3	2.45e-28	0.300013	0.792	0.747	1.39e-23	2	Ssr3
Jakmip2	2.96e-28	0.381683	0.447	0.335	1.68e-23	2	Jakmip2
Atp6v0e	3.1e-28	0.304459	0.79	0.765	1.76e-23	2	Atp6v0e
Aamdc	3.33e-28	0.36109	0.515	0.413	1.89e-23	2	Aamdc
Tcf7l2	6.21e-28	0.339524	0.344	0.223	3.53e-23	2	Tcf7l2
Magt1	8.51e-28	0.362396	0.485	0.365	4.83e-23	2	Magt1
Tmem106b	1.09e-27	0.356523	0.439	0.325	6.2e-23	2	Tmem106b
Dusp6	1.27e-27	0.400457	0.484	0.38	7.21e-23	2	Dusp6
Lrrc4b	1.47e-27	0.326418	0.458	0.335	8.33e-23	2	Lrrc4b
Unc50	2.57e-27	0.337969	0.627	0.558	1.46e-22	2	Unc50
Atp1a1	3.36e-27	0.323641	0.68	0.598	1.91e-22	2	Atp1a1
Cldnd1	4.12e-27	0.3084	0.709	0.662	2.34e-22	2	Cldnd1
Fam214b	5.36e-27	0.257573	0.235	0.128	3.04e-22	2	Fam214b
Tpp1	6.04e-27	0.312404	0.346	0.228	3.43e-22	2	Tpp1
Slc6a1	7.47e-27	0.27155	0.28	0.164	4.24e-22	2	Slc6a1
Fscn1	7.5e-27	0.290926	0.864	0.775	4.26e-22	2	Fscn1
Gucy1b1	9.34e-27	0.314406	0.299	0.185	5.3e-22	2	Gucy1b1
Acbd5	1.09e-26	0.3533	0.398	0.289	6.2e-22	2	Acbd5
2610035D17Rik	1.49e-26	0.29896	0.213	0.115	8.43e-22	2	2610035D17Rik
Slc35f1	1.85e-26	0.270784	0.27	0.157	1.05e-21	2	Slc35f1
Sgcb	1.87e-26	0.375441	0.466	0.362	1.06e-21	2	Sgcb
Cox6b2	2.1e-26	0.455392	0.28	0.168	1.19e-21	2	Cox6b2
Gfap	2.36e-26	0.267602	0.133	0.055	1.34e-21	2	Gfap
Ncam2	2.57e-26	0.280911	0.224	0.121	1.46e-21	2	Ncam2
Etv5	2.65e-26	0.308222	0.34	0.22	1.51e-21	2	Etv5
Hspa1a	3.47e-26	0.44879	0.103	0.038	1.97e-21	2	Hspa1a
Scrn1	3.83e-26	0.327836	0.39	0.271	2.17e-21	2	Scrn1
Rabac1	3.92e-26	0.256165	0.782	0.724	2.22e-21	2	Rabac1
Pigs	5.12e-26	0.281713	0.307	0.194	2.9e-21	2	Pigs
Rrbp1	5.67e-26	0.311483	0.672	0.594	3.22e-21	2	Rrbp1
Btd	6.07e-26	0.280784	0.248	0.144	3.44e-21	2	Btd
Trps1	7.24e-26	0.334399	0.386	0.276	4.11e-21	2	Trps1
Tmem121	8.25e-26	0.320748	0.543	0.444	4.68e-21	2	Tmem121
Auts2	1.13e-25	0.387997	0.753	0.709	6.4e-21	2	Auts2
Mn1	1.15e-25	0.291049	0.261	0.153	6.5e-21	2	Mn1
Kank1	1.2e-25	0.329012	0.311	0.199	6.8e-21	2	Kank1
Tmod2	1.31e-25	0.326927	0.535	0.441	7.43e-21	2	Tmod2
Emc2	1.48e-25	0.313735	0.698	0.656	8.4e-21	2	Emc2
Tprkb	1.63e-25	0.360168	0.428	0.327	9.26e-21	2	Tprkb
Ephb1	2.16e-25	0.333685	0.421	0.292	1.23e-20	2	Ephb1
Tmem30a	2.66e-25	0.314968	0.607	0.523	1.51e-20	2	Tmem30a
Pmm1	3.17e-25	0.343099	0.592	0.513	1.8e-20	2	Pmm1
Epdr1	4.34e-25	0.287787	0.294	0.186	2.46e-20	2	Epdr1
Wnt5a	4.73e-25	0.309477	0.431	0.303	2.68e-20	2	Wnt5a
Cyria	6.91e-25	0.270528	0.273	0.166	3.92e-20	2	Cyria
1110065P20Rik	7.5e-25	0.333087	0.635	0.573	4.26e-20	2	1110065P20Rik
Wbp1l	7.84e-25	0.326783	0.317	0.211	4.45e-20	2	Wbp1l
Dynlt3	8.84e-25	0.34811	0.403	0.296	5.02e-20	2	Dynlt3
Ubxn4	9.4e-25	0.301517	0.758	0.724	5.34e-20	2	Ubxn4
Clk1	1.03e-24	0.369933	0.59	0.517	5.84e-20	2	Clk1
Aprt	1.11e-24	0.281957	0.822	0.775	6.3e-20	2	Aprt
Son	1.21e-24	0.255095	0.958	0.944	6.85e-20	2	Son
Zeb2	1.22e-24	0.350198	0.415	0.31	6.91e-20	2	Zeb2
Wnk2	1.52e-24	0.263095	0.228	0.128	8.64e-20	2	Wnk2
Ncam1	1.78e-24	0.28719	0.729	0.645	1.01e-19	2	Ncam1
Camk1	1.79e-24	0.313474	0.389	0.275	1.02e-19	2	Camk1
Rab10	2.83e-24	0.285677	0.784	0.756	1.61e-19	2	Rab10
Cd1d1	3.23e-24	0.354486	0.36	0.254	1.83e-19	2	Cd1d1
Ddrgk1	3.32e-24	0.315564	0.734	0.698	1.88e-19	2	Ddrgk1
Etfb	4.13e-24	0.314041	0.682	0.623	2.35e-19	2	Etfb
Dag1	6.62e-24	0.313533	0.538	0.435	3.76e-19	2	Dag1
Nrarp	7.33e-24	0.309302	0.331	0.214	4.16e-19	2	Nrarp
B430319G15Rik	9.31e-24	0.322251	0.259	0.161	5.28e-19	2	B430319G15Rik
Tceal8	1.14e-23	0.299448	0.762	0.75	6.45e-19	2	Tceal8
Ccdc28b	1.23e-23	0.308389	0.573	0.496	6.96e-19	2	Ccdc28b
Ccs	1.48e-23	0.299702	0.51	0.418	8.4e-19	2	Ccs
Vcl	1.64e-23	0.329645	0.287	0.187	9.29e-19	2	Vcl
Kbtbd11	1.89e-23	0.315936	0.488	0.384	1.07e-18	2	Kbtbd11
Ilvbl	2.22e-23	0.256467	0.277	0.171	1.26e-18	2	Ilvbl
Myo6	3.89e-23	0.272757	0.309	0.199	2.21e-18	2	Myo6
Ufl1	3.93e-23	0.357493	0.414	0.32	2.23e-18	2	Ufl1
Eps8	4.25e-23	0.265184	0.306	0.195	2.41e-18	2	Eps8
Ldlrad3	4.36e-23	0.336349	0.336	0.234	2.48e-18	2	Ldlrad3
Acadvl	4.48e-23	0.327034	0.446	0.349	2.54e-18	2	Acadvl
Tiparp	4.96e-23	0.357363	0.468	0.374	2.81e-18	2	Tiparp
Lactb	6.52e-23	0.294269	0.312	0.207	3.7e-18	2	Lactb
Fbxw9	7.91e-23	0.325814	0.373	0.266	4.49e-18	2	Fbxw9
Fermt2	8.9e-23	0.309616	0.645	0.588	5.05e-18	2	Fermt2
Neat1	1.06e-22	0.251693	0.149	0.071	6.02e-18	2	Neat1
Camk2d	1.38e-22	0.285301	0.256	0.157	7.84e-18	2	Camk2d
Cpped1	1.47e-22	0.297607	0.223	0.132	8.33e-18	2	Cpped1
Itgb8	1.6e-22	0.273876	0.391	0.272	9.09e-18	2	Itgb8
Pdlim5	1.7e-22	0.265779	0.261	0.162	9.63e-18	2	Pdlim5
Arl3	1.74e-22	0.261093	0.804	0.786	9.87e-18	2	Arl3
Slc38a1	1.96e-22	0.296693	0.739	0.698	1.11e-17	2	Slc38a1
Lrrc1	2.04e-22	0.267244	0.226	0.132	1.16e-17	2	Lrrc1
Gadd45b	2.88e-22	0.388551	0.278	0.174	1.63e-17	2	Gadd45b
Slc7a5	3.51e-22	0.334731	0.549	0.472	1.99e-17	2	Slc7a5
Tmem254	4.65e-22	0.316364	0.455	0.361	2.64e-17	2	Tmem254
Kit	6.04e-22	0.315209	0.323	0.218	3.43e-17	2	Kit
Sncaip	6.35e-22	0.281797	0.287	0.186	3.61e-17	2	Sncaip
Dhrs1	9.51e-22	0.320731	0.485	0.409	5.4e-17	2	Dhrs1
Smarcd3	1.54e-21	0.329033	0.379	0.279	8.76e-17	2	Smarcd3
Mtss2	1.55e-21	0.290598	0.426	0.318	8.79e-17	2	Mtss2
Zfp24	1.86e-21	0.305872	0.648	0.6	1.05e-16	2	Zfp24
Ei24	4.21e-21	0.353067	0.616	0.567	2.39e-16	2	Ei24
Crot	6.79e-21	0.318057	0.329	0.233	3.85e-16	2	Crot
Naxd	9.28e-21	0.28124	0.706	0.673	5.26e-16	2	Naxd
Ggh	1.56e-20	0.311167	0.608	0.556	8.85e-16	2	Ggh
Nr3c1	1.7e-20	0.295374	0.378	0.28	9.62e-16	2	Nr3c1
Cdo1	1.89e-20	0.285644	0.369	0.259	1.07e-15	2	Cdo1
Traf4	2.93e-20	0.323721	0.648	0.59	1.66e-15	2	Traf4
Rnf215	2.98e-20	0.301667	0.37	0.273	1.69e-15	2	Rnf215
Dync2li1	3.49e-20	0.272118	0.404	0.309	1.98e-15	2	Dync2li1
Pcdh17	4.84e-20	0.260152	0.299	0.195	2.75e-15	2	Pcdh17
Ccng1	5.69e-20	0.349219	0.274	0.18	3.23e-15	2	Ccng1
Clcn3	6.39e-20	0.29219	0.555	0.486	3.63e-15	2	Clcn3
Apcdd1	7.54e-20	0.31586	0.35	0.252	4.28e-15	2	Apcdd1
Dnajc24	7.72e-20	0.326507	0.602	0.568	4.38e-15	2	Dnajc24
Pmp22	7.78e-20	0.319854	0.456	0.335	4.41e-15	2	Pmp22
Gpm6a	1.31e-19	0.311885	0.649	0.598	7.44e-15	2	Gpm6a
Tmbim4	1.39e-19	0.285654	0.65	0.619	7.91e-15	2	Tmbim4
Dclk2	1.46e-19	0.296157	0.475	0.376	8.27e-15	2	Dclk2
Grk3	1.48e-19	0.281433	0.284	0.188	8.42e-15	2	Grk3
Zic4	1.54e-19	0.327395	0.556	0.484	8.74e-15	2	Zic4
Rida	1.93e-19	0.320984	0.398	0.313	1.09e-14	2	Rida
Pls3	1.95e-19	0.327875	0.421	0.327	1.11e-14	2	Pls3
Plod2	3.45e-19	0.342252	0.363	0.274	1.96e-14	2	Plod2
Pdcd10	3.6e-19	0.279971	0.681	0.661	2.04e-14	2	Pdcd10
Hacd3	3.63e-19	0.306905	0.484	0.403	2.06e-14	2	Hacd3
Tmem223	3.79e-19	0.280407	0.74	0.719	2.15e-14	2	Tmem223
Cavin3	4.15e-19	0.278446	0.726	0.656	2.35e-14	2	Cavin3
Tmem205	6.12e-19	0.28846	0.416	0.325	3.47e-14	2	Tmem205
Soat1	6.72e-19	0.255306	0.316	0.214	3.82e-14	2	Soat1
Nek6	7.02e-19	0.294848	0.387	0.299	3.99e-14	2	Nek6
Sc5d	7.46e-19	0.289551	0.332	0.24	4.23e-14	2	Sc5d
Cat	8.06e-19	0.285604	0.381	0.294	4.58e-14	2	Cat
Zbtb20	8.69e-19	0.281479	0.745	0.693	4.93e-14	2	Zbtb20
Tmem101	1.09e-18	0.295801	0.459	0.382	6.17e-14	2	Tmem101
Hs6st1	1.34e-18	0.276618	0.265	0.177	7.62e-14	2	Hs6st1
Tnrc18	1.72e-18	0.292054	0.361	0.269	9.79e-14	2	Tnrc18
Ddr1	1.8e-18	0.256423	0.553	0.465	1.02e-13	2	Ddr1
Stard3	1.95e-18	0.28652	0.367	0.276	1.11e-13	2	Stard3
Tm2d2	2.51e-18	0.254605	0.807	0.789	1.42e-13	2	Tm2d2
Ucp2	2.93e-18	0.297491	0.336	0.241	1.66e-13	2	Ucp2
Ikbip	2.94e-18	0.253618	0.253	0.165	1.67e-13	2	Ikbip
Prelid2	3.05e-18	0.287185	0.26	0.174	1.73e-13	2	Prelid2
Flot1	3.07e-18	0.296297	0.498	0.421	1.74e-13	2	Flot1
Slc50a1	4.1e-18	0.277363	0.48	0.396	2.32e-13	2	Slc50a1
Bcap31	4.41e-18	0.253153	0.718	0.696	2.5e-13	2	Bcap31
Dhrs4	4.46e-18	0.292865	0.531	0.465	2.53e-13	2	Dhrs4
Scamp2	4.86e-18	0.281296	0.485	0.415	2.76e-13	2	Scamp2
Sypl	5.49e-18	0.28582	0.404	0.317	3.11e-13	2	Sypl
Acads	1.11e-17	0.30325	0.524	0.456	6.28e-13	2	Acads
Lrpap1	1.49e-17	0.270188	0.588	0.526	8.46e-13	2	Lrpap1
Foxo1	1.53e-17	0.271494	0.237	0.154	8.71e-13	2	Foxo1
Ankra2	1.75e-17	0.257872	0.36	0.27	9.93e-13	2	Ankra2
Bmyc	1.81e-17	0.32399	0.605	0.576	1.03e-12	2	Bmyc
Ppp2r3a	2.37e-17	0.274388	0.392	0.297	1.34e-12	2	Ppp2r3a
Fuca1	3.33e-17	0.309413	0.569	0.526	1.89e-12	2	Fuca1
Hsd17b4	3.82e-17	0.262648	0.528	0.46	2.17e-12	2	Hsd17b4
Hibadh	5.39e-17	0.269444	0.461	0.388	3.06e-12	2	Hibadh
Plxnb1	8.39e-17	0.254922	0.308	0.22	4.76e-12	2	Plxnb1
Gnptg	1.07e-16	0.289621	0.503	0.446	6.08e-12	2	Gnptg
Pepd	1.43e-16	0.282618	0.468	0.409	8.12e-12	2	Pepd
Rab5a	1.53e-16	0.283215	0.375	0.295	8.7e-12	2	Rab5a
Tmem165	1.67e-16	0.289615	0.522	0.463	9.5e-12	2	Tmem165
ENSMUSG00000095041	1.96e-16	0.259583	0.196	0.119	1.11e-11	2	ENSMUSG00000095041
Slc35c2	3.09e-16	0.282561	0.38	0.298	1.75e-11	2	Slc35c2
Rac3	3.53e-16	0.257465	0.348	0.259	2e-11	2	Rac3
Sfxn1	3.92e-16	0.254086	0.745	0.724	2.23e-11	2	Sfxn1
Lysmd2	3.95e-16	0.294886	0.514	0.456	2.24e-11	2	Lysmd2
Pold4	4.1e-16	0.269962	0.295	0.211	2.33e-11	2	Pold4
Kif1b	5.36e-16	0.253238	0.697	0.675	3.04e-11	2	Kif1b
Sat1	7.19e-16	0.280216	0.33	0.248	4.08e-11	2	Sat1
Fkbp9	7.61e-16	0.251941	0.333	0.25	4.32e-11	2	Fkbp9
Gstk1	1.01e-15	0.257866	0.241	0.162	5.71e-11	2	Gstk1
Bmpr1a	1.21e-15	0.29703	0.431	0.361	6.87e-11	2	Bmpr1a
Cerk	1.22e-15	0.277879	0.271	0.195	6.95e-11	2	Cerk
Rdh5	1.51e-15	0.388962	0.45	0.391	8.56e-11	2	Rdh5
Tspan31	1.56e-15	0.285036	0.679	0.659	8.86e-11	2	Tspan31
Smim15	1.59e-15	0.270445	0.532	0.487	9.03e-11	2	Smim15
Nudt2	1.71e-15	0.273059	0.612	0.596	9.69e-11	2	Nudt2
Tjp2	3.46e-15	0.262296	0.305	0.225	1.97e-10	2	Tjp2
P3h4	3.91e-15	0.255562	0.312	0.23	2.22e-10	2	P3h4
Anapc16	6.42e-15	0.255099	0.654	0.631	3.64e-10	2	Anapc16
Fat1	6.83e-15	0.259214	0.383	0.308	3.88e-10	2	Fat1
Draxin	1.15e-14	0.328174	0.606	0.544	6.54e-10	2	Draxin
Appl2	1.25e-14	0.25721	0.288	0.21	7.12e-10	2	Appl2
Cyp20a1	1.41e-14	0.291167	0.418	0.354	8.02e-10	2	Cyp20a1
Rxylt1	1.69e-14	0.28027	0.431	0.37	9.57e-10	2	Rxylt1
Gnpda2	1.8e-14	0.25461	0.409	0.343	1.02e-09	2	Gnpda2
Ptdss2	2.26e-14	0.268623	0.429	0.364	1.28e-09	2	Ptdss2
Taf13	2.62e-14	0.277324	0.39	0.327	1.49e-09	2	Taf13
Sbds	4.24e-14	0.27416	0.49	0.439	2.41e-09	2	Sbds
Ddit4	4.28e-14	0.270459	0.32	0.242	2.43e-09	2	Ddit4
Dhrs7	5.01e-14	0.253137	0.363	0.295	2.84e-09	2	Dhrs7
Bbc3	5.5e-14	0.327315	0.291	0.214	3.12e-09	2	Bbc3
Rit1	7.73e-14	0.251367	0.355	0.282	4.38e-09	2	Rit1
Chpt1	8.22e-14	0.251398	0.315	0.243	4.66e-09	2	Chpt1
Evi5	8.37e-14	0.260175	0.512	0.459	4.75e-09	2	Evi5
Hadhb	1.08e-13	0.278263	0.497	0.459	6.14e-09	2	Hadhb
Fut9	1.27e-13	0.280171	0.371	0.304	7.19e-09	2	Fut9
Klf9	1.32e-13	0.300551	0.422	0.36	7.47e-09	2	Klf9
Fgfbp3	1.59e-13	0.342022	0.29	0.22	9.03e-09	2	Fgfbp3
Tmem63b	1.89e-13	0.257939	0.416	0.351	1.07e-08	2	Tmem63b
Agpat4	2.11e-13	0.255398	0.46	0.403	1.2e-08	2	Agpat4
Krcc1	3.61e-13	0.282829	0.416	0.354	2.05e-08	2	Krcc1
Cyp51	4.08e-13	0.296788	0.563	0.52	2.31e-08	2	Cyp51
Trp53inp1	5.12e-13	0.266076	0.284	0.21	2.9e-08	2	Trp53inp1
Pcp4	5.32e-13	0.262764	0.147	0.087	3.02e-08	2	Pcp4
Lrrn3	5.48e-13	0.302996	0.38	0.31	3.11e-08	2	Lrrn3
Mcl1	7.75e-13	0.250054	0.79	0.785	4.4e-08	2	Mcl1
Saysd1	9.7e-13	0.261313	0.366	0.304	5.5e-08	2	Saysd1
Tm2d3	1.26e-12	0.272075	0.553	0.525	7.16e-08	2	Tm2d3
Ext1	1.34e-12	0.27528	0.344	0.279	7.6e-08	2	Ext1
Golm1	3.07e-12	0.291652	0.445	0.398	1.74e-07	2	Golm1
1500009L16Rik	3.68e-12	0.259371	0.422	0.361	2.09e-07	2	1500009L16Rik
Mpg	4.71e-12	0.273472	0.422	0.372	2.67e-07	2	Mpg
Exoc4	5.45e-12	0.304126	0.438	0.394	3.09e-07	2	Exoc4
Thap3	8.89e-12	0.257933	0.367	0.31	5.04e-07	2	Thap3
Tmem9	2.19e-11	0.255411	0.497	0.46	1.24e-06	2	Tmem9
Bet1	2.96e-11	0.274821	0.419	0.382	1.68e-06	2	Bet1
Dennd10	3.59e-11	0.252685	0.288	0.229	2.04e-06	2	Dennd10
Lmna	4.09e-11	0.262265	0.276	0.209	2.32e-06	2	Lmna
Ccdc47	8e-11	0.252142	0.456	0.415	4.54e-06	2	Ccdc47
Tle4	3.14e-10	0.253753	0.475	0.427	1.78e-05	2	Tle4
Snhg15	4.14e-10	0.330959	0.364	0.315	2.35e-05	2	Snhg15
Phyh	1.69e-08	0.250422	0.438	0.41	0.000960925	2	Phyh
Taf7	2.12e-08	0.271721	0.555	0.555	0.00120224	2	Taf7
Hmgcr	5.52e-08	0.255367	0.554	0.547	0.0031304	2	Hmgcr
H2bc4	2.05e-07	0.316304	0.346	0.303	0.0116484	2	H2bc4
Septin4	4.62e-07	0.386308	0.447	0.41	0.0262212	2	Septin4
Cryab	2.01e-06	0.302679	0.155	0.113	0.114175	2	Cryab
Insig1	2.23e-06	0.277851	0.358	0.335	0.126762	2	Insig1
Mllt3	4.43e-06	0.25478	0.437	0.428	0.25127	2	Mllt3
Pcp4l11	0	1.68978	0.856	0.218	0	3	Pcp4l1
Hopx1	0	1.54701	0.986	0.438	0	3	Hopx
Timp41	0	1.43	0.973	0.397	0	3	Timp4
Fabp71	0	1.40025	1	0.951	0	3	Fabp7
Vim1	0	1.37671	1	0.985	0	3	Vim
Aldh1l11	0	1.2153	0.965	0.391	0	3	Aldh1l1
Gm295211	0	1.16235	0.836	0.266	0	3	Gm29521
Gdf101	0	1.13532	0.984	0.402	0	3	Gdf10
Gng121	0	1.13388	0.947	0.571	0	3	Gng12
Tnc1	0	1.11327	0.925	0.376	0	3	Tnc
A830029E22Rik1	0	1.11233	0.527	0.105	0	3	A830029E22Rik
Ckb1	0	1.09487	1	0.991	0	3	Ckb
Spock31	0	0.865362	0.7	0.192	0	3	Spock3
Ddah11	5.7e-297	1.11829	0.965	0.573	3.23e-292	3	Ddah1
Pea15a1	1.43e-294	1.07738	0.952	0.563	8.12e-290	3	Pea15a
Slc1a31	4.73e-287	1.19809	1	0.699	2.68e-282	3	Slc1a3
Gucy1a11	4.26e-285	0.951411	0.855	0.322	2.42e-280	3	Gucy1a1
Gstm11	3.21e-277	1.02269	0.894	0.416	1.82e-272	3	Gstm1
Ass11	7.37e-276	1.05432	0.555	0.137	4.18e-271	3	Ass1
Tst1	1.21e-273	1.03665	0.972	0.553	6.88e-269	3	Tst
1700086L19Rik1	3.49e-270	1.01389	0.814	0.336	1.98e-265	3	1700086L19Rik
Dbi1	1.81e-269	1.13032	1	0.969	1.03e-264	3	Dbi
Npy1	7.54e-267	1.03997	0.463	0.098	4.28e-262	3	Npy
1810037I17Rik1	5.89e-262	0.867761	0.987	0.872	3.34e-257	3	1810037I17Rik
Lsm6	3.81e-249	0.803039	0.989	0.912	2.16e-244	3	Lsm6
Rhoc1	1.73e-247	0.940011	0.883	0.436	9.8e-243	3	Rhoc
Lmcd11	2.62e-243	0.985494	0.697	0.262	1.49e-238	3	Lmcd1
Eif1b1	4.49e-243	0.839506	0.98	0.882	2.55e-238	3	Eif1b
Pla2g71	7.15e-240	0.750511	0.98	0.438	4.06e-235	3	Pla2g7
Igfbp71	3.08e-239	1.04255	0.607	0.186	1.75e-234	3	Igfbp7
Ndufc21	2.31e-238	0.696151	0.996	0.974	1.31e-233	3	Ndufc2
Abcb91	1.15e-237	0.905552	0.786	0.346	6.55e-233	3	Abcb9
Atp1b11	1.7e-227	0.684769	0.906	0.384	9.65e-223	3	Atp1b1
Rlbp11	1.83e-226	0.772427	0.666	0.221	1.04e-221	3	Rlbp1
Glul1	5.07e-225	0.96748	0.912	0.584	2.88e-220	3	Glul
Dclk11	8.48e-223	0.84908	0.842	0.421	4.81e-218	3	Dclk1
Cpne21	1.29e-222	0.700311	0.572	0.172	7.31e-218	3	Cpne2
Cyp26b11	1.65e-220	0.840429	0.867	0.389	9.38e-216	3	Cyp26b1
Msx21	1.19e-217	0.750765	0.692	0.239	6.78e-213	3	Msx2
Wif11	1.58e-214	0.681514	0.479	0.122	8.94e-210	3	Wif1
Fscn11	6.11e-214	0.874551	0.98	0.763	3.47e-209	3	Fscn1
Acot11	3.26e-213	0.906659	0.997	0.742	1.85e-208	3	Acot1
Rxrg1	1.37e-212	0.707006	0.603	0.19	7.8e-208	3	Rxrg
Mt31	1.07e-209	0.579382	0.955	0.469	6.1e-205	3	Mt3
Grm31	7.52e-208	0.660143	0.698	0.24	4.27e-203	3	Grm3
Gm93471	3.22e-207	0.84619	0.96	0.696	1.83e-202	3	Gm9347
Gnai21	5.8e-207	0.749391	0.99	0.856	3.29e-202	3	Gnai2
Sparc1	1.07e-206	0.812394	0.995	0.553	6.1e-202	3	Sparc
Pdlim31	4.84e-206	0.810404	0.847	0.395	2.75e-201	3	Pdlim3
Myh7	4.37e-203	0.460654	0.325	0.061	2.48e-198	3	Myh7
Cspg51	3.05e-202	0.610188	0.947	0.469	1.73e-197	3	Cspg5
Tmem256	3.6e-199	0.636529	0.985	0.934	2.05e-194	3	Tmem256
Echs1	2.04e-197	0.793342	0.947	0.755	1.16e-192	3	Echs1
Gria11	4.1e-194	0.571161	0.582	0.181	2.33e-189	3	Gria1
Arl6ip1	6.38e-190	1.07961	0.978	0.912	3.62e-185	3	Arl6ip1
Pcx1	1.49e-188	0.694609	0.697	0.279	8.48e-184	3	Pcx
Cd91	2.35e-184	0.652981	0.998	0.911	1.33e-179	3	Cd9
Sparcl11	1.31e-183	0.795758	1	0.721	7.44e-179	3	Sparcl1
Egfl61	1.62e-182	0.547655	0.387	0.093	9.19e-178	3	Egfl6
Tlcd11	1.85e-179	0.682908	0.676	0.271	1.05e-174	3	Tlcd1
Gm50891	1.03e-176	0.765083	0.947	0.708	5.86e-172	3	Gm5089
2810025M15Rik	1.85e-173	0.774448	0.89	0.635	1.05e-168	3	2810025M15Rik
Id31	8.44e-172	0.690586	0.849	0.383	4.79e-167	3	Id3
Ptprz11	1.64e-171	0.545076	0.97	0.503	9.29e-167	3	Ptprz1
Nes1	1.38e-170	0.882601	0.759	0.385	7.85e-166	3	Nes
Clrn11	1.74e-165	0.555732	0.45	0.132	9.89e-161	3	Clrn1
Selenof1	6.78e-165	0.493122	0.999	0.985	3.85e-160	3	Selenof
Cdh221	4.47e-158	0.486635	0.401	0.112	2.54e-153	3	Cdh22
Kitl1	6.01e-157	0.636346	0.68	0.296	3.41e-152	3	Kitl
Phgdh1	9.01e-157	0.703932	0.86	0.551	5.11e-152	3	Phgdh
Lxn1	1.28e-155	0.699296	0.96	0.656	7.25e-151	3	Lxn
0610040J01Rik1	6.94e-155	0.421788	0.287	0.06	3.94e-150	3	0610040J01Rik
Slc9a3r11	2.41e-154	0.678877	0.812	0.429	1.37e-149	3	Slc9a3r1
Gsta41	3.2e-154	0.720306	0.865	0.492	1.82e-149	3	Gsta4
Atp1a21	6.03e-151	0.399361	0.88	0.403	3.42e-146	3	Atp1a2
Cdh41	7.09e-146	0.551354	0.631	0.261	4.02e-141	3	Cdh4
Gstm71	8.45e-146	0.457046	0.387	0.111	4.8e-141	3	Gstm7
Tagln21	5.8e-140	0.645463	0.664	0.292	3.29e-135	3	Tagln2
Ndrg21	1.22e-135	0.567071	0.926	0.542	6.94e-131	3	Ndrg2
Gng5	2.52e-134	0.547743	0.972	0.876	1.43e-129	3	Gng5
Clip11	1.31e-133	0.577505	0.531	0.213	7.43e-129	3	Clip1
Pmp221	2.02e-133	0.559218	0.683	0.311	1.15e-128	3	Pmp22
Cyb5a1	4.22e-133	0.61418	0.92	0.744	2.4e-128	3	Cyb5a
Tpi1	4.68e-133	0.689881	0.923	0.748	2.66e-128	3	Tpi1
Hmgn3	6.88e-133	0.584268	0.957	0.855	3.9e-128	3	Hmgn3
Ednrb1	9.82e-133	0.424978	0.96	0.506	5.57e-128	3	Ednrb
Ldhb1	7.84e-132	0.590043	0.978	0.91	4.45e-127	3	Ldhb
Calcrl1	2.56e-130	0.46258	0.519	0.191	1.45e-125	3	Calcrl
Id41	1.25e-128	0.513298	0.792	0.373	7.07e-124	3	Id4
Tspan71	2.27e-128	0.539397	0.79	0.407	1.29e-123	3	Tspan7
E2f5	2.1e-127	0.675828	0.684	0.389	1.19e-122	3	E2f5
Efhd21	5.25e-126	0.571812	0.746	0.404	2.98e-121	3	Efhd2
Ctso1	1.72e-125	0.478387	0.507	0.194	9.77e-121	3	Ctso
Dbndd21	4.87e-124	0.431044	0.381	0.119	2.76e-119	3	Dbndd2
Pfn21	2.75e-122	0.568248	0.953	0.834	1.56e-117	3	Pfn2
Dad11	1.2e-121	0.475584	0.979	0.915	6.8e-117	3	Dad1
Aldh21	9.58e-121	0.606642	0.839	0.534	5.43e-116	3	Aldh2
Gas61	1.64e-120	0.439543	0.487	0.187	9.29e-116	3	Gas6
Tmem218	1.86e-118	0.642054	0.681	0.389	1.05e-113	3	Tmem218
Cdh111	2.44e-118	0.46128	0.501	0.192	1.38e-113	3	Cdh11
Gng111	2.02e-117	0.399628	0.482	0.183	1.15e-112	3	Gng11
Limch11	2.46e-117	0.544252	0.707	0.363	1.4e-112	3	Limch1
Oat1	6.41e-117	0.605946	0.839	0.595	3.64e-112	3	Oat
Pon21	7.6e-117	0.546013	0.757	0.418	4.31e-112	3	Pon2
Gcsh	8.12e-117	0.582124	0.892	0.704	4.61e-112	3	Gcsh
Pdcd5	9.92e-117	0.536627	0.972	0.905	5.63e-112	3	Pdcd5
Nkain41	4.12e-116	0.50932	0.907	0.566	2.34e-111	3	Nkain4
Pxdc1	2.6e-115	0.40415	0.306	0.086	1.48e-110	3	Pxdc1
Scrn11	6.18e-115	0.496542	0.56	0.253	3.51e-110	3	Scrn1
Fjx11	1.06e-114	0.54056	0.878	0.545	6.01e-110	3	Fjx1
Tspan61	9.57e-114	0.568809	0.935	0.798	5.43e-109	3	Tspan6
Septin41	6.35e-113	0.817468	0.686	0.384	3.6e-108	3	Septin4
Cnn31	7.02e-112	0.544427	0.95	0.813	3.98e-107	3	Cnn3
Pltp1	1.64e-111	0.449336	0.777	0.414	9.3e-107	3	Pltp
Qk1	2.51e-111	0.487902	0.992	0.877	1.42e-106	3	Qk
Fgf15	3.19e-110	0.310436	0.157	0.025	1.81e-105	3	Fgf15
Mt21	6.72e-110	0.438998	0.711	0.368	3.81e-105	3	Mt2
Ywhae	1.43e-109	0.337017	1	0.995	8.1e-105	3	Ywhae
Ttyh11	2.36e-109	0.281379	0.835	0.403	1.34e-104	3	Ttyh1
Ndfip11	9.08e-109	0.484272	0.986	0.942	5.15e-104	3	Ndfip1
Moxd1	3.46e-107	0.263224	0.196	0.04	1.97e-102	3	Moxd1
Paqr81	2.52e-105	0.459522	0.614	0.282	1.43e-100	3	Paqr8
Fgfr21	4.23e-105	0.384207	0.408	0.146	2.4e-100	3	Fgfr2
Slc30a101	9.02e-104	0.436682	0.466	0.184	5.12e-99	3	Slc30a10
Gstm51	1.77e-103	0.551258	0.94	0.795	1.01e-98	3	Gstm5
Lgalsl1	5.04e-102	0.55429	0.706	0.415	2.86e-97	3	Lgalsl
Ddt1	8.04e-102	0.526653	0.861	0.655	4.56e-97	3	Ddt
Hspe1	2.62e-101	0.419907	0.994	0.955	1.49e-96	3	Hspe1
Hsd17b101	4.41e-101	0.535932	0.921	0.737	2.5e-96	3	Hsd17b10
Etv51	1.08e-100	0.423362	0.487	0.204	6.12e-96	3	Etv5
Ccser21	2.21e-100	0.566494	0.71	0.435	1.25e-95	3	Ccser2
Hmgcs11	6.12e-100	0.629111	0.817	0.566	3.47e-95	3	Hmgcs1
Pdpn1	9.52e-100	0.447978	0.512	0.221	5.4e-95	3	Pdpn
Ackr31	7.13e-98	0.381046	0.378	0.134	4.05e-93	3	Ackr3
Gas2l3	6.63e-97	0.499209	0.51	0.24	3.76e-92	3	Gas2l3
AW0477301	1.06e-95	0.43537	0.786	0.435	6e-91	3	AW047730
Dab11	1.27e-95	0.436064	0.497	0.216	7.22e-91	3	Dab1
Col2a11	1.85e-95	0.36952	0.323	0.106	1.05e-90	3	Col2a1
Lrba1	6.68e-95	0.514027	0.519	0.245	3.79e-90	3	Lrba
Olfm2	7.79e-95	0.366005	0.402	0.149	4.42e-90	3	Olfm2
Tceal3	1.26e-94	0.541791	0.673	0.401	7.15e-90	3	Tceal3
ENSMUSG000001200081	2.42e-94	0.437086	0.645	0.316	1.37e-89	3	ENSMUSG00000120008
Ccdc34	6.9e-94	0.573661	0.896	0.742	3.92e-89	3	Ccdc34
Gpm6b1	7.95e-94	0.462335	0.933	0.717	4.51e-89	3	Gpm6b
Snx3	1.39e-93	0.432371	0.964	0.887	7.88e-89	3	Snx3
Fgfr11	1.4e-93	0.448676	0.629	0.324	7.95e-89	3	Fgfr1
Gria41	4.9e-93	0.449016	0.694	0.382	2.78e-88	3	Gria4
Scd21	1.92e-92	0.405446	0.935	0.736	1.09e-87	3	Scd2
Vta11	2.77e-92	0.522237	0.882	0.702	1.57e-87	3	Vta1
Psph1	2.99e-92	0.494668	0.73	0.452	1.69e-87	3	Psph
Btbd171	1.74e-91	0.469968	0.836	0.549	9.9e-87	3	Btbd17
Fth1	4.09e-91	0.256113	1	0.997	2.32e-86	3	Fth1
Mpst1	6.15e-91	0.533268	0.755	0.513	3.49e-86	3	Mpst
Selenow	1.07e-90	0.359699	0.997	0.991	6.06e-86	3	Selenow
Mgst11	2.46e-89	0.465898	0.84	0.527	1.4e-84	3	Mgst1
Efhd11	3.85e-89	0.329398	0.327	0.112	2.18e-84	3	Efhd1
Rhoa	5.9e-89	0.461454	0.953	0.872	3.35e-84	3	Rhoa
Tprgl1	1.69e-88	0.509433	0.86	0.652	9.59e-84	3	Tprgl
Uqcr10	2.23e-87	0.390317	0.991	0.946	1.27e-82	3	Uqcr10
Smpdl3a1	2.48e-87	0.402528	0.571	0.273	1.41e-82	3	Smpdl3a
Gask1b1	2.67e-87	0.250385	0.181	0.041	1.52e-82	3	Gask1b
Pfkl1	3.1e-87	0.468189	0.532	0.264	1.76e-82	3	Pfkl
Etv4	9.08e-87	0.355616	0.409	0.163	5.15e-82	3	Etv4
Mfap21	1.1e-86	0.404525	0.698	0.366	6.26e-82	3	Mfap2
Gnb41	3.75e-86	0.512786	0.725	0.467	2.13e-81	3	Gnb4
Ssbp41	6.77e-86	0.459691	0.78	0.525	3.84e-81	3	Ssbp4
Emid11	2.04e-85	0.346812	0.486	0.208	1.16e-80	3	Emid1
Swi5	2.05e-85	0.37131	0.981	0.934	1.16e-80	3	Swi5
Fzd11	1.21e-84	0.434468	0.56	0.276	6.88e-80	3	Fzd1
Tnfaip61	1.34e-84	0.328683	0.332	0.119	7.63e-80	3	Tnfaip6
Rab341	1.66e-84	0.514741	0.68	0.412	9.41e-80	3	Rab34
Mybpc11	2.02e-84	0.364319	0.289	0.094	1.14e-79	3	Mybpc1
Rfx41	3.09e-84	0.388238	0.755	0.408	1.75e-79	3	Rfx4
Cox8a	3.88e-84	0.318997	0.999	0.992	2.2e-79	3	Cox8a
Tmod21	1.63e-83	0.505272	0.674	0.426	9.24e-79	3	Tmod2
Serpinb1a	2.4e-82	0.278598	0.175	0.041	1.36e-77	3	Serpinb1a
Omg1	4.79e-82	0.319627	0.307	0.105	2.72e-77	3	Omg
Gde11	3.07e-81	0.48168	0.843	0.662	1.74e-76	3	Gde1
Adgrb11	4.75e-81	0.404539	0.589	0.311	2.7e-76	3	Adgrb1
Prex11	5.26e-81	0.433425	0.527	0.261	2.98e-76	3	Prex1
Hepacam1	7.28e-81	0.368409	0.558	0.261	4.13e-76	3	Hepacam
Galk1	1.34e-80	0.491412	0.756	0.492	7.61e-76	3	Galk1
Pls31	1.43e-79	0.471177	0.568	0.311	8.11e-75	3	Pls3
Rap1a	1.04e-78	0.482258	0.838	0.682	5.89e-74	3	Rap1a
Cthrc1	1.59e-78	0.392816	0.422	0.188	9e-74	3	Cthrc1
Fbxo21	1.76e-78	0.326003	0.494	0.226	1e-73	3	Fbxo2
Itga61	2.81e-78	0.356805	0.416	0.177	1.6e-73	3	Itga6
Pomp	3.54e-78	0.363413	0.987	0.942	2.01e-73	3	Pomp
Plat1	3.71e-78	0.32133	0.635	0.318	2.1e-73	3	Plat
AI5934421	1.49e-77	0.307987	0.302	0.106	8.47e-73	3	AI593442
Npl	1.56e-77	0.285779	0.389	0.159	8.83e-73	3	Npl
Ggct	2.12e-77	0.395665	0.441	0.209	1.2e-72	3	Ggct
Lix1l1	2.75e-77	0.392686	0.539	0.271	1.56e-72	3	Lix1l
Aldoa1	2.89e-77	0.518495	0.937	0.814	1.64e-72	3	Aldoa
Rnpep	6.99e-77	0.429328	0.483	0.244	3.97e-72	3	Rnpep
Abcd31	1.55e-76	0.440548	0.636	0.377	8.77e-72	3	Abcd3
Acsbg11	2.51e-76	0.316922	0.425	0.177	1.43e-71	3	Acsbg1
Magt11	3.37e-76	0.447668	0.613	0.351	1.91e-71	3	Magt1
Mettl9	3.96e-76	0.40604	0.96	0.892	2.25e-71	3	Mettl9
Ckap2	1.16e-75	0.876281	0.562	0.36	6.61e-71	3	Ckap2
Selenbp11	1.66e-75	0.359096	0.431	0.19	9.4e-71	3	Selenbp1
Nek61	1.14e-74	0.445097	0.529	0.284	6.44e-70	3	Nek6
Tubb6	1.21e-74	0.403633	0.337	0.137	6.87e-70	3	Tubb6
Pigt1	1.37e-74	0.448893	0.8	0.57	7.76e-70	3	Pigt
Ak11	1.46e-74	0.389842	0.388	0.165	8.31e-70	3	Ak1
Smdt1	1.8e-74	0.343134	0.987	0.955	1.02e-69	3	Smdt1
Cd441	4.86e-74	0.286623	0.315	0.117	2.76e-69	3	Cd44
Mocs21	6.21e-74	0.468434	0.832	0.661	3.52e-69	3	Mocs2
Tuba1c	1.49e-73	0.607276	0.5	0.265	8.45e-69	3	Tuba1c
Cdh61	2.17e-73	0.288094	0.277	0.096	1.23e-68	3	Cdh6
Dip2b1	3.36e-73	0.457091	0.717	0.473	1.91e-68	3	Dip2b
Cd3021	4.7e-73	0.388464	0.47	0.225	2.67e-68	3	Cd302
Msi21	1.58e-72	0.426423	0.75	0.506	8.97e-68	3	Msi2
Vldlr1	2.3e-72	0.331925	0.569	0.29	1.31e-67	3	Vldlr
Jakmip21	2.94e-72	0.429622	0.569	0.322	1.67e-67	3	Jakmip2
Fez11	3.12e-72	0.38211	0.969	0.833	1.77e-67	3	Fez1
Rasa31	5.98e-72	0.415611	0.551	0.302	3.39e-67	3	Rasa3
Acadl1	6.11e-72	0.415751	0.906	0.722	3.47e-67	3	Acadl
Spcs21	6.13e-72	0.357846	0.974	0.934	3.48e-67	3	Spcs2
Gpx81	3.73e-71	0.436943	0.804	0.558	2.12e-66	3	Gpx8
Mtarc21	4.37e-71	0.435131	0.791	0.569	2.48e-66	3	Mtarc2
Prelid21	1.93e-70	0.350672	0.371	0.162	1.09e-65	3	Prelid2
Traf41	2.89e-70	0.440465	0.781	0.575	1.64e-65	3	Traf4
Cd811	1.28e-69	0.282732	0.997	0.954	7.28e-65	3	Cd81
1500009L16Rik1	1.45e-69	0.460312	0.575	0.344	8.22e-65	3	1500009L16Rik
Cavin31	2.09e-69	0.44603	0.851	0.642	1.19e-64	3	Cavin3
Sptssa	2.55e-69	0.439791	0.89	0.737	1.45e-64	3	Sptssa
Pfn1	3.74e-69	0.305585	0.997	0.972	2.12e-64	3	Pfn1
Fam181a1	4.62e-69	0.302256	0.279	0.102	2.62e-64	3	Fam181a
Vdac1	7.69e-69	0.389481	0.977	0.921	4.36e-64	3	Vdac1
Nrcam1	9.41e-69	0.358525	0.71	0.442	5.34e-64	3	Nrcam
Notch31	2.83e-68	0.262893	0.31	0.117	1.6e-63	3	Notch3
Plod21	2.98e-68	0.386727	0.49	0.26	1.69e-63	3	Plod2
Fkbp101	5.51e-68	0.331968	0.371	0.158	3.12e-63	3	Fkbp10
Aamp	3.21e-67	0.400733	0.91	0.786	1.82e-62	3	Aamp
Camk2n11	1.17e-66	0.449178	0.694	0.421	6.61e-62	3	Camk2n1
Col23a11	2.38e-66	0.286857	0.648	0.344	1.35e-61	3	Col23a1
Ccnd11	3.78e-66	0.292817	0.929	0.613	2.15e-61	3	Ccnd1
Cfap1001	7.59e-66	0.285312	0.32	0.126	4.31e-61	3	Cfap100
Etfb1	1.23e-65	0.426164	0.796	0.611	6.96e-61	3	Etfb
Actr3b	4.21e-65	0.257701	0.246	0.086	2.39e-60	3	Actr3b
Hsp90b1	4.57e-65	0.397015	0.986	0.959	2.59e-60	3	Hsp90b1
Arl31	4.83e-65	0.414375	0.903	0.775	2.74e-60	3	Arl3
Smarcd31	5.39e-65	0.3824	0.5	0.266	3.06e-60	3	Smarcd3
Tmem37	7.46e-65	0.260926	0.237	0.081	4.23e-60	3	Tmem37
Ppp1r1a1	7.93e-65	0.389636	0.663	0.413	4.5e-60	3	Ppp1r1a
Cdkn3	8.71e-65	0.513957	0.414	0.216	4.94e-60	3	Cdkn3
Prss231	1e-64	0.264694	0.389	0.169	5.7e-60	3	Prss23
Plin31	1.91e-64	0.344947	0.399	0.185	1.08e-59	3	Plin3
H2az21	6.27e-64	0.314343	0.999	0.984	3.56e-59	3	H2az2
Ier31	7.14e-64	0.41016	0.566	0.327	4.05e-59	3	Ier3
Ostc	2.62e-63	0.367446	0.947	0.882	1.49e-58	3	Ostc
Mdk	3.11e-63	0.359845	0.996	0.926	1.76e-58	3	Mdk
Gm37641	3.46e-63	0.292699	0.966	0.761	1.96e-58	3	Gm3764
Sdc31	9.66e-63	0.317124	0.704	0.43	5.48e-58	3	Sdc3
Kcnmb4	1.89e-62	0.422212	0.551	0.323	1.07e-57	3	Kcnmb4
Prxl2a1	2.14e-62	0.353521	0.736	0.487	1.21e-57	3	Prxl2a
Prex21	3.87e-62	0.29749	0.386	0.178	2.2e-57	3	Prex2
Ei241	3.93e-62	0.509102	0.735	0.554	2.23e-57	3	Ei24
Aard	4.48e-62	0.392518	0.748	0.522	2.54e-57	3	Aard
Eci21	1.56e-61	0.379788	0.898	0.784	8.83e-57	3	Eci2
Taf131	1.71e-61	0.403118	0.531	0.312	9.73e-57	3	Taf13
Cpne81	9.62e-61	0.307102	0.331	0.139	5.46e-56	3	Cpne8
Commd61	1e-60	0.399096	0.792	0.612	5.69e-56	3	Commd6
Isoc1	1.85e-60	0.451032	0.808	0.627	1.05e-55	3	Isoc1
Dcxr1	2.35e-60	0.476864	0.361	0.17	1.33e-55	3	Dcxr
Cotl1	2.43e-60	0.349264	0.838	0.611	1.38e-55	3	Cotl1
Glud11	2.55e-59	0.306006	0.848	0.631	1.45e-54	3	Glud1
Nudt22	3.35e-59	0.421096	0.761	0.58	1.9e-54	3	Nudt2
Camk11	5.95e-59	0.326164	0.494	0.264	3.38e-54	3	Camk1
Rac31	1.1e-58	0.373083	0.469	0.246	6.26e-54	3	Rac3
Sar1b1	2.42e-58	0.351401	0.922	0.826	1.37e-53	3	Sar1b
Ndn	2.84e-58	0.355686	0.941	0.85	1.61e-53	3	Ndn
Dhrs41	3e-58	0.404691	0.667	0.451	1.71e-53	3	Dhrs4
Tmbim61	5.07e-58	0.319822	0.969	0.878	2.88e-53	3	Tmbim6
Hsd17b121	7.31e-58	0.369597	0.848	0.671	4.15e-53	3	Hsd17b12
Ccnb2	2.35e-57	0.717676	0.588	0.422	1.33e-52	3	Ccnb2
Adgrb21	2.56e-57	0.32495	0.499	0.266	1.46e-52	3	Adgrb2
Selenok1	3.26e-57	0.266908	0.995	0.977	1.85e-52	3	Selenok
Ebpl1	4.17e-57	0.42801	0.684	0.475	2.37e-52	3	Ebpl
Ctnnb1	4.23e-57	0.370964	0.914	0.798	2.4e-52	3	Ctnnb1
Cbs1	5.46e-57	0.263929	0.338	0.146	3.1e-52	3	Cbs
Shisa41	2.1e-56	0.341906	0.546	0.309	1.19e-51	3	Shisa4
Opcml1	1.14e-55	0.258965	0.359	0.16	6.48e-51	3	Opcml
Septin7	1.74e-55	0.329014	0.975	0.928	9.87e-51	3	Septin7
Klf31	1.75e-55	0.371247	0.596	0.357	9.94e-51	3	Klf3
Pals2	1.87e-55	0.425989	0.822	0.679	1.06e-50	3	Pals2
Med10	2.7e-55	0.399388	0.86	0.732	1.53e-50	3	Med10
Zcchc241	6.5e-55	0.292871	0.543	0.296	3.69e-50	3	Zcchc24
Cd1511	6.62e-55	0.342684	0.504	0.275	3.76e-50	3	Cd151
Rnf1821	9.64e-55	0.276767	0.415	0.2	5.47e-50	3	Rnf182
Jam21	1.43e-54	0.332246	0.647	0.397	8.14e-50	3	Jam2
Wwtr11	1.59e-54	0.307615	0.426	0.215	9.03e-50	3	Wwtr1
Sema6d1	4.48e-54	0.277472	0.531	0.287	2.54e-49	3	Sema6d
Asah11	5.31e-54	0.333117	0.658	0.429	3.02e-49	3	Asah1
Bbip1	6.01e-54	0.380528	0.846	0.714	3.41e-49	3	Bbip1
Mcc1	9e-54	0.26037	0.287	0.12	5.11e-49	3	Mcc
Pttg1	9.81e-54	0.688	0.671	0.519	5.57e-49	3	Pttg1
Dynlt31	1.13e-53	0.351262	0.497	0.286	6.43e-49	3	Dynlt3
Thrsp1	2.29e-53	0.449149	0.422	0.221	1.3e-48	3	Thrsp
Lamp11	2.39e-53	0.25419	0.974	0.903	1.36e-48	3	Lamp1
Notch11	2.66e-53	0.281891	0.637	0.375	1.51e-48	3	Notch1
Fmc1	3.89e-53	0.392561	0.853	0.71	2.21e-48	3	Fmc1
Unc1191	5.51e-53	0.42723	0.671	0.466	3.13e-48	3	Unc119
Ndufs8	5.53e-53	0.349396	0.935	0.854	3.14e-48	3	Ndufs8
Kit1	1.08e-52	0.279578	0.414	0.209	6.12e-48	3	Kit
Mest	1.17e-52	0.315929	0.432	0.232	6.67e-48	3	Mest
Gsto1	3.47e-52	0.47425	0.559	0.371	1.97e-47	3	Gsto1
Cnr1	6.12e-52	0.271002	0.256	0.105	3.48e-47	3	Cnr1
Tacc31	6.66e-52	0.524063	0.581	0.394	3.78e-47	3	Tacc3
Mrps14	8.09e-52	0.333274	0.946	0.864	4.59e-47	3	Mrps14
Spry11	8.36e-52	0.323883	0.481	0.262	4.74e-47	3	Spry1
Rab91	1.5e-51	0.367081	0.785	0.605	8.51e-47	3	Rab9
Ccn11	8.2e-51	0.342872	0.68	0.442	4.65e-46	3	Ccn1
Nadk2	1.8e-50	0.309275	0.423	0.229	1.02e-45	3	Nadk2
Cyrib	2.21e-50	0.391244	0.736	0.566	1.25e-45	3	Cyrib
Arl8a1	2.21e-50	0.378654	0.763	0.558	1.26e-45	3	Arl8a
Ncs1	2.4e-50	0.336811	0.417	0.226	1.36e-45	3	Ncs1
H2bc41	3.73e-50	0.450511	0.484	0.288	2.11e-45	3	H2bc4
Degs11	5.84e-50	0.34365	0.559	0.345	3.32e-45	3	Degs1
Tubb4b	1.04e-49	0.412589	0.948	0.903	5.91e-45	3	Tubb4b
Syt12	1.64e-49	0.291241	0.547	0.323	9.29e-45	3	Syt1
Plk21	6.35e-49	0.276645	0.485	0.266	3.61e-44	3	Plk2
Tsc22d41	7.14e-49	0.334383	0.571	0.355	4.05e-44	3	Tsc22d4
Klf151	1.33e-48	0.267634	0.35	0.165	7.56e-44	3	Klf15
Park7	2.68e-48	0.259018	0.991	0.965	1.52e-43	3	Park7
Dynll1	3.05e-48	0.48834	0.987	0.972	1.73e-43	3	Dynll1
Kank11	3.35e-48	0.265607	0.376	0.192	1.9e-43	3	Kank1
Plec1	4.54e-48	0.251013	0.377	0.186	2.58e-43	3	Plec
Zfp704	8.79e-48	0.398625	0.63	0.455	4.99e-43	3	Zfp704
Slc35c21	1.28e-47	0.354251	0.48	0.287	7.29e-43	3	Slc35c2
Pantr1	2.62e-47	0.337138	0.726	0.519	1.48e-42	3	Pantr1
Sbds1	3.33e-47	0.36322	0.619	0.425	1.89e-42	3	Sbds
Kbtbd111	4.14e-47	0.355185	0.579	0.375	2.35e-42	3	Kbtbd11
Cdc42	8.18e-47	0.261012	0.985	0.959	4.64e-42	3	Cdc42
Atxn10	1.37e-46	0.313164	0.967	0.919	7.76e-42	3	Atxn10
Nedd8	5.25e-46	0.250159	0.986	0.97	2.98e-41	3	Nedd8
Sec11c	5.57e-46	0.331059	0.7	0.512	3.16e-41	3	Sec11c
Ndufs6	8.15e-46	0.310601	0.973	0.912	4.63e-41	3	Ndufs6
Smim151	2.46e-45	0.336559	0.655	0.474	1.39e-40	3	Smim15
Bet11	3.95e-45	0.311689	0.562	0.366	2.24e-40	3	Bet1
Mcrip1	4.16e-45	0.331672	0.899	0.793	2.36e-40	3	Mcrip1
Col9a31	2.81e-44	0.297503	0.773	0.538	1.59e-39	3	Col9a3
Hsbp1	3.81e-44	0.25287	0.975	0.935	2.16e-39	3	Hsbp1
Knstrn	3.98e-44	0.251154	0.252	0.115	2.26e-39	3	Knstrn
Fkbp2	7.49e-44	0.355413	0.885	0.785	4.25e-39	3	Fkbp2
Spry21	1.09e-43	0.314324	0.618	0.391	6.16e-39	3	Spry2
Pgrmc11	2.14e-43	0.290833	0.848	0.692	1.22e-38	3	Pgrmc1
Suclg2	2.18e-43	0.347091	0.534	0.351	1.24e-38	3	Suclg2
Ssr31	2.5e-43	0.31474	0.86	0.74	1.42e-38	3	Ssr3
Rps27l	6.08e-43	0.436565	0.99	0.966	3.45e-38	3	Rps27l
Tacc11	2.02e-42	0.295225	0.484	0.287	1.15e-37	3	Tacc1
Dars1	2.38e-42	0.338672	0.711	0.533	1.35e-37	3	Dars
Cenpa	3.54e-42	0.536937	0.633	0.46	2.01e-37	3	Cenpa
Ctnnd21	4.66e-42	0.304635	0.532	0.332	2.64e-37	3	Ctnnd2
Gm35040	4.96e-42	0.252929	0.321	0.158	2.81e-37	3	Gm35040
Vps29	6.6e-42	0.31628	0.865	0.747	3.74e-37	3	Vps29
Thyn1	1.19e-41	0.411213	0.739	0.616	6.77e-37	3	Thyn1
Chmp4b	2.02e-41	0.339166	0.837	0.708	1.15e-36	3	Chmp4b
Enho1	2.55e-41	0.35911	0.76	0.58	1.45e-36	3	Enho
Acadm1	4.77e-41	0.29807	0.622	0.427	2.7e-36	3	Acadm
Cacng41	1.13e-40	0.301665	0.642	0.415	6.42e-36	3	Cacng4
Fgfbp31	1.21e-40	0.349834	0.374	0.211	6.84e-36	3	Fgfbp3
Sri	2.66e-40	0.331153	0.819	0.684	1.51e-35	3	Sri
Rest1	3.58e-40	0.274494	0.432	0.25	2.03e-35	3	Rest
Pdgfc	4.7e-40	0.272174	0.339	0.182	2.67e-35	3	Pdgfc
Kctd121	1.15e-39	0.254395	0.37	0.202	6.52e-35	3	Kctd12
Marcksl1	1.17e-39	0.282974	0.985	0.951	6.63e-35	3	Marcksl1
Dach11	1.3e-39	0.296745	0.496	0.311	7.37e-35	3	Dach1
1700096K18Rik	2.45e-39	0.254819	0.318	0.165	1.39e-34	3	1700096K18Rik
Mcrip2	4.14e-39	0.251177	0.293	0.146	2.35e-34	3	Mcrip2
Uqcc2	5.65e-39	0.30166	0.949	0.865	3.21e-34	3	Uqcc2
Naxe	6.24e-39	0.324434	0.799	0.652	3.54e-34	3	Naxe
Tom1l1	7.01e-39	0.297042	0.413	0.244	3.98e-34	3	Tom1l1
Anapc161	8.41e-39	0.321635	0.766	0.619	4.77e-34	3	Anapc16
Golm11	1.18e-38	0.320373	0.56	0.385	6.72e-34	3	Golm1
Canx1	1.19e-38	0.302406	0.91	0.83	6.75e-34	3	Canx
Lysmd21	1.9e-38	0.335268	0.616	0.445	1.08e-33	3	Lysmd2
Mrpl41	5.64e-38	0.304597	0.834	0.718	3.2e-33	3	Mrpl41
Pfdn1	7.61e-38	0.297056	0.921	0.839	4.32e-33	3	Pfdn1
Mlf2	9.43e-38	0.344491	0.892	0.804	5.35e-33	3	Mlf2
Selenos1	1.84e-37	0.275292	0.821	0.685	1.04e-32	3	Selenos
Ptgr1	4.37e-37	0.252181	0.307	0.162	2.48e-32	3	Ptgr1
Ccng11	1.09e-36	0.350882	0.32	0.175	6.17e-32	3	Ccng1
Mrps33	1.1e-36	0.319158	0.574	0.412	6.25e-32	3	Mrps33
Add3	1.19e-36	0.265239	0.487	0.304	6.75e-32	3	Add3
Zic41	2.09e-36	0.33263	0.652	0.474	1.19e-31	3	Zic4
Psmb2	2.33e-36	0.260052	0.977	0.936	1.32e-31	3	Psmb2
Esd	9.41e-36	0.279446	0.941	0.87	5.34e-31	3	Esd
Bax1	1.36e-35	0.35686	0.963	0.932	7.7e-31	3	Bax
Etfrf1	1.82e-35	0.256219	0.388	0.229	1.04e-30	3	Etfrf1
Mpc2	2.09e-35	0.25164	0.94	0.87	1.18e-30	3	Mpc2
Faim	4.54e-35	0.31133	0.649	0.49	2.57e-30	3	Faim
Acaa21	4.71e-35	0.26067	0.544	0.355	2.67e-30	3	Acaa2
Tmem2541	7.3e-35	0.28411	0.53	0.353	4.14e-30	3	Tmem254
Sypl1	7.33e-35	0.252276	0.486	0.308	4.16e-30	3	Sypl
Sf3b6	1.03e-34	0.253018	0.973	0.927	5.85e-30	3	Sf3b6
Mpg1	2.1e-34	0.335839	0.523	0.361	1.19e-29	3	Mpg
Ttyh31	2.4e-34	0.26402	0.692	0.524	1.36e-29	3	Ttyh3
Hadh	2.5e-34	0.299101	0.77	0.611	1.42e-29	3	Hadh
Spred11	2.5e-34	0.27103	0.572	0.396	1.42e-29	3	Spred1
Vgll41	3.55e-34	0.28392	0.627	0.455	2.01e-29	3	Vgll4
Pdcd101	3.71e-34	0.284487	0.777	0.651	2.1e-29	3	Pdcd10
Commd3	4.75e-34	0.339954	0.883	0.802	2.69e-29	3	Commd3
Acap2	4.75e-34	0.286341	0.506	0.339	2.69e-29	3	Acap2
Mrpl52	5.53e-34	0.258756	0.966	0.89	3.14e-29	3	Mrpl52
Tle41	5.68e-34	0.274278	0.593	0.414	3.22e-29	3	Tle4
Gldc	7.15e-34	0.256521	0.36	0.207	4.06e-29	3	Gldc
Ost4	1.36e-33	0.293107	0.827	0.713	7.72e-29	3	Ost4
Smim8	1.73e-33	0.293463	0.637	0.472	9.81e-29	3	Smim8
Ppp2r3a1	2.94e-33	0.260854	0.461	0.289	1.67e-28	3	Ppp2r3a
Pmvk	3.45e-33	0.287059	0.536	0.367	1.96e-28	3	Pmvk
Cebpzos	3.84e-33	0.285244	0.606	0.442	2.18e-28	3	Cebpzos
Ppp1r2	3.92e-33	0.333103	0.65	0.511	2.22e-28	3	Ppp1r2
Lpin21	9.75e-33	0.300622	0.581	0.411	5.53e-28	3	Lpin2
Mageh11	1.92e-32	0.258933	0.759	0.604	1.09e-27	3	Mageh1
Dtnbp1	2.95e-32	0.307269	0.646	0.5	1.67e-27	3	Dtnbp1
Lmo4	8.42e-32	0.305699	0.847	0.731	4.78e-27	3	Lmo4
Ptpra1	2.26e-31	0.26334	0.778	0.622	1.28e-26	3	Ptpra
Brk1	4.11e-31	0.288319	0.856	0.784	2.33e-26	3	Brk1
Ugp2	5.56e-31	0.273686	0.568	0.409	3.16e-26	3	Ugp2
Cyp511	1.03e-30	0.333811	0.657	0.51	5.87e-26	3	Cyp51
Cops6	1.07e-30	0.276645	0.866	0.774	6.07e-26	3	Cops6
Kctd17	1.14e-30	0.283008	0.619	0.47	6.48e-26	3	Kctd17
Ndufa13	1.9e-30	0.266254	0.935	0.881	1.08e-25	3	Ndufa13
Arhgap211	1.92e-30	0.273256	0.61	0.451	1.09e-25	3	Arhgap21
Laptm4b	2.37e-30	0.255909	0.455	0.296	1.35e-25	3	Laptm4b
Rdm1	3.71e-30	0.286006	0.485	0.338	2.11e-25	3	Rdm1
Erg28	4.1e-30	0.262148	0.842	0.729	2.32e-25	3	Erg28
Cops9	5.08e-30	0.272461	0.911	0.826	2.88e-25	3	Cops9
Mff	5.89e-30	0.265682	0.859	0.775	3.34e-25	3	Mff
Cwc15	6.15e-30	0.265215	0.904	0.815	3.49e-25	3	Cwc15
Dctn6	6.17e-30	0.286138	0.684	0.547	3.5e-25	3	Dctn6
Ten1	9.2e-30	0.278185	0.643	0.491	5.22e-25	3	Ten1
Rab14	1.18e-29	0.25199	0.938	0.878	6.72e-25	3	Rab14
Flot11	1.19e-29	0.260816	0.577	0.412	6.76e-25	3	Flot1
Cacybp	1.38e-29	0.254893	0.966	0.918	7.86e-25	3	Cacybp
[truncated: 17,755 more rows]
