# Supplementary material for: An increase in reactive oxygen species underlies neonatal cerebellum repair
Source: eLife. 2025 Aug 12;14:RP102515. doi: 10.7554/eLife.102515 (PMC12342822; doi:10.7554/eLife.102515)
Supplement: Figure 1—source data 4. [file elife-102515-fig1-data4.xls]

## Sheet: DESeq2_Named_AllResults_foldpv_
Figure 1–source data 4. Differentially open peaks at P2 identified by bulk ATAC-seq from nonIR and IR NEPs.
region	baseMean	log2FoldChange	lfcSE	stat	pvalue	padj	gene	distance
chr15_62079195_62079696	152.253	1.24926	0.195923	6.37625	1.81472e-10	3.93332e-06	Myc	-93805
chr17_29078846_29079347	45.0551	2.20428	0.342735	6.43144	1.26397e-10	3.93332e-06	Cdkn1a	11632
chr7_49209484_49209985	85.7598	1.72073	0.275334	6.24961	4.11472e-10	5.94563e-06	Nav2	-250388
chr10_84357894_84358395	120.826	-1.46842	0.254794	-5.76317	8.2548e-09	8.77454e-05	Nuak1	82203
chr11_78215595_78216096	185.07	1.08037	0.189641	5.69694	1.21973e-08	8.77454e-05	Supt6	29892
chr2_164494021_164494522	194.65	1.19482	0.211262	5.65562	1.55281e-08	8.77454e-05	Pigt	2998
chr3_87970825_87971326	672.029	0.735784	0.130264	5.64842	1.61933e-08	8.77454e-05	Nes	0
chr7_16309248_16309749	89.905	1.29969	0.230063	5.64928	1.61119e-08	8.77454e-05	Bbc3	0
chr10_45311572_45312073	92.6869	-1.72032	0.308954	-5.56821	2.57367e-08	0.000111566	Popdc3	-22268
chr9_28307581_28308082	129.739	1.29926	0.233012	5.57593	2.46212e-08	0.000111566	Opcml	-516635
chr15_84942744_84943245	149.759	1.1722	0.212699	5.51109	3.56621e-08	0.000140538	Nup50	-19334
chr3_105714186_105714687	109.063	-1.53193	0.280713	-5.45727	4.8352e-08	0.000174667	Fam212b	-9588
chr7_96474514_96475015	104.32	-1.62253	0.304031	-5.33673	9.46404e-08	0.000315582	Tenm4	-303269
chr10_128290585_128291086	94.2862	-2.43063	0.464317	-5.23484	1.65131e-07	0.000473898	Stat2	-20010
chr10_130281966_130282467	58.0404	-1.94357	0.372033	-5.22419	1.74914e-07	0.000473898	Neurod4	-1726
chr4_95125297_95125798	78.414	1.61266	0.307316	5.24757	1.54116e-07	0.000473898	Jun	-73075
chr9_101862776_101863277	126.599	1.12193	0.216037	5.19324	2.06668e-07	0.000526992	RP24-364K10.1	75204
chr17_29093486_29093987	56.5696	1.51647	0.29427	5.15332	2.55918e-07	0.000583884	Cdkn1a	-2508
chr4_65888313_65888814	109.851	-1.47061	0.285207	-5.15629	2.51888e-07	0.000583884	Astn2	515670
chr16_85887622_85888123	46.1621	-1.95782	0.382846	-5.11387	3.15626e-07	0.000621913	Adamts5	13003
chr6_127181294_127181795	141.771	-1.11217	0.216801	-5.1299	2.89897e-07	0.000621913	Ccnd2	-30234
chr7_135932686_135933187	48.6169	-1.77072	0.345874	-5.11955	3.06272e-07	0.000621913	Mki67	-216325
chr18_35019030_35019531	113.753	-1.40275	0.275431	-5.09294	3.52556e-07	0.000664476	Hspa9	-64673
chr5_23164818_23165319	59.1152	1.63943	0.32407	5.05888	4.21721e-07	0.000761716	Lhfpl3	-418760
chr15_68194361_68194862	107.828	-1.27626	0.253215	-5.04021	4.65025e-07	0.000806334	Zfat	63995
chr3_88494728_88495229	106.481	1.21483	0.242929	5.00077	5.7101e-07	0.000952028	Lmna	8107
chr2_146250452_146250953	58.6654	-1.68885	0.33886	-4.98391	6.23124e-07	0.00100044	Ralgapa2	261392
chr17_15440430_15440931	94.7712	-1.42883	0.287606	-4.96802	6.76407e-07	0.0010472	Fam120b	-44185
chr5_128513297_128513798	169.462	1.13624	0.230942	4.92003	8.65313e-07	0.00129346	Tmem132d	-80220
chr12_105526775_105527276	130.378	1.05084	0.214532	4.89829	9.66758e-07	0.00134817	Bdkrb2	35950
chr4_62582718_62583219	173.561	-1.0138	0.207661	-4.88201	1.05012e-06	0.00134817	Rgs3	-22872
chr5_35673000_35673501	76.5398	1.2812	0.261247	4.90418	9.38199e-07	0.00134817	Htra3	6282
chr5_73563932_73564433	51.0061	1.85526	0.380125	4.88064	1.05741e-06	0.00134817	Lrrc66	68094
chr6_113385926_113386427	42.1726	1.92033	0.393011	4.8862	1.02801e-06	0.00134817	Arpc4	-7812
chr2_5637015_5637516	170.301	0.96909	0.198854	4.87338	1.09707e-06	0.00135877	Camk1d	77000
chr2_84774716_84775217	137.915	-1.15764	0.23845	-4.85487	1.20467e-06	0.00141139	Serping1	228
chr9_96326586_96327087	79.6928	-1.47084	0.302666	-4.85961	1.17619e-06	0.00141139	Atp1b3	37356
chr14_102902854_102903355	97.511	-1.2851	0.265969	-4.83176	1.3533e-06	0.00141555	Kctd12	79283
chr18_78129161_78129662	231.853	0.914301	0.189162	4.83343	1.34198e-06	0.00141555	Slc14a1	12458
chr4_136143490_136143991	140.478	1.02615	0.212017	4.83992	1.29889e-06	0.00141555	Id3	0
chr6_122758643_122759144	85.7122	1.38408	0.286611	4.8291	1.3715e-06	0.00141555	Slc2a3	-15898
chr6_126340134_126340635	55.583	-1.59712	0.330515	-4.83223	1.35014e-06	0.00141555	Ntf3	-173224
chr1_181016490_181016991	81.6873	1.21677	0.252291	4.82289	1.41493e-06	0.00142642	Ephx1	579
chr2_77897165_77897666	93.33	-3.66241	0.763189	-4.79882	1.59602e-06	0.00157241	Cwc22	48710
chr3_107176507_107177008	80.9911	-1.33394	0.278772	-4.78508	1.70923e-06	0.00164652	Kcna10	6048
chr1_135681057_135681558	147.655	-1.17395	0.245795	-4.77614	1.78695e-06	0.00168397	Csrp1	38503
chr11_120039435_120039936	87.2338	1.19389	0.251157	4.75357	1.9986e-06	0.00184046	Aatk	7210
chr6_127993101_127993602	90.1032	-1.5541	0.327205	-4.74963	2.03792e-06	0.00184046	Tspan9	149962
chr1_172320012_172320513	91.5407	-1.35391	0.286337	-4.72838	2.26317e-06	0.00200216	Kcnj9	8806
chr10_79631329_79631830	86.7968	-1.44456	0.306146	-4.71852	2.37566e-06	0.00201927	Shc2	6089
chr16_93515322_93515823	53.4223	-1.77736	0.376654	-4.7188	2.37243e-06	0.00201927	Setd4	87981
chr1_135158634_135159135	244.164	0.828364	0.175762	4.71299	2.44104e-06	0.00202213	Gpr37l1	8547
chr7_145111454_145111955	117.315	1.11515	0.236743	4.7104	2.47233e-06	0.00202213	RP23-396L12.1	96126
chr1_152815172_152815673	195.763	-0.96008	0.204123	-4.70343	2.55823e-06	0.00205364	Ncf2	-14979
chr9_55083106_55083607	81.2599	-1.4448	0.307426	-4.69967	2.60587e-06	0.00205385	Chrnb4	-34327
chr17_10394781_10395282	201.433	0.833768	0.178255	4.67739	2.90551e-06	0.00216242	Qk	-75420
chr5_35671381_35671882	181.118	0.885283	0.189375	4.67475	2.94316e-06	0.00216242	Htra3	7901
chr7_100653845_100654346	184.714	0.921279	0.197006	4.67641	2.91945e-06	0.00216242	Plekhb1	8069
chr8_70469312_70469813	155.469	1.03122	0.220169	4.68377	2.81647e-06	0.00216242	Klhl26	7156
chr1_155229839_155230340	95.1722	-1.21615	0.261676	-4.64754	3.35911e-06	0.00220628	RP23-320I7.1	14105
chr10_92006340_92006841	63.4668	1.4162	0.30454	4.65031	3.31443e-06	0.00220628	Nedd1	715580
chr12_83781171_83781672	74.9098	-1.56161	0.335133	-4.65968	3.16702e-06	0.00220628	Papln	-17538
chr2_132989763_132990264	111.562	-1.25594	0.270226	-4.64772	3.35619e-06	0.00220628	Fermt1	-43857
chr6_113384448_113384949	133.1	1.70057	0.365269	4.65568	3.22915e-06	0.00220628	Arpc4	-6334
chr8_120309205_120309706	155.629	-1.09577	0.235436	-4.65424	3.25181e-06	0.00220628	AC114005.5	-398365
chr8_125660330_125660831	66.0531	-1.43098	0.307331	-4.65614	3.22191e-06	0.00220628	Map10	8987
chr6_127700986_127701487	136.685	-1.10722	0.238608	-4.64034	3.47832e-06	0.00222139	Prmt8	67986
chr7_131133042_131133543	32.9852	1.83421	0.395564	4.63695	3.53585e-06	0.00222139	Fgfr2	1989808
chr8_72655036_72655537	158.601	0.961469	0.207247	4.63923	3.49705e-06	0.00222139	Nwd1	-8266
chr11_60203097_60203598	38.6663	-1.9469	0.421126	-4.62309	3.78068e-06	0.00234126	Srebf1	17007
chr15_17803032_17803533	34.8392	-2.17539	0.471331	-4.61542	3.92295e-06	0.00239515	Cdh10	1015414
chr4_71765026_71765527	283.147	-0.905428	0.196585	-4.60578	4.10918e-06	0.00247401	RP24-168J7.2	-7061
chr10_121419947_121420448	73.7497	-1.43987	0.313394	-4.59443	4.33925e-06	0.00257674	Rassf3	55900
chr15_85735199_85735700	190.047	0.812289	0.177325	4.58079	4.63227e-06	0.00271357	Ppara	0
chr4_82584473_82584974	58.56	-1.55617	0.340476	-4.57058	4.86377e-06	0.00281119	Nfib	-78703
chr5_114263956_114264457	130.653	-1.0484	0.229925	-4.55976	5.12114e-06	0.00284611	Foxn4	9351
chr7_109993289_109993790	130.584	1.01735	0.222872	4.56473	5.00149e-06	0.00284611	Tmem41b	-6360
chr7_126008633_126009134	150.179	-1.11347	0.244087	-4.56179	5.07194e-06	0.00284611	Gsg1l	73278
chr10_70648754_70649255	50.2751	1.40902	0.309405	4.55397	5.26422e-06	0.00288859	Phyhipl	-49463
chr16_29786400_29786901	124.314	1.0366	0.227884	4.54878	5.3957e-06	0.00292373	Gm1968	175407
chr12_69417836_69418337	52.7545	-1.6187	0.356917	-4.53522	5.75437e-06	0.00297643	Gm9887	-45378
chr12_112436944_112437445	42.4839	-1.72189	0.379814	-4.53351	5.80111e-06	0.00297643	RP23-383E9.1	52003
chr16_44503054_44503555	141.051	-1.17199	0.258643	-4.53129	5.86233e-06	0.00297643	Boc	55343
chr17_8177024_8177525	103.169	1.10898	0.244368	4.53818	5.67427e-06	0.00297643	Fgfr1op	-11524
chr6_100892454_100892955	141.672	-0.96963	0.214057	-4.52977	5.90493e-06	0.00297643	Ppp4r2	-58833
chr9_50150021_50150522	53.0654	1.51702	0.3346	4.53384	5.79214e-06	0.00297643	RP23-68E4.3	194447
chr1_135676927_135677428	32.1202	-2.18292	0.484703	-4.50361	6.68083e-06	0.00325402	Csrp1	42633
chr2_26535515_26536016	111.334	1.00784	0.223618	4.50696	6.5762e-06	0.00325402	Notch1	-31693
chr5_21803463_21803964	42.9847	1.6134	0.358246	4.50362	6.68062e-06	0.00325402	Psmc2	-18181
chr12_102511273_102511774	85.6014	-1.28913	0.28688	-4.49364	7.00174e-06	0.00329911	Golga5	-42139
chr14_25478697_25479198	179.651	-0.874327	0.194553	-4.49403	6.9889e-06	0.00329911	Zmiz1	-19474
chr9_28261283_28261784	76.2026	1.36843	0.304337	4.49642	6.91071e-06	0.00329911	Opcml	-470337
chr2_165215375_165215876	147.613	0.957652	0.21358	4.48381	7.33222e-06	0.00341768	Cdh22	18978
chr12_52674948_52675449	78.5509	-1.37572	0.307476	-4.47424	7.66822e-06	0.00353627	Akap6	23934
chr2_77946110_77946611	222.103	-3.99959	0.894422	-4.4717	7.75989e-06	0.00354088	Cwc22	0
chr10_40499701_40500202	121.157	1.01789	0.227984	4.46476	8.01586e-06	0.00358226	Slc22a16	70134
chr9_120976114_120976615	83.5089	1.15804	0.259327	4.46555	7.9863e-06	0.00358226	Ulk4	300583
chr5_114175595_114176096	90.8544	1.13752	0.255022	4.46047	8.17806e-06	0.00361746	Acacb	-29061
chr12_111691443_111691944	161.729	0.920988	0.20669	4.45588	8.35498e-06	0.00365838	Trmt61a	-13339
chr9_47985588_47986089	131.631	1.01788	0.228683	4.45103	8.54583e-06	0.00370453	Nxpe4	175934
chr13_46812743_46813244	79.4123	1.22707	0.276185	4.4429	8.87528e-06	0.00380039	Kif13a	116475
chr13_63260660_63261161	160.686	0.905402	0.20386	4.44129	8.9423e-06	0.00380039	AC130827.2	-245727
chr16_63091360_63091861	60.7444	-1.51399	0.341264	-4.43642	9.14662e-06	0.00384948	Pros1	-237054
chr16_77236898_77237399	214.898	0.789547	0.178528	4.42253	9.7552e-06	0.00402741	Usp25	-222830
chr9_68486560_68487061	73.7785	-1.35158	0.305509	-4.42402	9.688e-06	0.00402741	Rora	166725
chr12_54696590_54697091	59.1651	1.48339	0.335616	4.41991	9.87432e-06	0.00403813	Eapp	-693
chr13_104038324_104038825	87.3076	-1.18474	0.268289	-4.41589	1.00595e-05	0.00407542	Nln	70790
chr10_42274418_42274919	41.072	1.40485	0.318855	4.40592	1.05334e-05	0.00412092	Foxo3	1837
chr17_50236309_50236810	90.6856	-1.15455	0.261981	-4.40701	1.04806e-05	0.00412092	Dazl	56790
chr3_5754711_5755212	130.988	-1.09777	0.24918	-4.40554	1.05521e-05	0.00412092	RP23-478I18.1	-3906
chrX_166803125_166803626	94.5745	-1.22147	0.277121	-4.4077	1.04475e-05	0.00412092	Egfl6	-217405
chr10_80302513_80303014	134.596	0.966506	0.220298	4.38727	1.14783e-05	0.0044033	Apc2	-6537
chr9_106144040_106144541	42.8169	-1.86471	0.425022	-4.38732	1.14755e-05	0.0044033	Glyctk	13598
chr19_55185546_55186047	68.0517	1.21554	0.277354	4.38263	1.17258e-05	0.00445878	Tectb	-4811
chr15_8632256_8632757	100.314	1.03621	0.236761	4.37659	1.20553e-05	0.00448431	Slc1a3	77653
chr4_149875952_149876453	82.3829	-1.22036	0.278895	-4.37572	1.21033e-05	0.00448431	Spsb1	78591
chr5_35924982_35925483	64.8977	-1.37081	0.313243	-4.37618	1.20779e-05	0.00448431	Afap1	-31664
chr10_42118808_42119309	46.963	-1.56809	0.359073	-4.36705	1.25934e-05	0.00452064	Armc2	-100372
chr12_53981428_53981929	188.179	0.991067	0.226964	4.36662	1.26185e-05	0.00452064	Npas3	-732752
chr12_85436116_85436617	110.06	-1.04675	0.239578	-4.36914	1.24739e-05	0.00452064	Fos	37273
chr4_128002559_128003060	77.8268	1.17691	0.269522	4.36665	1.26166e-05	0.00452064	Csmd2	-14516
chr11_28692749_28693250	39.8684	-1.71995	0.3953	-4.35099	1.35522e-05	0.00455923	Ccdc85a	-108425
chr11_84627233_84627734	60.0726	-1.51287	0.347356	-4.3554	1.32823e-05	0.00455923	Lhx1	-101698
chr12_108808365_108808866	33.3598	1.64945	0.378579	4.35695	1.31886e-05	0.00455923	Yy1	-15393
chr14_101561167_101561668	125.16	-1.04406	0.239463	-4.35999	1.30069e-05	0.00455923	Tbc1d4	47366
chr15_88570561_88571062	43.3607	-1.64294	0.377185	-4.3558	1.32584e-05	0.00455923	Zdhhc25	29240
chr4_140624604_140625105	310.943	0.737557	0.169524	4.35076	1.35664e-05	0.00455923	Arhgef10l	-40261
chr6_91146555_91147056	63.1429	-1.4929	0.343382	-4.34765	1.37606e-05	0.00455923	Hdac11	9609
chr7_27614033_27614534	151.187	0.870009	0.2002	4.3457	1.38831e-05	0.00455923	Akt2	-22482
chr7_101349800_101350301	117.812	1.05817	0.243474	4.34614	1.38557e-05	0.00455923	Arap1	-1734
chr8_84191902_84192403	139.711	0.943205	0.216997	4.34663	1.38245e-05	0.00455923	Nanos3	-15350
chr9_46592792_46593293	74.5705	-1.34327	0.308201	-4.35842	1.31004e-05	0.00455923	RP23-433B2.4	-272806
chr15_38602174_38602675	42.8846	1.56602	0.360887	4.33937	1.42891e-05	0.00465729	Atp6v1c1	59258
chr1_86032196_86032697	177.762	0.877464	0.202576	4.33153	1.48079e-05	0.0047634	AC102506.1	13166
chr2_51752873_51753374	88.892	-1.21533	0.280604	-4.33113	1.48345e-05	0.0047634	Tas2r134	-125363
chr2_146290835_146291336	176.76	-0.90438	0.209148	-4.32411	1.53148e-05	0.00485203	Ralgapa2	221009
chr2_174917532_174918033	68.3614	-1.36781	0.316342	-4.32383	1.53343e-05	0.00485203	RP23-330D3.1	92208
chr2_9530622_9531123	56.9087	1.29658	0.300083	4.32074	1.55508e-05	0.00488487	Gata3	347478
chr15_73535611_73536112	63.4299	1.27165	0.294536	4.31747	1.5783e-05	0.00492214	Dennd3	-23052
chr12_87043097_87043598	57.2448	-1.49118	0.346242	-4.30674	1.65679e-05	0.00513	Tmem63c	-16806
chr1_66655060_66655561	103.973	1.09685	0.254795	4.30483	1.67111e-05	0.0051321	Unc80	-186694
chr18_13707090_13707591	101.421	-1.21584	0.28259	-4.3025	1.68884e-05	0.0051321	Zfp521	265143
chr9_96660430_96660931	78.2792	1.11429	0.259018	4.30195	1.69298e-05	0.0051321	Rasa2	-28813
chr1_34182807_34183308	52.9356	-1.5048	0.349941	-4.30016	1.70678e-05	0.00513799	Dst	-274583
chr16_37442895_37443396	51.3921	-1.42411	0.331363	-4.29773	1.72554e-05	0.00515864	Stxbp5l	-57933
chr7_114290076_114290577	60.8586	-1.48433	0.345575	-4.29525	1.74498e-05	0.00518104	Psma1	-13958
chr12_79970256_79970757	250.567	0.771273	0.179876	4.28781	1.80446e-05	0.0053212	Zfp36l1	142257
chr1_73055097_73055598	47.3406	-1.52529	0.355969	-4.28489	1.82833e-05	0.00535517	Tnp1	-39188
chr4_45824359_45824860	57.6945	-1.39185	0.325046	-4.282	1.85222e-05	0.00537383	Igfbpl1	2064
chr6_73644790_73645291	58.9096	-1.51761	0.354488	-4.28113	1.8595e-05	0.00537383	RP23-338O19.3	-175123
chr13_99358871_99359372	127.66	-0.934878	0.218706	-4.27459	1.91493e-05	0.00549737	Mrps27	-14086
chr1_154102769_154103270	209.001	0.902602	0.211722	4.26314	2.01574e-05	0.00571114	Zfp648	97917
chr2_157434513_157435014	88.788	1.04031	0.243969	4.2641	2.0071e-05	0.00571114	Src	-16070
chr1_92137043_92137544	97.93	0.980328	0.230165	4.25924	2.05119e-05	0.00577382	Hdac4	42798
chr2_26475368_26475869	183.212	0.818037	0.192203	4.2561	2.0802e-05	0.00578043	Notch1	27954
chr9_41754404_41754905	44.4261	-1.60799	0.37773	-4.25698	2.07211e-05	0.00578043	CT025619.2	-173664
chr4_75838681_75839182	36.6802	-1.95182	0.458749	-4.25465	2.09374e-05	0.00578099	Tmem261	-560376
chr1_193784865_193785366	49.8078	-1.6516	0.389021	-4.24552	2.18083e-05	0.00598333	Camk1g	-414567
chr16_18415967_18416468	63.8056	1.18687	0.280112	4.23714	2.26381e-05	0.00617195	Comt	10385
chr15_80874716_80875217	51.2075	1.415	0.334425	4.23116	2.3249e-05	0.00629887	Tnrc6b	-163404
chr17_34025683_34026184	119.581	1.04542	0.247556	4.22297	2.41102e-05	0.0064788	H2-Ke6	1873
chr5_142440335_142440836	255.782	0.781818	0.185237	4.22064	2.43614e-05	0.0064788	Foxk1	-38839
chr6_128010457_128010958	49.5548	-1.53304	0.363167	-4.22132	2.4288e-05	0.0064788	Tspan9	132606
chr13_37088936_37089437	36.6314	-1.88726	0.447764	-4.21485	2.49948e-05	0.00649126	F13a1	-38692
chr13_53443725_53444226	180.043	0.896762	0.212719	4.21572	2.48987e-05	0.00649126	Msx2	28849
chr14_60398788_60399289	154.451	0.919945	0.218076	4.21846	2.45974e-05	0.00649126	Amer2	-25530
chr14_73388479_73388980	92.7087	1.09055	0.258747	4.21473	2.50073e-05	0.00649126	Itm2b	-3190
chr2_77993978_77994479	43.0499	-4.84516	1.15064	-4.21082	2.5444e-05	0.00650992	Cwc22	-47603
chr3_41583538_41584039	86.7118	-1.23263	0.292807	-4.20969	2.55723e-05	0.00650992	Jade1	-27808
chr5_146867647_146868148	101.815	1.09774	0.260791	4.20929	2.56169e-05	0.00650992	Rasl11a	-22577
chr6_32702290_32702791	71.7808	-1.29851	0.308528	-4.20874	2.56799e-05	0.00650992	Plxna4	-114098
chr17_27118574_27119075	66.2518	1.19025	0.283007	4.20571	2.60264e-05	0.0065594	Itpr3	-61271
chr11_98867080_98867581	198.927	0.867235	0.206436	4.20099	2.65745e-05	0.00658274	Wipf2	-3443
chr17_87360979_87361480	42.6252	-1.65977	0.39493	-4.20269	2.63757e-05	0.00658274	Ttc7	-78094
chr19_42471533_42472034	49.8464	-1.4679	0.349351	-4.2018	2.64802e-05	0.00658274	Crtac1	-39750
chr12_112590762_112591263	58.7377	-1.30982	0.31213	-4.1964	2.7119e-05	0.00659937	Inf2	-1979
chr2_25126070_25126571	199.766	0.778677	0.185495	4.19782	2.69492e-05	0.00659937	Noxa1	-30921
chr4_65839352_65839853	157.012	1.01143	0.241085	4.1953	2.72506e-05	0.00659937	Astn2	564631
chr8_10130731_10131232	73.1973	1.20641	0.287388	4.19783	2.69481e-05	0.00659937	Myo16	22679
chr16_93574824_93575325	33.2718	1.66918	0.398233	4.19146	2.77167e-05	0.00667496	Setd4	28479
chr4_100375236_100375737	35.7727	-1.80282	0.430453	-4.18819	2.81183e-05	0.00673426	Ror1	-279446
chr11_80983478_80983979	80.949	1.19747	0.286004	4.18692	2.82769e-05	0.00673503	Asic2	984479
chr13_43716366_43716867	91.1739	1.14366	0.273685	4.17875	2.93119e-05	0.00694339	Cd83	67908
chr10_27127335_27127836	40.9985	-1.73374	0.41554	-4.17226	3.01599e-05	0.00695425	Lama2	489008
chr15_87200230_87200731	74.5712	-1.22901	0.294426	-4.17426	2.98953e-05	0.00695425	Fam19a5	343568
chr4_123000667_123001168	46.8435	-1.57408	0.37714	-4.17374	2.99637e-05	0.00695425	Mycl	-4724
chr5_139610863_139611364	103.424	-1.05922	0.25366	-4.17574	2.97022e-05	0.00695425	Uncx	-67370
chr7_102369650_102370151	48.7688	-1.65347	0.396213	-4.17318	3.00373e-05	0.00695425	Stim1	-101845
chr15_12211605_12212106	92.2155	-1.1681	0.280345	-4.16665	3.09113e-05	0.00707888	Mtmr12	-6578
chr2_6349296_6349797	72.7171	-1.20202	0.288629	-4.1646	3.11902e-05	0.00707888	Usp6nl	-26630
chr4_139232411_139232912	88.3563	1.10279	0.26478	4.16493	3.11443e-05	0.00707888	Capzb	-39513
chr12_108241258_108241759	65.3903	-1.21718	0.292543	-4.16068	3.17305e-05	0.00714937	Ccdc85c	33667
chr19_44655662_44656163	77.1721	-1.14853	0.276092	-4.15996	3.18307e-05	0.00714937	Hif1an	-92813
chr12_111559991_111560492	30.2621	-2.05996	0.495708	-4.15559	3.24444e-05	0.00721248	Mark3	14031
chr13_111170347_111170848	74.526	1.32431	0.318613	4.15649	3.2317e-05	0.00721248	Actbl2	84165
chr11_58117084_58117585	157.836	0.94841	0.228325	4.15377	3.27049e-05	0.00723243	Cnot8	-12856
chr4_142160018_142160519	114.722	1.03036	0.248123	4.15263	3.28679e-05	0.00723243	Kazn	78883
chr12_12314958_12315459	185.053	0.937712	0.225878	4.15141	3.30434e-05	0.00723433	Fam49a	-52820
chr5_73563312_73563813	35.3278	1.9217	0.463736	4.14394	3.41382e-05	0.00743647	Lrrc66	68714
chr1_135186314_135186815	59.2379	1.25531	0.303307	4.13876	3.49187e-05	0.00756845	Gpr37l1	-18633
chr12_110781150_110781651	232.608	0.825635	0.199831	4.13166	3.6015e-05	0.00776723	Wdr20	-43207
chr11_35878198_35878699	86.991	-1.25456	0.304551	-4.11936	3.79918e-05	0.00809122	Wwc1	101829
chr18_76185711_76186212	104.994	-1.19612	0.290324	-4.11996	3.78934e-05	0.00809122	Smad2	55368
chr9_55041392_55041893	97.0878	-1.11447	0.270578	-4.11885	3.80772e-05	0.00809122	Chrnb4	6887
chr5_109556834_109557335	87.9287	-1.10514	0.268553	-4.11518	3.86886e-05	0.00818102	Crlf2	1659
chr4_45171195_45171696	42.6496	1.55669	0.378469	4.11312	3.90339e-05	0.00821399	Frmpd1	32229
chr16_94362086_94362587	58.0011	1.19476	0.290723	4.10961	3.96334e-05	0.00825995	Pigp	7703
chr19_45248801_45249302	46.0637	-1.5923	0.387406	-4.11016	3.95378e-05	0.00825995	Lbx1	-12989
chr1_170655504_170656005	91.52	-1.21804	0.29673	-4.10489	4.04509e-05	0.00830681	Olfml2b	-10973
chr18_88785159_88785660	97.8147	-1.22162	0.297498	-4.10631	4.02038e-05	0.00830681	Socs6	108693
chr7_112170164_112170665	130.469	0.976926	0.238048	4.1039	4.06248e-05	0.00830681	Dkk3	-11107
chr8_125285392_125285893	118.027	0.995933	0.242581	4.10557	4.03318e-05	0.00830681	Disc1	-231198
chr7_44866229_44866730	122.312	0.8929	0.217889	4.09797	4.16796e-05	0.00844284	Ptov1	3059
chr9_63757908_63758409	209.596	0.752946	0.183708	4.0986	4.15655e-05	0.00844284	Smad3	0
chr2_124522218_124522719	62.2275	1.27718	0.312004	4.09348	4.24954e-05	0.0084891	Sema6d	87882
chr3_138784206_138784707	96.9994	-1.15308	0.281566	-4.09523	4.21751e-05	0.0084891	Tspan5	-42012
chrX_98936991_98937492	361.546	0.725327	0.177183	4.09367	4.24606e-05	0.0084891	Yipf6	-676
chr12_100003028_100003529	67.3713	-1.28084	0.31363	-4.08393	4.42805e-05	0.00872507	Kcnk13	-38530
chr18_73132259_73132760	89.334	-1.17505	0.287684	-4.08452	4.41677e-05	0.00872507	Mex3c	440284
chr6_115252070_115252571	137.256	1.00188	0.245256	4.08502	4.40732e-05	0.00872507	Gm17482	-24728
chr6_115252070_115252571.1	137.256	1.00188	0.245256	4.08502	4.40732e-05	0.00872507	Syn2	-117154
chr6_115252070_115252571.2	137.256	1.00188	0.245256	4.08502	4.40732e-05	0.00872507	Timp4	0
chr12_12620222_12620723	30.8308	-1.85838	0.455421	-4.08058	4.49244e-05	0.00881189	Mycn	321192
chr2_103927750_103928251	57.9145	-1.3716	0.336327	-4.07818	4.53904e-05	0.00886319	Lmo2	41878
chr5_23165871_23166372	104.433	1.0485	0.257197	4.07663	4.56922e-05	0.00888211	Lhfpl3	-419813
chr11_32363502_32364003	112.371	0.903354	0.221742	4.0739	4.6233e-05	0.00894712	Sh3pxd2b	-15683
chr5_4486006_4486507	186.946	-0.828003	0.203598	-4.06686	4.76513e-05	0.0091806	Fzd1	271529
chr12_89041579_89042080	78.3115	-1.20913	0.298049	-4.0568	4.97499e-05	0.00954252	Nrxn3	-247076
chr12_24623848_24624349	102.361	1.03998	0.256644	4.05222	5.07331e-05	0.00967294	Klf11	26925
chr15_82288790_82289291	120.515	0.931767	0.230088	4.04962	5.13013e-05	0.00967294	2003-09-01	-13898
chr8_122709497_122709998	66.0993	-1.34474	0.331996	-4.05047	5.11142e-05	0.00967294	AC114005.5	-2798657
chrX_166779416_166779917	33.9495	-1.79427	0.443083	-4.04952	5.13224e-05	0.00967294	Egfl6	-193696
chr6_85320264_85320765	364.42	0.731042	0.180661	4.04649	5.19906e-05	0.00975645	Sfxn5	12658
chr4_155223105_155223606	617.785	0.549882	0.136005	4.0431	5.27501e-05	0.0098563	Ski	-513
chr5_111538577_111539078	44.9292	-1.39864	0.346114	-4.04098	5.32293e-05	0.00990317	Mn1	-121136
chr10_62194404_62194905	219.794	0.754686	0.18689	4.03813	5.38782e-05	0.00994209	Tspan15	36347
chr16_5926964_5927465	85.1611	1.00595	0.249117	4.03805	5.38972e-05	0.00994209	Rbfox1	421673
chr2_93176806_93177307	104.826	-1.07536	0.266636	-4.03308	5.50514e-05	0.0100579	Trp53i11	10241
chr2_101998560_101999061	52.8937	1.40032	0.347215	4.033	5.50688e-05	0.0100579	Ldlrad3	187325
chr7_129691681_129692182	162.034	0.816241	0.202457	4.03167	5.53822e-05	0.0100579	Wdr11	-99819
chr9_20794117_20794618	283.516	0.777786	0.192934	4.03137	5.54534e-05	0.0100579	Col5a3	20450
chr1_121280382_121280883	66.6963	1.21137	0.301076	4.02346	5.73492e-05	0.0100686	Insig2	51707
chr1_172242274_172242775	85.9717	1.0838	0.269166	4.02651	5.66099e-05	0.0100686	Atp1a4	15640
chr11_112355163_112355664	52.9182	1.29556	0.322144	4.02169	5.77818e-05	0.0100686	Sox9	426560
chr12_83781721_83782222	60.4427	-1.32578	0.32927	-4.02641	5.66344e-05	0.0100686	Papln	-18088
chr13_75295817_75296318	75.2251	-1.15475	0.287133	-4.02164	5.77953e-05	0.0100686	Pcsk1	-205992
chr15_10298126_10298627	40.5089	1.44712	0.359449	4.02593	5.67501e-05	0.0100686	Prlr	-120472
chr2_50654868_50655369	70.2158	-1.19339	0.296186	-4.02919	5.59693e-05	0.0100686	Mmadhc	-358151
chr4_128341045_128341546	41.5055	1.52424	0.379025	4.02148	5.78348e-05	0.0100686	Csmd2	-353002
chr5_82966126_82966627	93.159	-1.18777	0.295304	-4.0222	5.76566e-05	0.0100686	Tecrl	388569
chr9_71062348_71062849	57.864	1.29287	0.321214	4.02496	5.69842e-05	0.0100686	Aqp9	105809
chr17_7577224_7577725	67.9651	1.19769	0.298176	4.01671	5.90169e-05	0.0102333	Gm9992	-191919
chr6_30628062_30628563	90.2868	-1.25331	0.312311	-4.01302	5.99464e-05	0.0103531	Cpa5	-17012
chr7_75328977_75329478	46.1996	-1.54083	0.384056	-4.012	6.02054e-05	0.0103565	Sv2b	-19715
chr18_56562211_56562712	259.514	0.645344	0.160899	4.01086	6.04973e-05	0.0103581	Aldh7a1	10240
chr18_56562211_56562712.1	259.514	0.645344	0.160899	4.01086	6.04973e-05	0.0103581	Phax	0
chr5_120712638_120713139	65.6696	1.21678	0.303428	4.0101	6.06922e-05	0.0103581	Dtx1	-711
chr4_56088650_56089151	67.3626	-1.15312	0.287727	-4.00768	6.13194e-05	0.0103833	Klf4	-556184
chr8_69132099_69132600	49.3052	-1.32979	0.331808	-4.0077	6.13118e-05	0.0103833	Slc18a1	-42877
chr5_75696898_75697399	107.14	1.10193	0.27513	4.00511	6.1989e-05	0.0104559	Kit	-121983
chr17_9879581_9880082	157.695	0.910094	0.227311	4.00374	6.23483e-05	0.0104757	Pabpc6	-209877
chr15_30693669_30694170	188.689	0.836848	0.20909	4.00234	6.27188e-05	0.0104973	Ctnnd2	-521077
chr5_149403315_149403816	51.6456	-1.67642	0.419036	-4.00066	6.31668e-05	0.0105316	Medag	7933
chr9_27193622_27194123	111.335	-1.06252	0.265716	-3.9987	6.36908e-05	0.0105783	Jam3	-38229
chr11_51823180_51823681	104.039	1.00241	0.250988	3.99384	6.50116e-05	0.0107155	Jade2	33973
chr2_27352633_27353134	142.328	-0.916405	0.229433	-3.99421	6.49106e-05	0.0107155	Vav2	73900
chr1_36492340_36492841	80.1683	1.13168	0.283683	3.98924	6.62866e-05	0.0107219	Cnnm4	-20721
chr13_111925284_111925785	39.0506	-1.80303	0.451768	-3.99104	6.57832e-05	0.0107219	Map3k1	-116291
chr19_3895203_3895704	140.059	0.974974	0.244336	3.9903	6.59911e-05	0.0107219	Tcirg1	11430
chr4_106232374_106232875	215.165	0.801443	0.20082	3.99084	6.5839e-05	0.0107219	Usp24	83359
chr8_92404133_92404634	72.9374	1.20477	0.301954	3.9899	6.60998e-05	0.0107219	Irx5	-46509
chr7_97345153_97345654	44.6553	-1.4522	0.364142	-3.98799	6.66347e-05	0.0107381	Kctd21	-12827
chr16_92200644_92201145	147.702	0.866621	0.217429	3.98577	6.72624e-05	0.010755	Kcne2	91244
chr2_26329322_26329823	167.974	0.858411	0.215351	3.98611	6.71645e-05	0.010755	Gpsm1	-13808
chr9_41812506_41813007	67.6279	1.32483	0.332454	3.98499	6.74841e-05	0.010755	CT025619.2	-231766
chr2_93899448_93899949	60.6145	1.23972	0.311626	3.97824	6.94266e-05	0.0109439	Accsl	-30291
chr2_157170073_157170574	74.681	1.09211	0.274505	3.97845	6.93656e-05	0.0109439	Rbl1	33939
chr8_123097718_123098219	81.83	1.09683	0.275644	3.97916	6.91595e-05	0.0109439	AC114005.5	-3186878
chr8_123097718_123098219.1	81.83	1.09683	0.275644	3.97916	6.91595e-05	0.0109439	Spg7	-34731
chr9_47910439_47910940	71.5735	-1.27099	0.319589	-3.97694	6.98075e-05	0.0109641	Nxpe4	251083
chr1_172349917_172350418	377.384	0.679765	0.171007	3.97508	7.03569e-05	0.0109709	Kcnj10	-8708
chr13_47708026_47708527	80.3442	1.0902	0.274239	3.97538	7.02675e-05	0.0109709	Id4	552701
chr13_98654045_98654546	160.111	-0.982204	0.247236	-3.97273	7.10524e-05	0.0109768	Tmem174	-16635
chr15_96600143_96600644	97.3483	0.977525	0.245998	3.97371	7.07619e-05	0.0109768	Slc38a1	41607
chr9_65561971_65562472	105.333	0.936975	0.235872	3.97239	7.11545e-05	0.0109768	Plekho2	17569
chr3_52688365_52688866	30.8046	-1.94338	0.48963	-3.96909	7.21488e-05	0.0110907	Cog6	328351
chr15_72110491_72110992	44.6208	-1.66704	0.42035	-3.96584	7.31378e-05	0.0111755	Col22a1	-76264
chr2_4436165_4436666	102.836	-1.08112	0.272662	-3.96506	7.33772e-05	0.0111755	Frmd4a	-418422
chr3_8561614_8562115	268.558	-0.77106	0.194479	-3.96475	7.34739e-05	0.0111755	Stmn2	-52255
chr4_152834700_152835201	32.5266	1.51907	0.383296	3.96318	7.39588e-05	0.0111916	Nphp4	-350331
chr5_118891052_118891553	131.257	0.86665	0.2187	3.96274	7.4096e-05	0.0111916	Med13l	-330334
chr5_129761750_129762251	132.233	0.847389	0.213946	3.96076	7.47108e-05	0.0112453	Psph	25199
chr11_120223772_120224273	102.56	0.978705	0.247328	3.95712	7.58592e-05	0.0113394	Bahcc1	8674
chr9_64186263_64186764	50.4304	1.30614	0.330049	3.95741	7.57652e-05	0.0113394	Map2k1	66868
chr5_66889300_66889801	181.25	0.783397	0.198267	3.95123	7.77518e-05	0.0115823	Limch1	-143456
chr9_65231218_65231719	40.5483	-1.50019	0.379888	-3.94902	7.84709e-05	0.0116494	Parp16	-35866
chr5_102993908_102994409	61.0655	1.18994	0.301566	3.94587	7.95106e-05	0.0117635	Mapk10	216926
chr11_49778861_49779362	54.7082	-1.46899	0.373274	-3.93543	8.30487e-05	0.0118814	Gfpt2	14825
chr16_5475443_5475944	123.345	-0.969136	0.246209	-3.93623	8.27716e-05	0.0118814	Eef2kmt	-219460
chr16_85072640_85073141	129.37	0.935756	0.237655	3.93745	8.23515e-05	0.0118814	App	100626
chr18_54280924_54281425	41.4655	1.44575	0.36697	3.93968	8.15907e-05	0.0118814	Csnk1g3	-418812
chr2_78005602_78006103	47.6217	-3.54286	0.899808	-3.93735	8.23869e-05	0.0118814	Cwc22	-59227
chr2_125031806_125032307	39.6366	-1.65406	0.420222	-3.93616	8.27971e-05	0.0118814	Slc24a5	35817
chr2_166632594_166633095	101.34	-1.04461	0.265008	-3.9418	8.08735e-05	0.0118814	Prex1	80738
chr4_101450360_101450861	84.9198	-1.2445	0.315877	-3.93984	8.15364e-05	0.0118814	Ak4	-31084
chr9_16345142_16345643	40.3986	-1.61502	0.41004	-3.9387	8.19238e-05	0.0118814	Fat3	155643
chrX_98300711_98301212	36.3077	-1.72507	0.43834	-3.93546	8.30384e-05	0.0118814	Ar	-151943
chr10_81401519_81402020	139.734	0.813149	0.206721	3.93356	8.36967e-05	0.0119325	Nfic	53616
chr16_29711836_29712337	69.4123	-1.23145	0.313166	-3.93226	8.41505e-05	0.0119325	Opa1	-132503
chr2_47088641_47089142	60.2053	1.18615	0.301665	3.93203	8.42316e-05	0.0119325	Acvr2a	1724967
chr17_70488862_70489363	124.575	-0.889986	0.226421	-3.93067	8.47079e-05	0.0119609	Dlgap1	-519790
chr2_6594703_6595204	56.9147	-1.38269	0.351844	-3.92985	8.50005e-05	0.0119633	Celf2	800797
chr17_29073371_29073872	38.1566	1.52103	0.387368	3.92658	8.61625e-05	0.0120486	Cdkn1a	17107
chr5_111262773_111263274	73.26	1.09997	0.280101	3.92705	8.59946e-05	0.0120486	Ttc28	-382971
chr11_88588795_88589296	169.352	0.894204	0.227967	3.92252	8.76267e-05	0.0122139	Msi2	128887
chr15_100081527_100082028	141.384	0.857655	0.218777	3.92023	8.84661e-05	0.0122914	Dip2b	-42864
chr13_73429833_73430334	45.6669	1.27163	0.32454	3.91826	8.91892e-05	0.0123523	Lpcat1	36863
chr11_76290283_76290784	108.774	-0.955269	0.244166	-3.91237	9.1394e-05	0.0125375	Nxn	108357
chr6_108274303_108274804	79.2163	-1.28183	0.327617	-3.91258	9.13157e-05	0.0125375	Itpr1	-61208
chr9_30619277_30619778	85.8732	1.21312	0.31005	3.91266	9.12837e-05	0.0125375	Snx19	-192170
chr4_142362266_142362767	45.3592	1.32441	0.338625	3.91113	9.18657e-05	0.0125624	Kazn	-122865
chr15_65585407_65585908	47.1057	-1.535	0.392561	-3.91023	9.2209e-05	0.0125697	Efr3a	201132
chr5_135688773_135689274	443.039	0.507527	0.12982	3.90946	9.2503e-05	0.0125703	Por	0
chr3_35088264_35088765	151.454	0.897522	0.229776	3.90607	9.38094e-05	0.0126684	Sox2	-437860
chr4_114459639_114460140	79.3225	-1.15065	0.294563	-3.90631	9.37159e-05	0.0126684	Trabd2b	-52916
chr2_49672355_49672856	53.5762	-1.24765	0.319648	-3.90322	9.49215e-05	0.0127454	Kif5c	-53058
chr4_98654334_98654835	47.8215	-1.36068	0.348614	-3.9031	9.49676e-05	0.0127454	Inadl	-258544
chr13_95794205_95794706	42.4343	1.44593	0.370784	3.89966	9.63284e-05	0.0127571	Iqgap2	97217
chr4_55875301_55875802	88.7887	-0.995393	0.255254	-3.89961	9.63462e-05	0.0127571	Klf4	-342835
chr4_106467444_106467945	56.1361	-1.4665	0.375985	-3.90042	9.60277e-05	0.0127571	Pcsk9	-3115
chr4_151178934_151179435	58.3731	1.294	0.331866	3.89916	9.65263e-05	0.0127571	Camta1	682442
chr5_45220506_45221007	43.1585	1.55093	0.397633	3.90041	9.60312e-05	0.0127571	Qdpr	229230
chr11_36557261_36557762	30.4136	-1.87936	0.482431	-3.89561	9.79503e-05	0.0128668	Tenm2	678121
chr9_26698185_26698686	44.1879	-1.38333	0.355078	-3.89585	9.78544e-05	0.0128668	B3gat1	35042
chr17_45519069_45519570	33.1628	-1.81761	0.466972	-3.89234	9.92819e-05	0.0130023	Aars2	-12229
chr15_8659617_8660118	196.918	0.819898	0.210736	3.89064	9.99792e-05	0.0130255	Slc1a3	50292
chr2_164857378_164857879	118.658	0.947483	0.243623	3.88913	0.000100603	0.0130255	Pltp	0
chr5_113504672_113505173	50.9552	-1.33678	0.343734	-3.88899	0.000100661	0.0130255	Wscd2	-14226
chr8_120539494_120539995	36.66	-1.54478	0.397079	-3.89036	0.000100096	0.0130255	AC114005.5	-628654
chr8_120539494_120539995.1	36.66	-1.54478	0.397079	-3.89036	0.000100096	0.0130255	Gse1	-51048
chr13_71148676_71149177	60.8073	1.26512	0.325481	3.88691	0.000101529	0.0130987	RP23-442B10.2	-265729
chr15_6988168_6988669	137.389	0.887357	0.228398	3.88513	0.000102276	0.0131559	Osmr	-113199
chr12_108414834_108415335	31.6642	1.60305	0.412959	3.88187	0.000103658	0.0132161	Eml1	-4293
chr16_32551296_32551797	76.6615	1.12635	0.290079	3.8829	0.000103219	0.0132161	Zdhhc19	-55032
chr7_73302593_73303094	77.0749	1.1466	0.295352	3.88214	0.000103541	0.0132161	Rgma	72415
chr15_76142218_76142719	59.5008	1.17806	0.303947	3.87587	0.000106245	0.0135062	AC110211.1	-15662
chr10_84755814_84756315	151.129	0.825149	0.213039	3.87324	0.000107399	0.0136001	Rfx4	0
chr8_120289641_120290142	87.1311	-1.11358	0.287596	-3.87205	0.000107925	0.0136001	AC114005.5	-378801
chr9_42439416_42439917	43.2682	1.28141	0.330914	3.87234	0.000107796	0.0136001	Tbcel	32349
chr16_94826991_94827492	109.109	0.911176	0.235395	3.87084	0.000108463	0.0136283	Kcnj6	170205
chr5_139535287_139535788	82.6792	-1.1489	0.297004	-3.86829	0.000109599	0.0137313	Uncx	7706
chr18_47453266_47453767	66.0535	1.20723	0.312248	3.86624	0.000110527	0.0138076	Sema6a	-84436
chr5_131873021_131873522	41.592	-1.52298	0.393999	-3.86544	0.000110887	0.0138127	Auts2	-256416
chr13_53455110_53455611	127.43	0.996752	0.258007	3.86327	0.000111878	0.0138962	Msx2	17464
chr1_34894667_34895168	61.8282	1.15911	0.300872	3.85251	0.000116915	0.0140584	Plekhb2	-44692
chr1_157709043_157709544	105.684	-1.09008	0.282604	-3.85727	0.000114659	0.0140584	Sec16b	-202316
chr1_167013523_167014024	99.4201	-1.14188	0.296359	-3.85302	0.00011667	0.0140584	Fam78b	-12058
chr10_99592127_99592628	54.7307	-1.35985	0.3528	-3.85446	0.000115987	0.0140584	Csl	167031
chr10_122845511_122846012	66.0383	-1.21119	0.314088	-3.85622	0.000115153	0.0140584	Ppm1h	-166734
chr11_32232873_32233374	63.5492	-1.32568	0.343753	-3.85649	0.000115025	0.0140584	Nprl3	34334
chr18_11900735_11901236	81.646	1.08469	0.281678	3.85082	0.000117724	0.0140584	Cables1	-61516
chr18_34119490_34119991	62.8453	-1.15548	0.299885	-3.85308	0.000116639	0.0140584	Apc	100993
chr3_87974220_87974721	1726.97	0.730287	0.189507	3.85361	0.000116389	0.0140584	Nes	-3128
chr4_140258917_140259418	127.465	0.832152	0.21608	3.85113	0.000117576	0.0140584	Igsf21	-12133
chr7_136083578_136084079	67.2685	-1.25158	0.324942	-3.8517	0.000117303	0.0140584	Mki67	-367217
chr9_45346279_45346780	55.4907	-1.29899	0.336816	-3.85669	0.000114933	0.0140584	Tmprss13	-27180
chr9_100470910_100471411	82.8835	-1.04732	0.271797	-3.85332	0.000116528	0.0140584	Il20rb	15378
chr9_105349015_105349516	40.1084	-1.73843	0.451429	-3.85095	0.000117659	0.0140584	Nek11	46009
chr5_99504332_99504833	42.2203	-1.70847	0.443939	-3.84844	0.000118872	0.0141565	Rasgef1b	224230
chr19_33109988_33110489	44.7268	-1.50495	0.391604	-3.84303	0.000121523	0.0144326	Rnls	281777
chr18_67476084_67476585	100.244	0.965484	0.251289	3.84213	0.000121972	0.0144463	Prelid3a	-11236
chr7_4123662_4124163	387.156	0.668757	0.174137	3.8404	0.000122833	0.0145087	Ttyh1	-4133
chr11_102096866_102097367	77.2266	0.988475	0.257557	3.83789	0.000124098	0.0145228	Ppy	3953
chr16_35585176_35585677	70.3984	1.08291	0.282192	3.8375	0.000124293	0.0145228	Sema5b	-43815
chr6_113860897_113861398	147.333	-0.895128	0.233212	-3.83825	0.000123913	0.0145228	Atp2b2	180629
chr9_107323449_107323950	47.5178	-1.39719	0.363901	-3.83949	0.000123291	0.0145228	Hemk1	14401
chr2_5429705_5430206	62.7279	1.21731	0.317343	3.83596	0.000125076	0.014575	Camk1d	284310
chr10_7268328_7268829	36.7276	-1.52903	0.398705	-3.835	0.000125565	0.0145928	Cnksr3	-132822
chr15_95828721_95829222	61.8266	1.12839	0.294317	3.83393	0.00012611	0.0146169	Ano6	-37879
chr5_136486359_136486860	32.5581	-1.63216	0.425796	-3.8332	0.000126486	0.0146215	Cux1	80586
chr4_130539594_130540095	77.8511	-1.19826	0.312682	-3.8322	0.000127004	0.0146423	Nkain1	34079
chr11_64278172_64278673	43.3083	-1.48451	0.387485	-3.83113	0.000127556	0.0146669	Hs3st3a1	156659
chr5_134073657_134074158	119.779	-0.990019	0.25853	-3.82942	0.000128445	0.0147301	Gatsl2	25553
chr7_83580897_83581398	154.085	0.781791	0.204347	3.8258	0.000130346	0.0149086	Tmc3	3694
chr2_168248317_168248818	86.1658	-1.06812	0.279407	-3.8228	0.000131943	0.0150516	Mocs3	-17696
chr15_38300731_38301232	443.494	0.571651	0.149623	3.8206	0.000133126	0.0151455	Klf10	-25
chr4_139574270_139574771	508.279	0.471372	0.123397	3.81998	0.000133465	0.0151455	Iffo2	-43723
chr10_13082365_13082866	49.7505	-1.38077	0.361647	-3.81799	0.000134543	0.0151489	Plagl1	7922
chr5_16024591_16025092	42.6397	-1.45828	0.381937	-3.81813	0.000134465	0.0151489	Cacna2d1	-89804
chr6_111738900_111739401	42.9999	-1.55786	0.407943	-3.81881	0.000134098	0.0151489	Lmcd1	534357
chr11_57103714_57104215	91.5699	1.11863	0.293134	3.81612	0.000135565	0.015185	Gria1	-90669
chr4_97418549_97419050	119.508	-0.970546	0.254319	-3.81625	0.000135496	0.015185	RP23-313O9.1	165580
chr11_77850836_77851337	299.712	0.647217	0.169672	3.81452	0.000136449	0.0152447	Myo18a	-87591
chr11_8492294_8492795	51.0601	-1.30389	0.342108	-3.81136	0.000138207	0.0153619	Tns3	171741
chr6_104312959_104313460	87.0363	-1.2082	0.316977	-3.81164	0.000138047	0.0153619	Cntn6	179351
chr1_12811154_12811655	67.5089	1.04582	0.274646	3.80788	0.000140161	0.0153715	Sulf1	-118878
chr3_55353882_55354383	128.995	0.858959	0.225473	3.80959	0.000139196	0.0153715	Dclk1	-111519
chr4_57171741_57172242	119.522	0.920106	0.241617	3.80812	0.000140029	0.0153715	Epb41l4b	-28304
chr4_98019630_98020131	53.7385	-1.36556	0.358514	-3.80895	0.00013956	0.0153715	Nfia	-242023
chr5_142096448_142096949	105.917	-0.967983	0.254236	-3.80743	0.000140421	0.0153715	Sdk1	-854959
chr6_90463418_90463919	124.562	0.805185	0.211329	3.81009	0.000138915	0.0153715	Klf15	-843
chr11_53761777_53762278	93.0288	0.988092	0.259611	3.80605	0.000141205	0.0153891	Irf1	7736
chr2_162282111_162282612	45.5747	-1.29944	0.341429	-3.8059	0.000141292	0.0153891	Ptprt	378536
chr1_193389519_193390020	53.0245	-1.33562	0.35104	-3.80473	0.000141956	0.0154227	Camk1g	-19221
chr13_52029886_52030387	99.7769	0.903922	0.237624	3.80399	0.000142381	0.0154302	Gadd45g	-183209
chr13_99138509_99139010	44.3124	1.32373	0.348064	3.8031	0.000142894	0.0154472	Zfp366	45813
chr10_66849651_66850152	39.9272	1.45433	0.382636	3.80081	0.000144222	0.0155312	Reep3	246794
chr4_128428763_128429264	65.0305	1.086	0.285749	3.80053	0.000144388	0.0155312	Csmd2	-440720
chr7_112604097_112604598	42.7452	-1.50345	0.395671	-3.79975	0.000144844	0.0155411	Tead1	74720
chr8_12395090_12395591	261.32	0.598643	0.157573	3.79914	0.000145197	0.0155411	Sox1	0
chr1_11033400_11033901	47.5494	1.26573	0.33326	3.79803	0.00014585	0.0155726	Prex2	-39936
chr2_33014816_33015317	57.9125	-1.3892	0.365965	-3.79599	0.000147053	0.0156625	Garnl3	116120
chr10_130263194_130263695	73.5794	-1.21023	0.319129	-3.7923	0.000149257	0.015732	Neurod4	16546
chr13_53734860_53735361	112.55	0.826885	0.218011	3.79286	0.000148922	0.015732	Msx2	-261786
chr14_63681417_63681918	95.9241	0.883578	0.23302	3.79186	0.000149521	0.015732	Xkr6	-74915
chr17_66761838_66762339	49.7257	1.21562	0.320401	3.79406	0.000148202	0.015732	Ptprm	592119
chr7_122955457_122955958	71.0118	1.14897	0.302992	3.79208	0.00014939	0.015732	Rbbp6	14606
chr2_49840541_49841042	91.0366	-1.13741	0.30033	-3.7872	0.000152356	0.0159915	Lypd6b	-52854
chr1_61397831_61398332	57.04	-1.27133	0.335798	-3.78599	0.000153097	0.0160304	Pard3b	240492
chr4_140117383_140117884	69.6116	-1.18937	0.314307	-3.78412	0.000154255	0.0161128	Igsf21	128901
chr8_11089252_11089753	48.4751	-1.32998	0.351534	-3.78335	0.00015473	0.0161235	Irs2	-80794
chr6_54119844_54120345	88.2218	-1.03632	0.273978	-3.78251	0.000155257	0.0161396	Chn2	-80272
chr11_119965063_119965564	160.09	0.882008	0.233488	3.77754	0.000158387	0.0162595	Baiap2	-22301
chr17_45530223_45530724	92.4769	-1.04722	0.277109	-3.77909	0.000157403	0.0162595	Tcte1	-6790
chr2_32629195_32629696	120.551	0.863916	0.228721	3.77716	0.000158626	0.0162595	Ak1	-7438
chr4_98758434_98758935	62.661	-1.26035	0.33368	-3.77711	0.000158661	0.0162595	Kank4	58603
chr4_120850968_120851469	46.949	-1.36349	0.360986	-3.77711	0.000158657	0.0162595	Rims3	3350
chr4_140153534_140154035	121.695	0.893452	0.236457	3.7785	0.000157775	0.0162595	Igsf21	92750
chr14_13358029_13358530	38.4027	1.3879	0.367588	3.77571	0.000159555	0.0162753	Synpr	-73250
chr8_70227898_70228399	72.5221	1.06956	0.283275	3.77569	0.000159565	0.0162753	Armc6	6068
chr9_111606535_111607036	62.5262	-1.22625	0.325226	-3.77047	0.000162939	0.0165804	Stac	83313
chr5_114738534_114739035	52.6064	1.18192	0.31355	3.76948	0.000163585	0.0166072	Git2	34461
chr3_151366206_151366707	93.1784	-0.958848	0.254441	-3.76845	0.000164263	0.016637	Adgrl4	71180
chr3_34869919_34870420	71.945	-1.09607	0.29092	-3.7676	0.000164825	0.016655	Sox2	-219515
chr5_135579229_135579730	53.3678	1.19904	0.318343	3.76651	0.000165544	0.0166888	Ccl24	-6180
chr2_32628596_32629097	127.927	0.869474	0.230959	3.76462	0.000166802	0.0167766	Ak1	-6839
chr9_61549874_61550375	98.6252	0.96115	0.255744	3.75825	0.000171108	0.0171698	Tle3	-177492
chr6_36926526_36927027	30.6922	-1.74932	0.465598	-3.75715	0.000171859	0.0172054	Dgki	373158
chr1_12055761_12056262	106.233	0.929061	0.247317	3.75656	0.000172266	0.0172064	Sulf1	636015
chr1_81933040_81933541	51.7252	1.37267	0.365782	3.75271	0.000174936	0.0172337	Gm9747	299571
chr1_90514136_90514637	43.6895	1.28984	0.343518	3.75478	0.000173495	0.0172337	Cops8	88344
chr2_180451411_180451912	71.2185	1.09821	0.29261	3.75314	0.00017463	0.0172337	Slco4a1	4333
chr3_88541825_88542326	60.7283	-1.19092	0.317407	-3.75204	0.000175404	0.0172337	Rab25	5975
chr4_149255225_149255726	79.9474	1.05638	0.281526	3.75234	0.000175191	0.0172337	Kif1b	51967
chr5_30591041_30591542	41.6433	-1.37359	0.366135	-3.75159	0.00017572	0.0172337	Kcnk3	-2872
chr7_111785518_111786019	37.2424	-1.51619	0.403725	-3.75549	0.000173003	0.0172337	Galnt18	-5541
chr9_45380713_45381214	140.093	-0.866379	0.230894	-3.75228	0.00017523	0.0172337	Fxyd6	-10529
chr2_178698534_178699035	93.1125	0.983422	0.262476	3.74671	0.000179168	0.0175322	Cdh26	-268004
chr1_172064656_172065157	100.579	-0.974808	0.260233	-3.74591	0.000179744	0.0175489	Nhlh1	-7083
chr1_176929743_176930244	163.932	-0.832046	0.222391	-3.74136	0.000183028	0.017619	Sdccag8	-115084
chr16_15052844_15053345	58.1747	-1.2074	0.322546	-3.74336	0.000181575	0.017619	Efcab1	-146208
chr18_24326749_24327250	39.1746	1.38732	0.370846	3.74098	0.000183307	0.017619	Galnt1	-121406
chr4_45142319_45142820	90.7043	0.930426	0.248518	3.7439	0.000181188	0.017619	Tomm5	-34205
chr5_74172110_74172611	43.8571	1.30375	0.348361	3.74252	0.000182187	0.017619	Rasl11b	22675
chr7_101464876_101465377	40.7079	-1.43536	0.383623	-3.74159	0.000182857	0.017619	Pde2a	-43186
chr7_101464876_101465377.1	40.7079	-1.43536	0.383623	-3.74159	0.000182857	0.017619	RP23-194H4.2	-53991
chr9_102189377_102189878	83.8974	-0.992943	0.265312	-3.74255	0.00018216	0.017619	Ephb1	164816
chr14_20796645_20797146	62.7298	1.12368	0.300446	3.74004	0.000183995	0.017646	Camk2g	-2557
chr1_192696396_192696897	118.36	-0.935029	0.250175	-3.7375	0.00018586	0.0177855	Hhat	74317
chr2_30441662_30442163	66.6691	1.06366	0.284657	3.73664	0.000186497	0.0178072	Ppp2r4	-25624
chr6_146538583_146539084	39.0429	1.44035	0.385623	3.73513	0.000187615	0.0178745	Itpr2	-36405
chr9_103067523_103068024	76.5898	-1.12023	0.3001	-3.73285	0.000189326	0.017998	Slco2a1	-59522
chr13_34278288_34278789	92.7782	1.05618	0.283045	3.73149	0.000190354	0.0180561	Slc22a23	66394
chr14_77174435_77174936	195.835	-0.700145	0.187723	-3.72968	0.000191724	0.0181464	Enox1	-17673
chr14_79842851_79843352	73.3118	-1.11519	0.299259	-3.72649	0.000194163	0.0183372	Pcdh8	-71539
chr18_23090571_23091072	33.1344	-1.76415	0.47355	-3.72537	0.000195031	0.0183792	Nol4	-48918
chr2_167596620_167597121	36.6395	-1.51184	0.406082	-3.723	0.000196873	0.0185125	Ube2v1	34975
chr5_103194520_103195021	33.3711	1.58965	0.427187	3.72122	0.000198264	0.0185945	Mapk10	16314
chr6_77979466_77979967	290.452	-0.616608	0.16572	-3.72079	0.000198603	0.0185945	Ctnna2	0
chr1_135645758_135646259	75.4062	-1.17256	0.315305	-3.7188	0.00020017	0.0185951	Nav1	-38463
chr14_61012326_61012827	84.5701	0.967895	0.260172	3.72021	0.000199058	0.0185951	Tnfrsf19	33664
chr2_170838121_170838622	63.7954	1.14628	0.308193	3.71936	0.000199731	0.0185951	Dok5	-106315
chr5_46406996_46407497	57.9687	1.15964	0.311849	3.71861	0.000200326	0.0185951	Lcorl	-549381
chr11_86586748_86587249	60.7256	1.04754	0.28186	3.71652	0.000201988	0.0186716	Vmp1	96588
chr9_45592264_45592765	51.762	-1.22	0.328268	-3.71649	0.000202011	0.0186716	Dscaml1	-161974
chr4_136094787_136095288	102.514	1.00245	0.26979	3.71565	0.000202686	0.0186941	Rpl11	-41394
chr13_55510491_55510992	50.9245	1.20133	0.323515	3.71335	0.00020453	0.0187462	Pdlim7	2455
chr17_66358339_66358840	45.4417	1.25576	0.338121	3.71394	0.000204054	0.0187462	Mtcl1	90911
chr4_119453365_119453866	63.0604	1.11969	0.301576	3.7128	0.00020498	0.0187462	Zmynd12	-30552
chr7_96983858_96984359	57.8656	1.1936	0.321441	3.71328	0.000204589	0.0187462	Nars2	-32354
chr13_47053843_47054344	60.3934	1.18179	0.318564	3.70974	0.000207475	0.0187648	Kdm1b	-10345
chr17_63008210_63008711	71.5534	-1.16759	0.314668	-3.71055	0.000206807	0.0187648	Efna5	-126893
chr2_135278419_135278920	40.6982	-1.54546	0.416662	-3.70913	0.00020797	0.0187648	Plcb1	-492353
chr5_144881908_144882409	205.959	0.756526	0.203979	3.70884	0.000208214	0.0187648	Smurf1	83439
chr8_113873658_113874159	35.4111	-1.61229	0.434683	-3.70912	0.000207985	0.0187648	Adamts18	-25043
chr9_47266007_47266508	90.448	0.899505	0.242504	3.70924	0.000207883	0.0187648	Cadm1	263665
chr9_96888006_96888507	54.1998	-1.24208	0.334869	-3.70915	0.000207953	0.0187648	Pxylp1	968
chr9_92655646_92656147	44.986	1.3658	0.368323	3.70816	0.000208774	0.0187762	Plod2	-113424
chr13_39631611_39632112	118.287	0.921085	0.248503	3.70653	0.000210116	0.0188188	Slc35b3	-670736
chr7_132262572_132263073	45.9211	-1.42996	0.385743	-3.70704	0.0002097	0.0188188	Chst15	54156
chr7_132262572_132263073.1	45.9211	-1.42996	0.385743	-3.70704	0.0002097	0.0188188	Fgfr2	860278
chr8_25276199_25276700	175.468	0.83844	0.226493	3.70184	0.000214042	0.0191309	Tacc1	-74657
chr1_119001518_119002019	78.0197	-1.05265	0.28453	-3.69963	0.000215914	0.019219	Gli2	51601
chr2_51087516_51088017	46.1569	-1.34186	0.362672	-3.69992	0.000215664	0.019219	Rnd3	61095
chr13_51208374_51208875	91.6502	0.900753	0.243596	3.69773	0.000217534	0.0193235	Nxnl2	-37353
chr11_20858832_20859333	241.304	0.746199	0.201847	3.69685	0.000218292	0.0193512	Lgalsl	-27776
chr4_21628397_21628898	60.0505	-1.25673	0.340165	-3.69447	0.000220344	0.0194933	Prdm13	56886
chr7_46103240_46103741	78.2763	-1.03796	0.281044	-3.69322	0.000221434	0.0195329	Kcnj11	-3003
chr9_118228600_118229101	36.2164	-1.62614	0.440339	-3.69292	0.000221693	0.0195329	Cmc1	-78423
chr12_83791661_83792162	67.1576	-1.11068	0.300879	-3.69147	0.000222962	0.0195957	Papln	-28028
chr16_14377264_14377765	64.6532	-1.27922	0.346621	-3.69056	0.000223763	0.0195957	Abcc1	-15705
chr2_27247068_27247569	152.315	0.753659	0.204205	3.6907	0.000223634	0.0195957	Sardh	0
chr8_125355059_125355560	52.7118	-1.25428	0.33999	-3.68916	0.000224992	0.0196637	Sipa1l2	214249
chr10_89254671_89255172	42.8587	1.42267	0.385803	3.68757	0.000226408	0.0197476	Ano4	2451
chr1_73962929_73963430	219.46	0.718088	0.194838	3.68557	0.000228187	0.019844	Tns1	161020
chr1_192070168_192070669	64.8504	-1.06745	0.289649	-3.68531	0.000228428	0.019844	Traf5	21891
chr4_43040122_43040623	506.769	0.466157	0.126621	3.68152	0.000231846	0.0201006	Fam214b	5598
chr11_44696828_44697329	66.9614	-1.15922	0.314929	-3.6809	0.000232415	0.0201097	Ebf1	-79512
chr10_78167310_78167811	36.0993	-1.53791	0.418026	-3.67897	0.000234177	0.0202056	RP24-221D13.1	1972
chr14_25231803_25232304	164.477	0.679085	0.184647	3.67774	0.000235306	0.0202056	Zmiz1	226920
chr2_35803175_35803676	72.8754	1.07967	0.293502	3.67856	0.000234558	0.0202056	Ttll11	175949
chr8_125067029_125067530	148.864	0.839577	0.228291	3.67766	0.000235388	0.0202056	Disc1	-12835
chr2_151967216_151967717	77.0462	-1.03713	0.282062	-3.67694	0.000236045	0.0202219	Fam110a	12503
chr7_92696354_92696855	58.3918	1.24368	0.338463	3.67449	0.000238328	0.0203773	Pcf11	-26420
chr12_33193484_33193985	89.8799	0.926816	0.252408	3.67189	0.000240761	0.0205448	Atxn7l1	-45792
chr5_135850996_135851497	40.6714	-1.48932	0.405828	-3.66984	0.000242707	0.0206701	Srrm3	-32891
chr10_53679660_53680161	43.2251	1.3928	0.37958	3.66932	0.000243199	0.0206714	Fam184a	70963
chr4_139948426_139948927	159.269	0.80592	0.219671	3.66876	0.000243727	0.0206758	Klhdc7a	19100
chr10_110102141_110102642	73.532	-1.23571	0.33703	-3.66648	0.000245917	0.0206803	Nav3	-101922
chr11_36176113_36176614	73.4146	-1.09065	0.29741	-3.66716	0.000245255	0.0206803	Tenm2	1059269
chr4_57844942_57845443	91.5838	0.875584	0.238828	3.66617	0.000246208	0.0206803	Akap2	-102848
chr4_57844942_57845443.1	91.5838	0.875584	0.238828	3.66617	0.000246208	0.0206803	Pakap	-207120
chr4_148914874_148915375	92.8674	-0.949204	0.258911	-3.66613	0.000246245	0.0206803	Casz1	-110446
chr5_66861194_66861695	158.585	0.759301	0.207122	3.66597	0.000246408	0.0206803	Limch1	-115350
chr8_70757995_70758496	46.6843	-1.37259	0.374438	-3.66572	0.000246643	0.0206803	Rab3a	-3317
chr3_88363687_88364188	114.608	0.820302	0.223902	3.66367	0.000248624	0.0207661	Paqr6	396
chr7_19599644_19600145	50.9009	1.21767	0.332351	3.66381	0.000248488	0.0207661	Clasrp	4342
chr15_32003013_32003514	171.028	0.752299	0.205435	3.66198	0.000250276	0.0207839	Tas2r119	173775
chr18_61173126_61173627	83.9535	1.00028	0.273152	3.662	0.000250251	0.0207839	Hmgxb3	3424
chr6_127114817_127115318	60.0237	-1.23866	0.338196	-3.66254	0.000249725	0.0207839	Tigar	-5267
chr1_152556113_152556614	129.756	0.792233	0.216454	3.66006	0.000252161	0.0208605	Rgl1	209738
chr4_141245038_141245539	165.19	0.680782	0.185994	3.66024	0.000251979	0.0208605	Arhgef19	-2170
chr10_49447511_49448012	49.0855	1.23789	0.338267	3.65949	0.000252715	0.0208665	Grik2	340755
chr11_75869914_75870415	41.2893	-1.2864	0.351621	-3.65849	0.000253709	0.0208691	Rph3al	67324
chr6_111866117_111866618	149.254	-1.28383	0.350902	-3.65866	0.000253535	0.0208691	Lmcd1	407140
chr7_46602043_46602544	152.314	0.757671	0.207134	3.65788	0.000254313	0.0208792	Sergef	37264
chr2_153522230_153522731	51.0352	-1.27162	0.347762	-3.65657	0.000255611	0.0209066	Nol4l	7241
chr4_44518946_44519447	179.037	0.712004	0.194707	3.6568	0.000255379	0.0209066	Pax5	191041
chr2_49741791_49742292	90.3223	-0.994458	0.272032	-3.65566	0.00025652	0.0209414	Kif5c	-122494
chr13_59091271_59091772	136.327	0.80034	0.219043	3.6538	0.00025839	0.0210544	Ntrk2	-284703
chr19_58831350_58831851	51.0763	-1.18363	0.324413	-3.64854	0.000263731	0.0214091	Hspa12a	29134
chr7_66247650_66248151	137.629	0.887388	0.243214	3.64859	0.000263685	0.0214091	Gm10974	117754
chr19_60615485_60615986	71.3675	-1.07349	0.294448	-3.64576	0.000266602	0.0215615	Cacul1	-34462
chr2_131541614_131542115	53.6075	-1.34415	0.368647	-3.64617	0.000266176	0.0215615	Adra1d	20169
chr15_82992138_82992639	58.8288	-1.17939	0.323543	-3.64525	0.00026713	0.0215639	Nfam1	40668
chr11_62966966_62967467	129.784	0.853947	0.234303	3.64462	0.000267784	0.0215765	Cdrt4	-15774
chr8_28141927_28142428	92.8369	1.04468	0.287	3.63999	0.00027265	0.0219279	Poteg	-694258
chr4_130810792_130811293	121.892	0.811689	0.223147	3.63746	0.000275338	0.022103	Sdc3	-18256
chr5_75179661_75180162	40.3325	-1.6439	0.452164	-3.63563	0.000277301	0.0221376	Pdgfra	-27370
chr7_113765856_113766357	123.32	0.770449	0.211901	3.63588	0.000277031	0.0221376	Spon1	0
chr9_44071865_44072366	153.545	0.788571	0.216878	3.63601	0.000276889	0.0221376	RP24-329C11.10	41135
chr9_44071865_44072366.1	153.545	0.788571	0.216878	3.63601	0.000276889	0.0221376	Usp2	-4845
chr12_99026247_99026748	31.1057	-1.83104	0.503875	-3.63392	0.000279146	0.0222439	Ttc8	-105674
chr5_120358172_120358673	41.525	-1.34892	0.371308	-3.6329	0.000280254	0.0222913	Lhx5	73026
chr9_61402691_61403192	45.9162	1.25985	0.347009	3.6306	0.000282765	0.0224498	Tle3	-30309
chr11_107592462_107592963	71.9405	0.939959	0.259107	3.62769	0.000285966	0.0224872	Helz	-44507
chr12_111694886_111695387	132.869	0.742497	0.204673	3.62772	0.000285934	0.0224872	Trmt61a	-16782
chr13_54936103_54936604	53.341	-1.30575	0.35991	-3.62799	0.000285639	0.0224872	Unc5a	12807
chr16_43965944_43966445	117.715	0.990432	0.273046	3.62735	0.000286348	0.0224872	Zdhhc23	12649
chr5_27841502_27842003	95.6984	0.901914	0.248612	3.6278	0.000285845	0.0224872	Htr5a	146
chr5_30107674_30108175	115.316	0.810701	0.223482	3.62758	0.000286087	0.0224872	Gareml	-2514
chr17_45766716_45767217	161.798	0.73012	0.201314	3.62676	0.000286994	0.0224972	1600014C23Rik	-32872
chr15_81928159_81928660	70.0286	0.99361	0.274026	3.62597	0.000287878	0.0225256	Polr3h	-1919
chr18_79071162_79071663	82.0815	-0.986441	0.272579	-3.61892	0.000295829	0.0230979	Setbp1	37729
chr5_90655822_90656323	41.269	1.36889	0.378298	3.61855	0.000296256	0.0230979	Rassf6	-15165
chr3_147182359_147182860	70.6313	-1.11854	0.309229	-3.61718	0.000297833	0.0231376	Ttll7	-329993
chr5_32335060_32335561	75.2833	-1.16893	0.323139	-3.61741	0.000297571	0.0231376	Plb1	-102347
chr11_68233595_68234096	75.6929	-1.06252	0.293843	-3.61594	0.000299259	0.0231873	Ntn1	166728
chr18_13134525_13135026	52.0168	1.24489	0.344302	3.6157	0.000299543	0.0231873	Hrh4	-127536
chr13_48594521_48595022	108.082	0.833304	0.230534	3.61466	0.000300736	0.0232382	Ptpdc1	30643
chr12_100396695_100397196	48.4867	1.33448	0.36929	3.61365	0.000301918	0.0232482	Ttc7b	123631
chr16_74089894_74090395	52.3162	-1.41459	0.391458	-3.61363	0.000301939	0.0232482	Robo2	321391
chr4_89368744_89369245	86.4777	-1.1089	0.306911	-3.6131	0.00030256	0.0232547	Cdkn2b	-57712
chr11_35668709_35669210	90.8205	-0.990755	0.274268	-3.61237	0.000303416	0.0232793	Slit3	-547486
chr10_83620321_83620822	37.0401	-1.3567	0.375827	-3.6099	0.000306313	0.0234113	Appl2	27917
chr14_39043804_39044305	35.9688	-1.54739	0.42875	-3.60907	0.000307297	0.0234113	Nrg3	428784
chr8_84655552_84656053	54.8095	1.07571	0.298029	3.60941	0.000306897	0.0234113	Ier2	6800
chr9_44724252_44724753	89.4383	0.895003	0.247928	3.60993	0.000306282	0.0234113	Phldb1	10446
chr14_79872424_79872925	46.829	-1.38055	0.38275	-3.60692	0.000309852	0.0235645	Pcdh8	-101112
chr16_5713375_5713876	34.6858	-1.42175	0.394334	-3.60545	0.000311618	0.023576	Eef2kmt	-457392
chr17_45584207_45584708	137.406	0.754551	0.209268	3.60566	0.000311359	0.023576	Hsp90ab1	-10936
chr7_55744675_55745176	50.2291	-1.24425	0.345104	-3.60543	0.000311634	0.023576	Siglech	23008
chr1_3514565_3515066	37.4789	-1.46324	0.405895	-3.60497	0.000312187	0.0235766	Xkr4	156433
chr8_94551614_94552115	110.363	0.816398	0.226521	3.60408	0.000313262	0.0236167	Cpne2	-18625
chr4_97235914_97236415	42.603	-1.32469	0.367628	-3.60335	0.000314142	0.0236419	Gm10192	-52748
chr15_87184158_87184659	47.8221	-1.22731	0.340726	-3.60203	0.000315744	0.0236803	Fam19a5	359640
chr15_100105207_100105708	46.1866	1.21506	0.337297	3.60235	0.000315349	0.0236803	Dip2b	-66544
chr4_133508935_133509436	64.1025	-1.19199	0.331032	-3.60084	0.000317193	0.0237069	Kdf1	9556
chr5_137759841_137760342	310.817	0.571507	0.158699	3.6012	0.000316755	0.0237069	Tsc22d4	-14112
chr3_104794411_104794912	110.995	0.781897	0.21732	3.5979	0.000320801	0.0239353	Mov10	23652
chr3_104794411_104794912.1	110.995	0.781897	0.21732	3.5979	0.000320801	0.0239353	Rhoc	-6037
chr15_93084978_93085479	52.4138	-1.22143	0.33974	-3.5952	0.000324149	0.0240608	Gxylt1	189701
chr18_73134925_73135426	51.2808	-1.19606	0.33265	-3.59554	0.000323714	0.0240608	Mex3c	437618
chr3_69520132_69520633	68.2839	-1.12039	0.311597	-3.59563	0.00032361	0.0240608	Ppm1l	-203272
chr11_32591808_32592309	51.7435	-1.21638	0.338412	-3.59437	0.000325173	0.0240956	Stk10	-58504
chr2_154163244_154163745	95.5039	0.866402	0.24112	3.59325	0.000326584	0.0241589	Bpifa5	-638
chr1_74391269_74391770	161.555	0.66004	0.183786	3.59135	0.000328973	0.0242917	Ctdsp1	0
chr16_10452420_10452921	168.254	0.781576	0.217653	3.59093	0.0003295	0.0242917	Tvp23a	-5058
chr2_31068649_31069150	56.094	1.07622	0.299812	3.58966	0.000331113	0.0243025	Fnbp1	72859
chr6_84594617_84595118	147.846	0.744348	0.207322	3.59029	0.000330309	0.0243025	Cyp26b1	-709
chr8_84485793_84486294	60.4381	-1.1245	0.313277	-3.58949	0.000331329	0.0243025	Cacna1a	-70430
chr1_128994496_128994997	82.6278	-1.03272	0.28787	-3.58746	0.000333913	0.0243114	Thsd7b	278347
chr10_19309967_19310468	92.1964	-0.973637	0.271385	-3.58765	0.000333669	0.0243114	Olig3	46065
chr10_71667044_71667545	39.7013	-1.43731	0.400514	-3.58866	0.000332378	0.0243114	Ipmk	-319282
chr12_4507418_4507919	64.3902	1.04301	0.290745	3.58738	0.00033402	0.0243114	Ncoa1	-30236
chr19_4548206_4548707	65.1568	1.07362	0.299293	3.58719	0.000334255	0.0243114	Pcx	-37694
chr1_89495003_89495504	66.0852	1.13192	0.315888	3.5833	0.000339279	0.0245259	Agap1	-40198
chr12_5637427_5637928	31.3188	-1.70331	0.475197	-3.58443	0.000337812	0.0245259	Klhl29	-261745
chr12_112510980_112511481	50.9447	1.18214	0.32986	3.58375	0.000338699	0.0245259	Tmem179	5267
chr19_21742023_21742524	75.5028	-1.04672	0.292159	-3.58272	0.000340032	0.0245259	Tmem2	35818
chr2_12292286_12292787	45.7459	-1.37063	0.38255	-3.58289	0.000339815	0.0245259	Itga8	9136
chr14_102926043_102926544	110.543	-1.0205	0.284946	-3.58139	0.00034177	0.0246103	Kctd12	56094
chr18_37824123_37824624	160.34	0.747994	0.208957	3.57966	0.000344044	0.0246603	Pcdhga1	-162331
chr18_37824123_37824624.1	160.34	0.747994	0.208957	3.57966	0.000344044	0.0246603	Pcdhga10	-77131
chr18_37824123_37824624.2	160.34	0.747994	0.208957	3.57966	0.000344044	0.0246603	Pcdhga11	-68393
chr18_37824123_37824624.3	160.34	0.747994	0.208957	3.57966	0.000344044	0.0246603	Pcdhga12	-58544
chr18_37824123_37824624.4	160.34	0.747994	0.208957	3.57966	0.000344044	0.0246603	Pcdhga2	-155171
chr18_37824123_37824624.5	160.34	0.747994	0.208957	3.57966	0.000344044	0.0246603	Pcdhga3	-149817
chr18_37824123_37824624.6	160.34	0.747994	0.208957	3.57966	0.000344044	0.0246603	Pcdhga4	-138914
chr18_37824123_37824624.7	160.34	0.747994	0.208957	3.57966	0.000344044	0.0246603	Pcdhga5	-129744
chr18_37824123_37824624.8	160.34	0.747994	0.208957	3.57966	0.000344044	0.0246603	Pcdhga6	-117085
chr18_37824123_37824624.9	160.34	0.747994	0.208957	3.57966	0.000344044	0.0246603	Pcdhga7	-109360
chr18_37824123_37824624.10	160.34	0.747994	0.208957	3.57966	0.000344044	0.0246603	Pcdhga8	-98418
chr18_37824123_37824624.11	160.34	0.747994	0.208957	3.57966	0.000344044	0.0246603	Pcdhga9	-87188
chr18_37824123_37824624.12	160.34	0.747994	0.208957	3.57966	0.000344044	0.0246603	Pcdhgb1	-143891
chr18_37824123_37824624.13	160.34	0.747994	0.208957	3.57966	0.000344044	0.0246603	Pcdhgb2	-134296
chr18_37824123_37824624.14	160.34	0.747994	0.208957	3.57966	0.000344044	0.0246603	Pcdhgb4	-103755
chr18_37824123_37824624.15	160.34	0.747994	0.208957	3.57966	0.000344044	0.0246603	Pcdhgb5	-93115
chr18_37824123_37824624.16	160.34	0.747994	0.208957	3.57966	0.000344044	0.0246603	Pcdhgb6	-82030
chr18_37824123_37824624.17	160.34	0.747994	0.208957	3.57966	0.000344044	0.0246603	Pcdhgb7	-72524
chr18_37824123_37824624.18	160.34	0.747994	0.208957	3.57966	0.000344044	0.0246603	Pcdhgc3	-17714
chr18_37824123_37824624.19	160.34	0.747994	0.208957	3.57966	0.000344044	0.0246603	Pcdhgc4	-9045
chr18_37824123_37824624.20	160.34	0.747994	0.208957	3.57966	0.000344044	0.0246603	Pcdhgc5	-4611
chr18_37824123_37824624.21	160.34	0.747994	0.208957	3.57966	0.000344044	0.0246603	RP23-407E2.4	-871383
chr18_37824123_37824624.22	160.34	0.747994	0.208957	3.57966	0.000344044	0.0246603	RP23-407E2.5	-854208
chr18_37824123_37824624.23	160.34	0.747994	0.208957	3.57966	0.000344044	0.0246603	RP23-407E2.6	-848183
chr18_39030824_39031325	61.5819	-1.18073	0.329853	-3.57956	0.000344171	0.0246603	Arhgap26	-37680
chr4_47713339_47713840	45.2254	-1.33732	0.373581	-3.57972	0.000343961	0.0246603	Sec61b	-238682
chr15_78369502_78370003	127.972	0.856895	0.239605	3.57628	0.00034852	0.0248896	Tex33	25910
chr2_21292596_21293097	156.73	-0.75252	0.210415	-3.57636	0.000348415	0.0248896	Gpr158	74445
chr16_20622254_20622755	92.3932	-0.961103	0.268944	-3.57362	0.000352079	0.0250389	RP23-101H1.18	-10645
chr7_96480590_96481091	38.3766	-1.44511	0.404405	-3.57342	0.000352344	0.0250389	Tenm4	-309345
chr8_14967948_14968449	44.849	1.23287	0.345	3.57353	0.000352205	0.0250389	Arhgef10	-56286
chr2_130491494_130491995	81.9528	1.04695	0.293234	3.57035	0.000356498	0.0252116	Ptpra	-41217
chr2_164520715_164521216	31.9512	1.43012	0.400537	3.5705	0.000356294	0.0252116	Pigt	-23196
chr5_65900930_65901431	62.4618	-1.20871	0.338542	-3.57034	0.000356518	0.0252116	Rhoh	-39718
chr5_73601214_73601715	76.3693	1.04101	0.291662	3.56923	0.00035803	0.0252773	Lrrc66	30812
chr13_73446813_73447314	184.674	0.705649	0.197738	3.56861	0.000358881	0.0252962	Lpcat1	19883
chr8_84634899_84635400	100.533	-0.949954	0.26625	-3.5679	0.000359856	0.0253237	Cacna1a	-219536
chr15_25673196_25673697	40.1238	-1.31769	0.369419	-3.56692	0.000361204	0.0253446	Myo10	-50672
chr17_43114211_43114712	114.183	-0.987186	0.276768	-3.56683	0.000361322	0.0253446	Tnfrsf21	-97657
chr17_87478457_87478958	68.8197	-1.05536	0.295932	-3.56621	0.000362184	0.025364	Calm2	-31522
chr15_88693966_88694467	55.305	1.08488	0.304424	3.56371	0.000365645	0.0255651	Brd1	39767
chr10_115694183_115694684	56.6915	1.12683	0.316581	3.55937	0.000371744	0.0258249	Lgr5	-106403
chr14_72389639_72390140	63.6241	-1.12601	0.316296	-3.55998	0.00037088	0.0258249	RP24-199E5.2	101699
chr15_62092784_62093285	33.3632	1.36075	0.382288	3.5595	0.000371564	0.0258249	Myc	-107394
chr3_89622693_89623194	107.581	0.878234	0.246714	3.55973	0.000371242	0.0258249	Kcnn3	-102530
chr1_38410386_38410887	91.9521	0.975736	0.274385	3.55608	0.00037643	0.0259496	Aff3	216299
chr11_96934876_96935377	46.6175	1.18448	0.333348	3.55328	0.000380456	0.0259496	Prr15l	-5575
chr12_12877519_12878020	142.94	-0.827256	0.232808	-3.55338	0.000380315	0.0259496	Mycn	63895
chr17_60925926_60926427	68.6793	-1.02179	0.287573	-3.55314	0.000380666	0.0259496	Nudt12	-1912554
chr2_139311227_139311728	39.8263	-1.35345	0.380922	-3.5531	0.000380723	0.0259496	Sptlc3	182185
chr2_165201663_165202164	100.735	0.898478	0.252681	3.55578	0.000376859	0.0259496	Cdh22	32690
chr3_139886477_139886978	281.226	-0.70608	0.198505	-3.55699	0.000375125	0.0259496	Stpg2	-680784
chr4_63338298_63338799	66.3378	-1.08185	0.304122	-3.55728	0.000374721	0.0259496	Orm1	5761
chr4_80864487_80864988	135.945	-0.919062	0.258636	-3.5535	0.000380141	0.0259496	Tyrp1	-30181
chr4_103922400_103922901	87.4318	-1.03084	0.289882	-3.55607	0.000376443	0.0259496	Dab1	444689
chr7_45466294_45466795	107.679	0.788773	0.221983	3.5533	0.000380423	0.0259496	Bax	104
chr7_45466294_45466795.1	107.679	0.788773	0.221983	3.5533	0.000380423	0.0259496	RP23-218K15.5	20017
chr7_64728136_64728637	99.6165	-0.896079	0.252173	-3.55343	0.000380241	0.0259496	Apba2	-226431
chr6_91718511_91719012	48.2778	-1.33093	0.374739	-3.55161	0.000382881	0.0260558	Slc6a6	-34459
chr2_128698603_128699104	106.739	0.797993	0.224734	3.55083	0.000384021	0.0260923	Mertk	0
chr1_56833236_56833737	51.4644	-1.21973	0.343626	-3.54959	0.000385826	0.0261023	Satb2	138766
chr1_73418045_73418546	30.2175	-1.68201	0.474038	-3.54826	0.000387781	0.0261023	Tnp1	-402136
chr17_78889085_78889586	42.8656	-1.29179	0.363943	-3.54944	0.00038605	0.0261023	Sult6b1	17314
chr19_53821292_53821793	113.826	0.960378	0.270515	3.55018	0.000384963	0.0261023	Rbm20	-143987
chr3_89430073_89430574	423.854	0.473931	0.13356	3.54845	0.000387502	0.0261023	Pygo2	0
chr6_113933195_113933696	227.648	0.668505	0.188389	3.54853	0.000387393	0.0261023	Atp2b2	108331
chr17_8343397_8343898	52.0344	1.09324	0.308155	3.5477	0.000388615	0.0261179	Prr18	-2992
chr6_141246377_141246878	45.7049	-1.29147	0.364169	-3.54636	0.000390593	0.0262102	Pde3a	2391
chr2_4436861_4437362	161.165	-0.782089	0.220593	-3.5454	0.00039202	0.0262653	Frmd4a	-419118
chr1_93227324_93227825	105.281	-0.866544	0.244484	-3.54438	0.000393541	0.026286	Crocc2	-58600
chr4_21674008_21674509	31.6881	-1.67411	0.472318	-3.54445	0.000393437	0.026286	Prdm13	11275
chr5_38499216_38499717	99.3846	1.0497	0.296234	3.54349	0.00039487	0.0263342	Slc2a9	3427
chr16_29893742_29894243	107.144	0.798898	0.225581	3.54152	0.000397836	0.0264101	Gm1968	68065
chr5_74059608_74060109	57.8208	-1.20177	0.339319	-3.5417	0.000397562	0.0264101	Usp46	8323
chr7_111412853_111413354	71.6519	0.963195	0.271953	3.54177	0.000397455	0.0264101	Eif4g2	-329823
chr11_98783252_98783753	116.106	0.801695	0.226524	3.53912	0.000401468	0.0266104	Nr1d1	-7919
chr4_156197724_156198225	353.77	0.535989	0.151467	3.53865	0.000402179	0.0266169	Agrn	-236
chr3_37231171_37231672	66.5556	1.0398	0.293932	3.53756	0.000403848	0.0266866	Il21	947
chr6_120192160_120192661	51.33	1.06411	0.30088	3.53665	0.000405235	0.0267375	Ninj2	-98811
chr2_31253392_31253893	53.5157	1.12814	0.31922	3.53406	0.000409235	0.0269604	Ncs1	-7570
chr14_55020417_55020918	71.5072	0.988931	0.279899	3.53317	0.000410614	0.0270102	Ngdn	-4964
chr15_25915751_25916252	99.8158	-0.978024	0.276862	-3.53254	0.000411588	0.0270138	Retreg1	-72572
chr4_131243905_131244406	81.3298	0.899563	0.254694	3.53193	0.000412539	0.0270138	Matn1	-299521
chr9_87298855_87299356	63.1157	-1.27995	0.362391	-3.53196	0.000412487	0.0270138	Cep162	-43319
chr15_21130614_21131115	31.048	-1.50406	0.425945	-3.53111	0.000413821	0.0270569	Cdh12	-20490
chr10_39541452_39541953	110.55	0.864963	0.245002	3.53044	0.000414875	0.027085	Fyn	-171689
chr17_9580047_9580548	142.998	0.822882	0.233169	3.52912	0.000416939	0.0271788	Pabpc6	89157
chr8_121857712_121858213	104.041	0.829307	0.235056	3.52812	0.000418517	0.0272407	AC114005.5	-1946872
chr6_101385397_101385898	323.663	0.676649	0.191813	3.52765	0.000419265	0.0272419	Pdzrn3	-7500
chr9_110835991_110836492	37.0317	1.27211	0.360646	3.52732	0.000419793	0.0272419	Prss45	-1404
chr5_112997728_112998229	61.6308	1.05876	0.300211	3.52672	0.000420745	0.0272629	Adrbk2	17563
chr1_138547785_138548286	79.3246	-1.04729	0.29708	-3.52528	0.000423037	0.0273297	Nek7	71856
chr9_114930595_114931096	152.431	0.698588	0.198156	3.52545	0.00042277	0.0273297	Gpd1l	2892
chr11_22698504_22699005	147.226	-0.794147	0.225298	-3.52487	0.000423688	0.027331	RP23-242C19.8	160541
chr18_31634697_31635198	783.596	-0.493025	0.139902	-3.52408	0.00042495	0.0273717	Sap130	-327
chr5_125685949_125686450	34.7008	-1.32924	0.377241	-3.52359	0.000425739	0.0273818	Tmem132b	-153563
chr10_128498572_128499073	231.331	0.563168	0.159868	3.5227	0.000427168	0.0274204	Myl6b	0
chr17_88316462_88316963	71.8172	-1.20326	0.341598	-3.52243	0.000427604	0.0274204	Foxn2	123748
chr1_73944379_73944880	216.093	0.694409	0.197192	3.52149	0.000429133	0.0274206	Tns1	179570
chr11_113969992_113970493	30.6128	-1.62718	0.462225	-3.52031	0.000431043	0.0274206	Sdk2	95726
chr13_51573829_51574330	112.806	0.771575	0.219192	3.52009	0.000431403	0.0274206	Shc3	-6745
chr17_80148022_80148523	112.934	0.838067	0.238011	3.52112	0.000429726	0.0274206	Galm	-20552
chr2_130818808_130819309	102.199	0.957712	0.272064	3.52016	0.000431279	0.0274206	RP23-175J8.3	20837
chr5_104110276_104110777	186.395	0.704944	0.200193	3.52132	0.000429405	0.0274206	Sparcl1	2957
chr2_180758899_180759400	37.007	-1.44368	0.410181	-3.51962	0.000432165	0.0274289	Bhlhe23	17501
chr8_91801318_91801819	166.338	0.638337	0.1814	3.51894	0.000433269	0.0274588	Irx3	249
chr11_76255520_76256021	39.3672	-1.46493	0.416461	-3.51758	0.000435505	0.027518	Mrm3	-11806
chr17_56509573_56510074	87.6927	-0.907164	0.257913	-3.51733	0.000435908	0.027518	Znrf4	2410
chr5_101425992_101426493	79.5116	-1.0119	0.287701	-3.51721	0.000436109	0.027518	Nkx6-1	238504
chr1_80541492_80541993	80.2403	1.09695	0.311956	3.51635	0.000437518	0.0275268	Dock10	123283
chr4_117645099_117645600	104.378	-0.857972	0.243973	-3.51667	0.000436999	0.0275268	Eri3	-94735
chr14_68981320_68981821	39.1904	-1.43458	0.408339	-3.51321	0.000442721	0.0277735	Stc1	47417
chr2_146221849_146222350	122.531	-0.929675	0.264604	-3.51346	0.00044231	0.0277735	Insm1	0
chr17_7291927_7292428	79.3488	-0.925985	0.263667	-3.51195	0.000444827	0.0278653	Rps6ka2	-121813
chr5_142473581_142474082	109.706	0.883964	0.251759	3.51116	0.000446162	0.0279086	Ap5z1	-9528
chr16_89950779_89951280	33.8105	-1.4468	0.41243	-3.50799	0.000451512	0.0282026	Tiam1	23420
chr6_64727580_64728081	45.8988	-1.31816	0.375804	-3.50756	0.000452241	0.0282075	Atoh1	1044
chr4_46957898_46958399	56.4028	-1.1197	0.319485	-3.5047	0.000457129	0.0284714	Gabbr2	33475
chr6_90495362_90495863	121.14	0.821894	0.234688	3.50207	0.000461652	0.0287119	Klf15	-32787
chr11_89086299_89086800	41.1598	1.25074	0.3575	3.49858	0.000467749	0.0289831	RP23-176J13.10	-12459
chr15_25120410_25120911	51.3353	-1.27038	0.363131	-3.49842	0.000468019	0.0289831	Basp1	292854
chr3_128520535_128521036	77.8411	-1.04695	0.299212	-3.49903	0.000466954	0.0289831	RP23-173N16.6	-624211
chr10_91888563_91889064	75.0407	-1.08516	0.310326	-3.49683	0.000470821	0.0290015	Tmpo	-716981
chr10_121121547_121122048	38.1284	1.33087	0.380597	3.49681	0.000470858	0.0290015	Wif1	-87588
chr11_115276739_115277240	273.461	0.52671	0.150644	3.49638	0.000471617	0.0290015	Fdxr	0
chr12_5219950_5220451	81.0267	1.12278	0.321129	3.49635	0.000471662	0.0290015	Klhl29	155232
chr2_32423826_32424327	123.071	0.715849	0.204696	3.49714	0.000470272	0.0290015	Slc25a25	27119
chr12_112263568_112264069	60.7296	-1.03162	0.295159	-3.49514	0.00047382	0.0290518	Kif26a	-117361
chr7_79362105_79362606	226.837	0.651522	0.186404	3.49521	0.000473691	0.0290518	Abhd2	-88907
chr15_8867141_8867642	89.5708	0.999064	0.285918	3.49423	0.000475432	0.0291095	Ranbp3l	100784
chr1_155062886_155063387	138.226	-0.776476	0.222367	-3.49187	0.000479652	0.0292919	Ier5	36250
chr6_120580000_120580501	250.1	-0.722632	0.206951	-3.49181	0.000479763	0.0292919	Cecr5	-48681
chr1_34696493_34696994	77.0912	0.956602	0.274011	3.49111	0.000481022	0.0293275	Arhgef4	-18306
chr11_97818537_97819038	81.2142	0.917583	0.262892	3.49034	0.000482408	0.0293389	Lasp1	-18973
chr12_111513614_111514115	114.243	0.957441	0.27432	3.49024	0.000482591	0.0293389	Eif5	23901
chr2_124641111_124641612	38.4015	-1.33654	0.383016	-3.4895	0.000483917	0.0293389	Sema6d	-30511
chr7_115170343_115170844	107.412	0.821397	0.235375	3.48975	0.00048348	0.0293389	Insc	-401608
chr10_83261343_83261844	34.3938	1.40442	0.402845	3.48625	0.000489846	0.0294921	Slc41a2	76039
chr14_61155100_61155601	44.386	-1.22261	0.350593	-3.48726	0.000487996	0.0294921	Sacs	-16644
chr18_57704134_57704635	31.0455	-1.66731	0.478218	-3.4865	0.000489381	0.0294921	AC102232.1	-170355
chr8_126698820_126699321	55.8491	1.11188	0.318842	3.48725	0.000488011	0.0294921	Irf2bp2	-104834
chr9_48736300_48736801	56.9062	1.09882	0.315158	3.48657	0.000489258	0.0294921	Zbtb16	99422
chr12_87040772_87041273	43.096	-1.24899	0.358309	-3.4858	0.000490677	0.0295012	Tmem63c	-14481
chr1_159670783_159671284	158.878	0.730203	0.209526	3.48503	0.00049209	0.0295043	Tnr	-147015
chr11_71840894_71841395	37.1949	-1.3103	0.375949	-3.48532	0.000491547	0.0295043	Wscd1	-90210
chr4_155264930_155265431	50.2976	-1.20722	0.346441	-3.48463	0.00049282	0.0295073	Prkcz	95931
chr7_99603887_99604388	82.7631	0.997434	0.286383	3.48287	0.000496072	0.029661	Arrb1	-68422
chr14_122885872_122886373	80.7297	-1.07611	0.309138	-3.48099	0.00049956	0.0298284	Ggact	26790
chr14_122885872_122886373.1	80.7297	-1.07611	0.309138	-3.48099	0.00049956	0.0298284	Pcca	-351534
chr11_3853361_3853862	91.9211	-1.04233	0.299663	-3.47833	0.000504542	0.0300449	Osbp2	10042
chr3_139023571_139024072	37.0491	-1.41201	0.405947	-3.47832	0.000504572	0.0300449	Rap1gds1	51130
chr3_32749889_32750390	34.3192	-1.44973	0.4169	-3.4774	0.0005063	0.0301065	Mrpl47	-12742
chr13_69720984_69721485	31.9061	1.32041	0.379776	3.47682	0.000507396	0.0301303	Ube2ql1	18405
chr16_18686835_18687336	169.615	0.650466	0.187124	3.47613	0.000508702	0.0301655	2005-09-01	-56897
chr2_181463070_181463571	236.701	-0.644547	0.18544	-3.47577	0.000509381	0.0301655	Zbtb46	-3644
chr13_48593086_48593587	123.501	0.778389	0.224036	3.47439	0.00051202	0.0302804	Ptpdc1	32078
chr3_55084748_55085249	33.1282	-1.50976	0.434685	-3.47323	0.000514242	0.0303704	Spg20	27138
chr14_31899310_31899811	38.6744	1.22949	0.354067	3.47248	0.000515669	0.0303857	Ankrd28	-68659
chr2_65690423_65690924	36.4995	-1.41657	0.407969	-3.47224	0.000516143	0.0303857	Scn2a1	-69653
chr2_150663134_150663635	64.0096	1.05048	0.302559	3.472	0.000516604	0.0303857	Acss1	4624
chr9_108825064_108825565	84.4988	-1.06958	0.308093	-3.47162	0.000517337	0.0303876	Celsr3	755
chr7_132688666_132689167	116.221	0.818746	0.235873	3.47113	0.000518274	0.0304015	Fgfr2	434184
chr7_132688666_132689167.1	116.221	0.818746	0.235873	3.47113	0.000518274	0.0304015	Lhpp	-78028
chr4_46116615_46117116	61.9965	-1.22491	0.352986	-3.47014	0.000520181	0.0304721	Tstd2	21360
chr4_104368671_104369172	91.1394	0.841749	0.242622	3.46938	0.000521665	0.0305177	Dab1	-1082
chr1_131310406_131310907	59.7934	-1.21977	0.35177	-3.46752	0.000525286	0.0306671	Srgap2	216441
chr14_121112154_121112655	35.6423	1.34241	0.387159	3.46734	0.000525633	0.0306671	Farp1	-76591
chr12_112683264_112683765	73.0336	0.931149	0.268578	3.46697	0.000526369	0.0306688	Zbtb42	-4437
chr6_112929938_112930439	98.8689	0.793462	0.229008	3.46477	0.000530679	0.0308784	Srgap3	16828
chr2_18217841_18218342	67.8062	-1.15707	0.334059	-3.46368	0.000532836	0.0309318	Dnajc1	174489
chr4_132938145_132938646	89.3225	-0.860544	0.248455	-3.46359	0.000533025	0.0309318	Fam76a	-15587
chr7_28367795_28368296	64.2039	0.96153	0.277742	3.46195	0.000536282	0.0310792	Plekhg2	4199
chr1_92634947_92635448	115.406	0.882506	0.255094	3.45953	0.000541116	0.0313021	Cops9	6538
chr5_74252768_74253269	88.7307	-1.07593	0.311026	-3.45931	0.000541571	0.0313021	Scfd2	278491
chr15_81926043_81926544	298.437	0.549898	0.158983	3.45885	0.000542496	0.0313031	Polr3h	0
chr5_53161445_53161946	58.2366	-1.10617	0.319867	-3.45822	0.000543755	0.0313031	Sel1l3	51507
chr8_122281699_122282200	355.926	0.469712	0.135819	3.45837	0.000543458	0.0313031	AC114005.5	-2370859
chr8_122281699_122282200.1	355.926	0.469712	0.135819	3.45837	0.000543458	0.0313031	Zfpm1	0
chr12_100990231_100990732	41.7051	-1.38305	0.400221	-3.45571	0.000548842	0.031554	Ccdc88c	38325
chr11_117056923_117057424	83.4095	0.900527	0.26072	3.45399	0.000552348	0.0316687	Sec14l1	57748
chr15_8851028_8851529	46.3432	1.24937	0.361753	3.45366	0.000553028	0.0316687	Ranbp3l	116897
chr5_25613867_25614368	207.036	0.623112	0.180411	3.45384	0.000552671	0.0316687	Xrcc2	91458
chr6_91147089_91147590	45.8978	-1.2553	0.363643	-3.45202	0.000556411	0.0318204	Hdac11	9075
chr8_21981820_21982321	45.8996	-1.38284	0.400664	-3.45137	0.000557748	0.0318548	Ccdc70	-12046
chr14_60529957_60530458	111.053	0.818281	0.23716	3.45034	0.000559882	0.0319127	Spata13	103785
chr6_115968759_115969260	43.2722	-1.46792	0.425462	-3.45017	0.000560234	0.0319127	Plxnd1	25746
chr15_77815787_77816288	75.7999	0.918876	0.266375	3.44955	0.000561516	0.0319438	Myh9	25888
chr17_25957630_25958131	55.9602	-1.18534	0.343734	-3.44843	0.000563858	0.032035	D630044L22Rik	-6159
chr12_29868182_29868683	67.2586	0.920683	0.267044	3.44768	0.000565414	0.0320813	Myt1l	-339799
chr11_97309325_97309826	30.5321	1.38117	0.400685	3.44702	0.000566801	0.032118	Mrpl45	5890
chr5_33438116_33438617	78.4377	0.891044	0.258545	3.44638	0.000568141	0.0321519	Nkx1-1	-4140
chr7_74198698_74199199	68.5213	1.06078	0.307834	3.44595	0.000569058	0.0321618	St8sia2	-185024
chr1_172203044_172203545	64.4141	0.941334	0.273274	3.44466	0.00057178	0.0322316	Pea15a	3260
chr17_54201705_54202206	41.4281	-1.44273	0.418799	-3.44491	0.000571242	0.0322316	Slc5a7	96829
chr8_110956691_110957192	38.8545	-1.27044	0.368886	-3.44399	0.000573205	0.03227	St3gal2	-36770
chr2_166650421_166650922	99.8934	0.804214	0.233567	3.44319	0.000574902	0.0323235	Prex1	62911
chr3_158559882_158560383	37.72	-1.39915	0.406448	-3.44238	0.000576629	0.0323786	Lrrc7	1839
chr11_45472115_45472616	46.673	-1.32903	0.386205	-3.44125	0.000579038	0.0324718	Clint1	379435
chr16_4648601_4649102	38.1773	-1.3017	0.378314	-3.44079	0.000580011	0.0324844	Vasn	-8661
chr6_113480966_113481467	45.168	1.19187	0.346499	3.43974	0.000582272	0.0324851	Il17rc	-9540
chr7_143064267_143064768	176.038	0.676257	0.19658	3.44012	0.000581456	0.0324851	Cd81	-11529
chr8_122296119_122296620	52.8807	-1.22325	0.355614	-3.43984	0.000582057	0.0324851	AC114005.5	-2385279
chr8_122296119_122296620.1	52.8807	-1.22325	0.355614	-3.43984	0.000582057	0.0324851	Zfpm1	-13979
chr11_100397636_100398137	332.017	0.526604	0.153188	3.43762	0.000586845	0.0324969	Jup	0
chr18_5207590_5208091	116.838	0.867004	0.252106	3.43904	0.000583771	0.0324969	Zfp438	126349
chr19_4282988_4283489	222.763	0.60773	0.176789	3.4376	0.000586887	0.0324969	Ankrd13d	0
chr5_149143974_149144475	52.1048	1.11108	0.323208	3.43766	0.00058677	0.0324969	Uspl1	40192
chr8_117198069_117198570	124.005	0.817758	0.237889	3.43756	0.000586982	0.0324969	Gan	-39935
chr8_125419323_125419824	34.6322	-1.48349	0.43152	-3.43782	0.000586416	0.0324969	Sipa1l2	149985
chr2_72781587_72782088	51.1695	-1.15463	0.335931	-3.4371	0.000587971	0.0325102	Sp3	198359
chr12_77501426_77501927	37.772	-1.3943	0.405822	-3.43575	0.000590918	0.0325492	Fut8	-263302
chr13_104742771_104743272	43.6537	3.39415	0.987894	3.43574	0.00059093	0.0325492	Cwc27	73682
chr7_45017515_45018016	251.419	0.592008	0.172288	3.43615	0.000590045	0.0325492	Rras	0
chr6_28867832_28868333	45.7453	-1.16867	0.340346	-3.43376	0.000595261	0.0326632	Snd1	-387485
chr6_88841800_88842301	587.906	0.453221	0.131988	3.43379	0.000595203	0.0326632	Abtb1	0
chr9_70942587_70943088	44.6178	1.15325	0.335809	3.43424	0.000594223	0.0326632	Lipc	9139
chr12_26351286_26351787	92.6816	0.931914	0.271488	3.43262	0.00059778	0.03276	Rnf144a	63468
chr15_8706001_8706502	63.9192	1.13598	0.331009	3.43186	0.000599465	0.032786	Slc1a3	3908
chr5_125134735_125135236	242.31	0.580194	0.169068	3.43172	0.000599767	0.032786	Ncor2	43984
chr7_64509849_64510350	41.9245	-1.3121	0.382445	-3.43081	0.000601771	0.0328541	Apba2	-8144
chr14_20775686_20776187	37.4293	1.36052	0.396661	3.42992	0.000603749	0.0329206	Camk2g	17902
chr1_39772352_39772853	198.246	-0.67688	0.197408	-3.42884	0.000606162	0.0330107	RP23-469H11.2	32480
chr15_59480396_59480897	42.4019	1.25458	0.366004	3.42779	0.00060851	0.033097	Nsmce2	-106150
chr19_23940563_23941064	73.8814	0.990256	0.289028	3.42615	0.000612194	0.0331033	Apba1	-181688
chr3_10891948_10892449	30.0213	-1.73178	0.505447	-3.42624	0.000612003	0.0331033	Snx16	-451846
chr4_62605769_62606270	44.9145	-1.20596	0.351998	-3.42604	0.000612444	0.0331033	Rgs3	-45923
chr6_143166859_143167360	476.398	0.495868	0.144693	3.42704	0.000610201	0.0331033	Etnk1	0
chr8_86438573_86439074	139.217	0.790813	0.230778	3.42673	0.000610888	0.0331033	Abcc12	141613
chr11_106272765_106273266	289.444	0.540963	0.158013	3.42355	0.000618098	0.0333673	Smarcd2	0
chr10_5203842_5204343	64.8437	-1.06384	0.310808	-3.42281	0.00061977	0.0333901	Syne1	346350
chr3_108196952_108197453	58.7818	-1.01248	0.295814	-3.42268	0.00062006	0.0333901	Cyb561d1	3382
chr16_88679090_88679591	32.4794	-1.54687	0.452066	-3.42177	0.000622157	0.0334614	Krtap27-1	-7419
chr2_113828774_113829275	102.171	-0.888505	0.259772	-3.42033	0.000625444	0.0335549	Scg5	0
chr5_122693386_122693887	109.657	0.847963	0.247908	3.42048	0.000625112	0.0335549	P2rx4	13657
chr1_92030450_92030951	45.9601	1.19021	0.348145	3.41871	0.000629194	0.0335906	Hdac4	149391
chr5_123607101_123607602	106.433	0.913189	0.26704	3.41967	0.00062698	0.0335906	Clip1	77017
chr6_99968885_99969386	164.856	-0.714362	0.208957	-3.4187	0.000629208	0.0335906	Prok2	-242493
chr8_92407957_92408458	84.078	0.896121	0.262122	3.41872	0.000629171	0.0335906	Irx5	-50333
chr8_122752334_122752835	43.3359	-1.21714	0.356211	-3.4169	0.000633391	0.0337723	AC114005.5	-2841494
chr14_106075334_106075835	43.8152	-1.45902	0.427149	-3.4157	0.000636174	0.033879	Trim52	30363
chr11_88288985_88289486	51.428	-1.25428	0.367291	-3.41494	0.00063796	0.0339324	Ccdc182	4572
chr15_68101919_68102420	37.6398	-1.38452	0.405568	-3.41379	0.000640664	0.0340345	Zfat	156437
chr9_21407898_21408399	82.3569	0.828931	0.242948	3.41196	0.000644972	0.0342214	Qtrt1	3438
chr7_49183697_49184198	50.5379	-1.10366	0.323715	-3.40938	0.000651117	0.0345052	Nav2	-224601
chr4_149990086_149990587	94.3158	-0.885312	0.259726	-3.40864	0.000652869	0.0345466	H6pd	18437
chr9_62520139_62520640	49.316	1.05706	0.310134	3.40838	0.000653492	0.0345466	Coro2b	16405
chr1_133267909_133268410	110.342	0.856901	0.251478	3.40747	0.000655692	0.0346161	Plekha6	-86589
chr13_15298282_15298783	49.8755	1.21031	0.355283	3.40662	0.000657734	0.0346161	Gli3	164468
chr14_66307039_66307540	110.765	0.797489	0.234079	3.40693	0.000656986	0.0346161	Trim35	-10009
chr15_77037679_77038180	60.2427	1.05937	0.311037	3.40592	0.00065941	0.0346161	Mb	12491
chr17_25561547_25562048	144.79	0.718412	0.21095	3.40561	0.000660172	0.0346161	Sox8	8639
chr19_17769579_17770080	33.3748	-1.4239	0.418115	-3.40551	0.000660396	0.0346161	Pcsk5	67553
chr2_92353307_92353808	50.0965	1.09451	0.321374	3.40574	0.000659854	0.0346161	Phf21a	-169202
chr4_152209525_152210026	50.7011	1.17424	0.344853	3.40505	0.000661522	0.0346332	Acot7	-31392
chr4_136726944_136727445	57.1407	1.09551	0.321784	3.40448	0.000662907	0.0346639	Ephb2	108544
chr11_118327381_118327882	341.184	0.561829	0.165067	3.40364	0.000664941	0.0347283	Timp2	27625
chr11_76278882_76279383	49.8255	-1.22236	0.359251	-3.40251	0.000667687	0.0348298	Nxn	119758
chr11_44866414_44866915	42.6842	-1.26025	0.370502	-3.40145	0.000670293	0.0348498	Ebf1	-249098
chr14_26488315_26488816	72.8053	0.892956	0.262579	3.40072	0.00067209	0.0348498	Slmap	46116
chr7_118402566_118403067	33.0088	-1.43464	0.421785	-3.40137	0.000670501	0.0348498	Syt17	45156
chr7_137253800_137254301	59.5559	-1.10693	0.325399	-3.40177	0.000669515	0.0348498	Ebf3	60145
chr9_110249684_110250185	176.392	0.754161	0.221765	3.40073	0.000672071	0.0348498	Cspg5	-5902
chr2_84289006_84289507	180.424	1.08759	0.319971	3.39902	0.00067627	0.0350246	Calcrl	135905
chr13_113464307_113464808	51.4412	-1.14714	0.337631	-3.39762	0.00067974	0.0351623	Snx18	153757
chr14_8207034_8207535	50.2485	-1.29993	0.38265	-3.39718	0.000680838	0.0351772	Kctd6	6605
chr6_146446090_146446591	91.4076	0.935205	0.275337	3.39659	0.00068232	0.0352118	Itpr2	55588
chr12_84217512_84218013	133.401	0.873171	0.257159	3.39545	0.000685153	0.0353159	Elmsan1	-23497
chr8_108565992_108566493	42.3282	-1.35423	0.398998	-3.39407	0.000688623	0.0354526	Zfhx3	-623349
chr6_30572642_30573143	94.1615	0.842795	0.248364	3.39339	0.000690331	0.0354984	Cpa4	-4274
chr5_74155979_74156480	31.1004	-1.53506	0.452412	-3.39306	0.000691169	0.0354994	Rasl11b	38806
chr6_128764080_128764581	359.93	0.56963	0.167915	3.39238	0.000692882	0.0355452	Klrb1c	24061
chr4_135797837_135798338	66.172	1.01484	0.299425	3.38929	0.000700733	0.0358631	Myom3	-38123
chr6_99954834_99955335	95.6203	-0.859457	0.253563	-3.38953	0.000700137	0.0358631	Prok2	-228442
chr1_192557840_192558341	74.6362	-1.02075	0.301217	-3.38876	0.00070209	0.0358902	Hhat	212873
chr1_35879536_35880037	81.7173	0.940951	0.277768	3.38754	0.000705218	0.0359308	Hs6st1	188363
chr14_77639559_77640060	35.3162	-1.51293	0.446666	-3.38716	0.0007062	0.0359308	Enox1	-482797
chr15_8781058_8781559	196.245	1.04172	0.307465	3.3881	0.000703785	0.0359308	Slc1a3	-70649
chr3_88205716_88206217	226.398	0.715264	0.211154	3.38741	0.000705558	0.0359308	Rhbg	48493
chr18_34044620_34045121	30.2954	-1.44982	0.428116	-3.38651	0.000707882	0.035932	Epb41l4a	-37414
chr19_24308242_24308743	104.667	0.819318	0.241918	3.38676	0.000707227	0.035932	Pip5k1b	247130
chr4_82643388_82643889	95.9346	-0.879483	0.259779	-3.38551	0.00071047	0.0359838	Nfib	-137618
chr8_17465251_17465752	43.9976	-1.30398	0.385168	-3.38547	0.000710561	0.0359838	Csmd1	69530
chr14_57730155_57730656	165.533	0.764639	0.225907	3.38475	0.000712425	0.0360361	Lats2	3645
chr14_57730155_57730656.1	165.533	0.764639	0.225907	3.38475	0.000712425	0.0360361	RP24-92H14.4	15448
chr7_73618344_73618845	329.885	0.534444	0.157942	3.38381	0.000714876	0.0361179	Chd2	-76598
chr2_55818095_55818596	42.7674	-1.39866	0.413428	-3.38308	0.000716773	0.0361716	Kcnj3	-382126
chr1_9649155_9649656	162.729	-0.691208	0.20442	-3.38132	0.000721385	0.0362638	AC103620.3	-47957
chr1_166926071_166926572	65.0534	1.08255	0.320177	3.38111	0.000721946	0.0362638	Fam78b	74894
chr15_100910233_100910734	58.9944	0.964728	0.285315	3.38127	0.000721512	0.0362638	Scn8a	-39330
chr2_102657635_102658136	29.832	-1.46823	0.434236	-3.38118	0.000721759	0.0362638	Slc1a2	523
chr12_32724466_32724967	62.007	1.04023	0.307729	3.38036	0.000723919	0.0362788	Mampt	95368
chr19_42256893_42257394	54.1045	1.09781	0.324738	3.38061	0.00072326	0.0362788	Golga7b	-9320
chr1_194161034_194161535	38.0791	-1.36995	0.405546	-3.37805	0.000730008	0.036397	Plxna2	458290
chr13_28845552_28846053	75.7782	0.967412	0.286341	3.37853	0.000728743	0.036397	Sox4	107661
chr5_68149874_68150375	41.5688	-1.34503	0.398151	-3.3782	0.000729618	0.036397	Grxcr1	-118040
chr6_92497214_92497715	53.1683	-1.15575	0.342151	-3.37788	0.000730475	0.036397	Prickle2	208441
chr7_46718481_46718982	93.1673	-0.932659	0.27606	-3.37847	0.000728909	0.036397	Saa3	-2781
chr6_16956966_16957467	50.8867	-1.21258	0.359178	-3.37599	0.000735497	0.0366051	Tfec	-58525
chr10_79930702_79931203	34.0016	-1.45293	0.430667	-3.37367	0.000741735	0.0366213	Arid3a	-3660
chr14_55518866_55519367	110.978	-0.925422	0.274168	-3.37538	0.000737128	0.0366213	Nrl	5615
chr2_90864145_90864646	31.5296	1.43888	0.426477	3.37388	0.000741171	0.0366213	Mtch2	-16991
chr2_135562405_135562906	56.681	1.04627	0.310014	3.37489	0.000738441	0.0366213	Plcb4	178924
chr4_148974809_148975310	75.5244	-0.986606	0.292407	-3.37408	0.000740615	0.0366213	Pex14	124567
chr5_123435776_123436277	34.2267	1.27585	0.378143	3.37399	0.000740879	0.0366213	Mlxip	-40979
chr8_33078065_33078566	38.6009	1.43564	0.425431	3.37456	0.000739328	0.0366213	Nrg1	-194036
chr1_135770828_135771329	36.6936	1.21968	0.361643	3.3726	0.000744622	0.0366833	Phlda3	-4710
chr13_94169296_94169797	64.177	1.07729	0.319425	3.37258	0.000744684	0.0366833	Lhfpl2	-111501
chr1_73758561_73759062	30.5226	-1.39914	0.414996	-3.37146	0.000747701	0.0367068	Tns1	365388
chr12_86790566_86791067	47.564	1.1122	0.329863	3.3717	0.000747056	0.0367068	Lrrc74a	-56198
chr19_46422440_46422941	149.817	-0.748181	0.221879	-3.37202	0.000746187	0.0367068	Sufu	-25545
chr11_35877677_35878178	38.2787	-1.38303	0.410405	-3.36991	0.000751923	0.0368306	Wwc1	102350
chr17_32179967_32180468	108.87	0.886543	0.263065	3.37006	0.000751529	0.0368306	Ephx3	9082
chr5_78584822_78585323	89.2054	-0.877419	0.260433	-3.36908	0.000754205	0.0368869	Igfbp7	-1176781
chr7_118976599_118977100	95.1032	0.796676	0.236482	3.36887	0.000754774	0.0368869	Gprc5b	18112
chr2_38137045_38137546	69.6903	-1.04829	0.311371	-3.36668	0.000760781	0.0371386	Dennd1a	149830
chr4_131520626_131521127	66.7591	1.10301	0.327834	3.36454	0.000766723	0.0373866	Ptpru	317162
chr11_107027846_107028347	182.331	0.609454	0.181219	3.36309	0.000770761	0.0375413	RP23-317F9.2	-2166
chr6_29195781_29196282	109.904	0.787918	0.234394	3.36151	0.000775182	0.0377142	Prrt4	-16197
chr7_35668115_35668616	75.897	0.95135	0.283076	3.36075	0.000777305	0.0377751	Pdcd5	-20594
chr10_121423745_121424246	146.496	-0.708742	0.210939	-3.35994	0.000779605	0.0377861	Rassf3	52102
chr13_43112239_43112740	92.9163	-0.962987	0.286643	-3.35954	0.000780732	0.0377861	Phactr1	-431617
chr17_90086763_90087264	89.1774	-1.0418	0.31011	-3.35944	0.000781017	0.0377861	Nrxn1	1005808
chr4_148122254_148122755	201.067	-0.675398	0.200994	-3.36028	0.000778622	0.0377861	Draxin	7944
chr1_62591566_62592067	30.3363	-1.52238	0.453459	-3.35727	0.000787175	0.037999	Pard3b	-952743
chr1_106071916_106072417	70.2619	-1.11	0.330671	-3.35681	0.000788471	0.037999	Zcchc2	-81511
chr12_108792656_108793157	385.094	0.452588	0.134812	3.35718	0.000787409	0.037999	Yy1	0
chr7_64862967_64863468	70.3361	1.05027	0.312893	3.35665	0.000788925	0.037999	Fam189a1	293103
chr10_57784516_57785017	146.143	0.68684	0.204761	3.35434	0.000795532	0.0381056	Fabp7	0
chr10_64039596_64040097	34.8841	-1.38391	0.412527	-3.35472	0.000794451	0.0381056	Ctnna3	-609499
chr10_64039596_64040097.1	34.8841	-1.38391	0.412527	-3.35472	0.000794451	0.0381056	Lrrtm3	50178
chr5_117841735_117842236	59.8421	-1.03338	0.308004	-3.35507	0.000793444	0.0381056	Nos1	0
chr6_72253938_72254439	56.7247	-1.05286	0.313859	-3.35456	0.000794922	0.0381056	Atoh8	-18361
chr8_3682289_3682790	44.2775	-1.40177	0.417821	-3.35496	0.000793752	0.0381056	Fcer2a	11386
chr11_113135207_113135708	39.9019	1.30164	0.38829	3.35222	0.000801653	0.0382719	Sox9	-352984
chr12_112329669_112330170	110.118	0.769477	0.229512	3.35267	0.000800369	0.0382719	RP23-383E9.1	159278
chr18_42578891_42579392	64.4024	-0.996309	0.297198	-3.35234	0.000801313	0.0382719	Gpr151	261
chr14_67205133_67205634	48.1864	1.12997	0.337257	3.35048	0.000806727	0.0384114	Ebf2	27658
chr17_15247816_15248317	196.352	-0.646551	0.192978	-3.35038	0.000806998	0.0384114	Dll1	127660
chr18_34247835_34248336	146.501	0.726011	0.216718	3.35003	0.000808041	0.0384114	Apc	-26852
chr8_122676979_122677480	94.9324	-0.788032	0.235234	-3.35	0.00080812	0.0384114	AC114005.5	-2766139
chr8_122676979_122677480.1	94.9324	-0.788032	0.235234	-3.35	0.00080812	0.0384114	Cbfa2t3	21630
chr5_137349878_137350379	134.521	0.67434	0.201341	3.34924	0.000810328	0.0384742	Ephb4	0
chr15_72891935_72892436	110.835	0.833541	0.248954	3.34817	0.000813476	0.0385813	Trappc9	168769
chr5_140725923_140726424	112.196	0.752001	0.224632	3.3477	0.000814863	0.0386049	Amz1	-1797
chr11_119784794_119785295	93.17	0.863086	0.257877	3.34689	0.000817239	0.0386386	Rptor	-181646
chr4_140218365_140218866	91.3452	0.797881	0.238398	3.34685	0.000817357	0.0386386	Igsf21	27919
chr4_63744736_63745237	48.9924	-1.15115	0.344082	-3.34555	0.000821191	0.0387776	Tnfsf15	0
chr19_4988947_4989448	61.9487	0.907949	0.271437	3.34497	0.000822904	0.0388162	Npas4	524
chr14_54686529_54687030	454.824	0.484155	0.144781	3.34405	0.000825638	0.0389028	Acin1	0
chr14_54686529_54687030.1	454.824	0.484155	0.144781	3.34405	0.000825638	0.0389028	RP23-94B13.9	-314
chr18_23521928_23522429	154.514	0.784473	0.234675	3.3428	0.000829372	0.0390363	Dtna	-106487
chr8_102507677_102508178	42.2933	1.34108	0.401337	3.34154	0.000833154	0.0391718	Cdh11	277465
chr14_104688438_104688939	48.3274	-1.2565	0.376212	-3.33987	0.000838178	0.0393227	Rnf219	-165793
chr9_120739219_120739720	79.7051	0.918954	0.275143	3.33991	0.000838053	0.0393227	Rpl14	-167776
chr14_45364771_45365272	148.268	-0.69659	0.208624	-3.33898	0.000840866	0.0394061	Styx	-13679
chr11_88471881_88472382	106.637	0.821977	0.24627	3.33771	0.000844727	0.0394592	Ccdc182	-177824
chr8_120151184_120151685	41.8707	-1.18326	0.354502	-3.33782	0.000844383	0.0394592	AC114005.5	-240344
chr8_120151184_120151685.1	41.8707	-1.18326	0.354502	-3.33782	0.000844383	0.0394592	AC163442.1	-37033
chr8_120644581_120645082	121.106	0.742514	0.222459	3.33776	0.000844569	0.0394592	AC103360.3	2551
chr8_120644581_120645082.1	121.106	0.742514	0.222459	3.33776	0.000844569	0.0394592	AC114005.5	-733741
chr8_120644581_120645082.2	121.106	0.742514	0.222459	3.33776	0.000844569	0.0394592	RP24-414A22.6	22998
chr16_77400430_77400931	152.881	0.749841	0.224682	3.33735	0.000845817	0.0394675	Gm11146	201164
chr19_40366405_40366906	103.005	0.809319	0.24261	3.33588	0.000850294	0.0396338	Sorbs1	146845
chr15_37499160_37499661	60.0039	0.981968	0.294392	3.33558	0.000851212	0.0396339	Ncald	292773
chr11_55428195_55428696	122.055	0.805184	0.241454	3.33473	0.000853822	0.0396862	Sparc	-5012
chr13_110139281_110139782	69.0447	-1.04661	0.313863	-3.33462	0.000854166	0.0396862	Rab3c	141120
chr10_19464574_19465075	38.8906	1.33975	0.401828	3.33414	0.000855633	0.0397118	Olig3	-108042
chr5_5372328_5372829	36.8029	-1.29289	0.387909	-3.33298	0.000859203	0.0398349	Cdk14	7369
chr16_85092666_85093167	43.9882	-1.21008	0.363255	-3.33122	0.000864658	0.0399845	App	80600
chr7_64645854_64646355	46.7013	1.10069	0.330399	3.3314	0.000864108	0.0399845	Apba2	-144149
chr8_114306255_114306756	48.3682	-1.19196	0.357835	-3.33105	0.000865197	0.0399845	Vat1l	-100626
chr11_55418021_55418522	61.7001	0.962998	0.289221	3.32962	0.000869637	0.040144	Sparc	4662
chr13_37934891_37935392	39.6593	1.31481	0.394917	3.32934	0.00087052	0.040144	Rreb1	-108854
chr2_38539617_38540118	81.5665	-0.983636	0.295471	-3.32905	0.000871427	0.040144	Nek6	-27975
chr3_87073091_87073592	37.3156	1.27914	0.384291	3.32857	0.000872915	0.0401699	Cd1d1	-73650
chr17_9759492_9759993	96.4292	0.886932	0.266485	3.32826	0.000873902	0.0401726	Pabpc6	-89788
chr5_85346663_85347164	53.1044	-1.25468	0.377062	-3.32753	0.000876198	0.0402355	Cenpc1	718420
chr18_54952433_54952934	147.246	-0.696861	0.209461	-3.32692	0.0008781	0.0402802	Zfp608	37247
chr18_46341515_46342016	42.1435	1.13963	0.342659	3.32584	0.000881535	0.040395	Ccdc112	-29587
chr1_188077584_188078085	40.3217	-1.25129	0.37635	-3.3248	0.000884814	0.0405024	Esrrg	-79717
chr8_11452909_11453410	48.2586	1.13955	0.342854	3.32372	0.000888261	0.0406173	Rab20	25301
chr2_179842995_179843496	112.481	0.765234	0.230264	3.3233	0.000889601	0.0406357	Cdh4	-400565
chr2_32586768_32587269	158.301	0.615948	0.185368	3.32284	0.000891049	0.040659	St6galnac4	0
chr19_4169332_4169833	394.11	0.448055	0.134874	3.32204	0.000893624	0.0407337	Carns1	5647
chr12_8434242_8434743	57.1349	-1.15655	0.348291	-3.32064	0.000898128	0.0408744	Rhob	65267
chr5_66393113_66393614	65.6492	0.935022	0.281592	3.32049	0.000898598	0.0408744	Apbb2	225171
chr2_69531604_69532105	35.9316	1.29551	0.390193	3.32019	0.000899576	0.040876	Lrp2	53961
chr11_68215185_68215686	138.028	0.727647	0.219276	3.31841	0.000905316	0.0410079	Ntn1	185138
chr2_32914791_32915292	131.512	0.767967	0.231417	3.31854	0.000904902	0.0410079	Fam129b	-38678
chr5_142950355_142950856	65.7421	-0.985822	0.297039	-3.31883	0.00090396	0.0410079	Fscn1	9487
chr5_22486750_22487251	73.7334	-1.06497	0.321002	-3.31763	0.000907847	0.0410796	Orc5	63125
chr9_27475476_27475977	33.4745	-1.4783	0.445709	-3.31674	0.000910744	0.0411677	Spata19	-78677
chr4_45740937_45741438	68.7667	-0.993766	0.299683	-3.31605	0.000912986	0.0412261	Aldh1b1	57584
chr1_64305379_64305880	137.324	0.676189	0.204024	3.31426	0.000918858	0.0412762	Klf7	-183888
chr1_90974881_90975382	172.838	0.747801	0.225577	3.31505	0.00091626	0.0412762	Rab17	-5220
chr1_135741073_135741574	76.9298	-0.88187	0.266062	-3.31453	0.000917985	0.0412762	Csrp1	-21013
chr16_23568494_23568995	60.3253	-0.985518	0.297344	-3.3144	0.000918399	0.0412762	Rtp4	-48204
chr4_129987717_129988218	68.1796	0.866992	0.261532	3.31505	0.000916264	0.0412762	Adgrb2	-2848
chr4_152996572_152997073	53.4517	1.10217	0.332702	3.31277	0.000923756	0.0414533	Ajap1	485739
chr12_80344699_80345200	56.7672	1.03522	0.312555	3.31213	0.000925887	0.041506	Dcaf5	91402
chr8_95324605_95325106	74.617	0.961803	0.290499	3.31087	0.000930072	0.0416505	Zfp319	6845
chr1_34666289_34666790	181.096	0.683228	0.206409	3.31007	0.000932715	0.0417053	Arhgef4	11398
chr1_126454696_126455197	44.6369	-1.22712	0.370741	-3.30992	0.000933221	0.0417053	Nckap5	37731
chr10_61965444_61965945	63.7196	-0.948386	0.286595	-3.30916	0.000935777	0.0417765	Col13a1	13164
chr11_88252847_88253348	68.3226	-0.960277	0.2903	-3.30788	0.000940052	0.0418381	Ccdc182	40710
chr3_37882438_37882939	117.077	0.823241	0.248832	3.30842	0.000938228	0.0418381	AC110508.1	-157948
chr3_101653392_101653893	35.9622	-1.32913	0.401789	-3.30803	0.000939547	0.0418381	Atp1a1	-48708
chr4_62978547_62979048	37.0596	-1.24216	0.375625	-3.30691	0.000943304	0.0419398	Zfp618	-12975
chr1_192380500_192381001	71.8416	-0.9801	0.296575	-3.30473	0.00095069	0.0422249	Kcnh1	-189727
chr1_172060620_172061121	40.5348	-1.3807	0.417915	-3.30377	0.00095394	0.0423258	Nhlh1	-3047
chr14_27810758_27811259	35.2679	1.20043	0.363434	3.30303	0.00095646	0.0423942	Erc2	-188331
chr7_46316889_46317390	74.1691	-1.08894	0.329805	-3.30177	0.000960775	0.042542	Myod1	59084
chr11_78152240_78152741	159.678	0.692432	0.20982	3.30013	0.000966399	0.0426187	Fam222b	-57581
chr15_52413152_52413653	102.667	-0.932967	0.28279	-3.29915	0.00096977	0.0426187	Slc30a8	-117600
chr17_26045326_26045827	64.8559	1.0763	0.326125	3.30027	0.000965911	0.0426187	Rab11fip3	23583
chr2_53436986_53437487	33.677	-1.38922	0.420948	-3.30021	0.00096611	0.0426187	Arl6ip6	-244899
chr2_153045830_153046331	48.421	-1.18361	0.358721	-3.29952	0.000968504	0.0426187	Xkr7	-13979
chr2_167299261_167299762	53.6619	-1.14685	0.347624	-3.2991	0.000969945	0.0426187	B4galt5	49422
chr6_43333433_43333934	39.3878	-1.27056	0.385138	-3.29898	0.000970373	0.0426187	Nobox	-23879
chr8_14763026_14763527	123.742	-0.716189	0.217025	-3.30003	0.000966731	0.0426187	Dlgap2	-667162
chr11_113656533_113657034	183.241	0.667181	0.202318	3.29769	0.000974825	0.0426222	Cog1	-7365
chr12_3405607_3406108	44.3906	1.13785	0.34506	3.29754	0.000975368	0.0426222	Kif3c	-40476
chr14_25765030_25765531	47.2078	1.04361	0.316472	3.29764	0.00097501	0.0426222	Zcchc24	3509
chr6_81660659_81661160	113.96	0.814123	0.246815	3.29851	0.00097199	0.0426222	Gcfc2	262509
chr8_120971989_120972490	83.3382	0.847838	0.257076	3.29801	0.000973743	0.0426222	AC114005.5	-1061149
chr13_55511037_55511538	63.6631	1.08632	0.329565	3.29622	0.000979969	0.0426942	Pdlim7	1909
chr17_49539126_49539627	182.049	0.652861	0.198034	3.29671	0.000978261	0.0426942	Daam2	24717
chrX_168429727_168430228	37.953	-1.43051	0.433955	-3.29644	0.000979183	0.0426942	Frmpd4	147004
chr4_106955682_106956183	67.9265	-1.07691	0.32693	-3.294	0.000987716	0.0429884	Ssbp3	-44213
chr1_28214195_28214696	53.6055	-1.20876	0.367071	-3.29297	0.000991348	0.0431033	Gm597	565557
chr7_144278723_144279224	38.4312	-1.38416	0.420385	-3.2926	0.000992662	0.0431171	Shank2	-276796
chr18_5427679_5428180	227.274	-0.636278	0.193267	-3.29222	0.000993994	0.0431318	Zfp438	-93240
chr2_146045299_146045800	105.504	-1.27657	0.387876	-3.29117	0.000997705	0.0432495	Crnkl1	-110285
chr17_75534412_75534913	30.227	-1.63824	0.498451	-3.28666	0.00101385	0.0439054	Fam98a	17034
chr1_121478541_121479042	42.8622	-1.19501	0.363651	-3.28615	0.00101566	0.0439353	Ccdc93	-47493
chr13_43733027_43733528	49.5102	-1.12633	0.342776	-3.2859	0.00101656	0.0439353	Cd83	51247
chr5_125221840_125222341	205.844	0.606279	0.18454	3.28534	0.00101858	0.0439784	Ncor2	-42621
chr15_78709750_78710251	179.589	0.626461	0.190703	3.28501	0.00101979	0.0439868	Elfn2	8521
chr2_130632863_130633364	38.6271	1.24693	0.379741	3.28365	0.00102473	0.044111	Lzts3	4732
chr9_101733786_101734287	55.2972	-1.14591	0.349003	-3.28338	0.00102572	0.044111	RP24-364K10.1	204194
chr9_124422834_124423335	370.362	0.480694	0.146386	3.28374	0.0010244	0.044111	Ppp2r3d	820
chr7_81455218_81455719	74.3562	0.849636	0.258831	3.28259	0.00102858	0.0441903	Cpeb1	-460
chr4_149876722_149877223	41.4016	-1.24702	0.379945	-3.2821	0.00103037	0.0442232	Spsb1	77821
chr4_98004195_98004696	157.316	0.740691	0.225782	3.28055	0.00103603	0.0444222	Nfia	-226588
chr2_158840817_158841318	49.5485	1.02933	0.313841	3.27978	0.00103887	0.0444999	Dhx35	-46011
chr3_37729077_37729578	48.6401	1.08267	0.330163	3.2792	0.001041	0.0445033	AC110508.1	-4587
chr5_27424465_27424966	34.5428	-1.3398	0.408572	-3.27923	0.00104093	0.0445033	Dpp6	-607109
chr12_90915851_90916352	113.481	0.846779	0.258262	3.27876	0.00104265	0.0445299	Dio2	-177413
chr8_12268235_12268736	63.335	-0.987928	0.301341	-3.27844	0.00104384	0.044537	A230072I06Rik	10083
chr12_26802504_26803005	48.9831	-1.13685	0.346797	-3.27813	0.00104497	0.0445412	Cmpk2	-333301
chr19_56999758_57000259	156.447	0.786325	0.23997	3.27677	0.00105002	0.0447126	Afap1l2	7970
chr11_104155215_104155716	68.3062	-1.02328	0.312378	-3.27579	0.00105368	0.0448245	Crhr1	-22361
chr9_71897366_71897867	52.0295	1.03828	0.317075	3.27455	0.0010583	0.0449768	Tcf12	214005
chr12_80379851_80380352	183.483	0.660175	0.201647	3.27391	0.00106071	0.0450349	Dcaf5	56250
chr11_120572934_120573435	522.4	0.392901	0.120033	3.27328	0.00106308	0.0450446	P4hb	-93
chr12_12812766_12813267	59.2042	-1.09529	0.334642	-3.27302	0.00106405	0.0450446	Mycn	128648
chr4_93675664_93676165	47.5745	-1.35647	0.414415	-3.27321	0.00106334	0.0450446	Tusc1	-340153
chr18_6144705_6145206	37.9377	1.3007	0.397562	3.27169	0.00106908	0.0452131	Arhgap12	-8607
chr11_118752298_118752799	43.8143	-1.2391	0.378817	-3.27097	0.00107181	0.0452804	Rbfox3	158799
chr2_33130430_33130931	194.168	0.57503	0.175812	3.27072	0.00107276	0.0452804	Garnl3	506
chr19_46451996_46452497	83.2031	-0.868757	0.265667	-3.2701	0.00107511	0.0452913	Sufu	-55101
chr7_118766147_118766648	47.5095	-1.14055	0.348754	-3.27035	0.00107416	0.0452913	AC165086.3	-25922
chr14_64321926_64322427	62.879	-0.986825	0.301899	-3.26872	0.00108034	0.0453465	Msra	133477
chr17_10326660_10327161	140.569	0.771447	0.235967	3.26931	0.00107812	0.0453465	Qk	-7299
chr2_25004215_25004716	38.0442	1.24443	0.380666	3.2691	0.00107891	0.0453465	Pnpla7	-28183
chr5_149380447_149380948	84.9856	0.853312	0.261059	3.26865	0.0010806	0.0453465	Medag	30801
chr1_105002178_105002679	42.5522	-1.30458	0.399252	-3.26757	0.00108475	0.0454238	Cdh20	-233650
chr14_18228320_18228821	32.858	-1.46753	0.449104	-3.26769	0.00108428	0.0454238	Nr1d2	10307
chr17_9120262_9120763	34.5114	1.29186	0.395386	3.26735	0.00108559	0.0454238	RP23-67C3.2	-131930
chr12_31905579_31906080	119.743	-0.823195	0.252071	-3.26572	0.00109186	0.0454632	Cog5	-250711
chr12_112435678_112436179	89.2914	-0.876092	0.268255	-3.26589	0.0010912	0.0454632	RP23-383E9.1	53269
chr15_51720886_51721387	30.0289	-1.38448	0.423976	-3.26547	0.00109282	0.0454632	Eif3h	144137
chr15_103513435_103513936	42.8612	-1.33076	0.407471	-3.2659	0.00109118	0.0454632	Pde1b	-10402
chr4_87026699_87027200	71.7715	-0.956936	0.292987	-3.26614	0.00109024	0.0454632	Slc24a2	203278
chr5_9011344_9011845	30.3263	1.48265	0.454032	3.26552	0.00109261	0.0454632	Crot	-14020
chr13_41267826_41268327	151.832	1.01796	0.311783	3.26497	0.00109475	0.0454998	Smim13	-17983
chr13_92696394_92696895	38.1957	-1.40878	0.431608	-3.26402	0.00109844	0.0456094	Serinc5	-85304
chr10_118640084_118640585	45.8777	-1.20724	0.370069	-3.26221	0.00110549	0.0458259	Ifng	-199039
chr12_86181269_86181770	54.3727	-1.07589	0.32981	-3.26213	0.00110577	0.0458259	Gpatch2l	60088
chr1_128856870_128857371	51.3515	-1.16357	0.356725	-3.26182	0.00110699	0.0458326	Cxcr4	-264580
chr11_34276620_34277121	67.9413	0.958116	0.293906	3.25994	0.00111437	0.0459363	Dock2	506772
chr11_112988812_112989313	38.0027	1.18659	0.364003	3.25983	0.00111479	0.0459363	Sox9	-206589
chr13_6250986_6251487	54.5807	1.12293	0.344426	3.2603	0.00111294	0.0459363	Pitrm1	296662
chr17_11978278_11978779	102.844	-1.21279	0.371928	-3.26083	0.00111086	0.0459363	Park2	-1137895
chr18_33692120_33692621	92.4858	0.832546	0.255364	3.26023	0.00111322	0.0459363	Gm10549	-227958
chr9_65267642_65268143	61.5125	-0.985002	0.302238	-3.25903	0.00111794	0.0460226	Cilp	-2463
chr6_53371918_53372419	55.3662	-1.08734	0.333695	-3.25847	0.00112013	0.046069	Creb5	-84649
chr6_148406764_148407265	41.6729	-1.31314	0.403047	-3.25804	0.00112185	0.0460958	Tmtc1	37125
chr6_115123240_115123741	285.58	0.620621	0.190527	3.25739	0.00112443	0.0461579	Syn2	11176
chr14_65663961_65664462	47.9029	1.07161	0.329104	3.25614	0.00112939	0.0462372	Scara5	1941
chr15_76307110_76307611	76.276	0.859839	0.264046	3.2564	0.00112834	0.0462372	Oplah	-9
chr4_66215306_66215807	64.216	-1.04289	0.320289	-3.2561	0.00112956	0.0462372	Astn2	188677
chr19_46623032_46623533	86.0457	0.854109	0.262375	3.25529	0.00113276	0.0463005	Wbp1l	-23949
chr4_62275085_62275586	217.542	0.652999	0.200604	3.25517	0.00113326	0.0463005	Slc31a2	-12524
chr5_76762964_76763465	50.3287	-1.09063	0.335074	-3.2549	0.00113431	0.0463005	AC166328.1	-10597
chr6_142835631_142836132	116.348	0.825667	0.253741	3.25398	0.00113801	0.0464079	St8sia1	128321
chr4_130055912_130056413	93.8929	0.831055	0.255491	3.25277	0.00114285	0.0465613	Col16a1	-8073
chr11_48119823_48120324	78.0762	0.992608	0.305385	3.25034	0.00115265	0.0467949	Sgcd	-540858
chr11_114502148_114502649	45.6092	1.21619	0.374121	3.25079	0.00115086	0.0467949	Rpl38	165875
chr12_84190011_84190512	38.5762	1.24343	0.382594	3.25	0.00115407	0.0467949	Elmsan1	3504
chr17_67052914_67053415	70.206	0.899326	0.276694	3.25025	0.00115302	0.0467949	Ptprm	301043
chr7_19600508_19601009	163.767	0.751332	0.231208	3.24959	0.00115572	0.0467949	Clasrp	3478
chr7_139850154_139850655	117.345	0.766977	0.236035	3.24942	0.00115641	0.0467949	Adgra1	-15981
chr9_15732037_15732538	114.91	0.858419	0.264086	3.25053	0.00115192	0.0467949	Slc36a4	-22300
chr9_120001998_120002499	82.172	0.893291	0.274925	3.24922	0.00115722	0.0467949	Csrnp1	-17555
chr1_11458346_11458847	89.5512	-0.942319	0.290135	-3.24787	0.00116274	0.0469306	AC103635.1	-44242
chr6_100163074_100163575	373.448	-0.5688	0.175116	-3.24813	0.00116167	0.0469306	Rybp	123911
chr7_29465770_29466271	141.444	0.689773	0.212517	3.24573	0.00117149	0.0472399	Sipa1l3	39190
chr7_68264559_68265060	55.1505	-1.06292	0.327509	-3.24546	0.0011726	0.0472407	Pgpep1l	-326
chr15_64578958_64579459	34.7263	-1.34384	0.414167	-3.24467	0.00117587	0.0473283	Asap1	-196039
chr9_34558403_34558904	121.763	0.802199	0.247289	3.24398	0.00117873	0.0473996	Kirrel3	-69671
chr11_115956381_115956882	156.859	0.78506	0.242054	3.24333	0.00118141	0.0474194	Sap30bp	-23100
chr15_40124218_40124719	42.5088	-1.15882	0.357267	-3.24357	0.00118041	0.0474194	RP23-100K19.2	9646
chr15_83849513_83850014	38.9995	1.25943	0.388402	3.24261	0.00118441	0.0474958	Mpped1	-69532
chr10_66641025_66641526	42.7624	-1.16662	0.359862	-3.24185	0.00118757	0.0475786	Reep3	455420
chr7_16659056_16659557	45.4032	1.13517	0.350206	3.24145	0.00118923	0.0476011	Ceacam15	16149
chr6_143359211_143359712	83.639	-0.994733	0.30705	-3.23964	0.0011968	0.0478598	Etnk1	-191991
chr10_75720185_75720686	115.018	0.830166	0.256366	3.23821	0.00120281	0.0480241	Cabin1	43631
chr3_51156927_51157428	172.512	-0.667802	0.20623	-3.23814	0.00120313	0.0480241	Noct	67019
chr7_44553240_44553741	156.397	0.593786	0.183388	3.23788	0.00120423	0.0480241	Nr1h2	209
chr17_84535294_84535795	43.2597	1.10136	0.340192	3.23747	0.00120594	0.0480411	Plekhh2	-23400
chr6_83171093_83171594	37.2258	1.31171	0.405192	3.23725	0.00120687	0.0480411	Dctn1	-5174
chr16_24819064_24819565	63.8627	-0.982519	0.303634	-3.23587	0.00121274	0.048186	Lpp	-425715
chr5_64709096_64709597	36.4633	1.27585	0.394274	3.23595	0.0012124	0.048186	Klf3	93791
chr1_90278948_90279449	46.2652	1.14371	0.353683	3.23373	0.00122186	0.0484597	Ackr3	-74969
chr3_105617333_105617834	52.3587	-1.10041	0.340269	-3.23394	0.00122096	0.0484597	Kcnd3	-165004
chr16_38673473_38673974	299.84	0.605475	0.187263	3.23329	0.00122375	0.0484903	Arhgap31	39301
chr2_129686860_129687361	30.7166	-1.44602	0.447381	-3.23219	0.00122844	0.0485874	Pdyn	12473
chr4_43043907_43044408	337.063	0.589937	0.182506	3.23242	0.00122748	0.0485874	Fam214b	1813
chr11_107335666_107336167	118.307	0.736366	0.227862	3.23164	0.00123083	0.0486374	Pitpnc1	134533
chr7_96419958_96420459	65.196	-1.00901	0.312266	-3.23124	0.00123253	0.0486603	Tenm4	-248713
chr10_127614142_127614643	73.9235	0.823672	0.255036	3.22963	0.00123951	0.0487582	Lrp1	6506
chr17_56276642_56277143	141.483	0.663898	0.205532	3.23015	0.00123725	0.0487582	Ticam1	0
chr4_129702362_129702863	90.5871	0.770829	0.238664	3.22976	0.00123893	0.0487582	Tmem39b	-5524
chr7_83711792_83712293	43.0006	-1.24023	0.383979	-3.22994	0.00123816	0.0487582	Il16	23231
chr14_66956959_66957460	34.9591	-1.26137	0.390656	-3.22886	0.00124286	0.0488015	Pnma2	-45790
chr2_179762468_179762969	106.467	-0.816688	0.25292	-3.22904	0.00124207	0.0488015	Cdh4	-320038
chr10_5804721_5805222	44.3192	-1.16319	0.360312	-3.22828	0.00124536	0.048837	Fbxo5	379
chr11_108958378_108958879	58.8131	-1.00402	0.311022	-3.22813	0.00124602	0.048837	Axin2	-38030
chr7_44676552_44677053	66.3859	0.919405	0.285071	3.22518	0.00125892	0.049298	Myh14	-5709
chr4_132732298_132732799	123.759	0.687288	0.213134	3.22468	0.00126115	0.0493409	Xkr8	0
chr9_62122480_62122981	396.695	0.466702	0.144742	3.22436	0.00126254	0.0493508	Glce	0
chr14_37292399_37292900	36.4494	-1.3881	0.430562	-3.22392	0.00126447	0.0493816	Ghitm	-157147
chr19_28994866_28995367	125.791	0.841831	0.261164	3.22338	0.00126687	0.0494307	Cdc37l1	-4515
chr3_107424299_107424800	59.5626	1.0108	0.313717	3.222	0.001273	0.0496251	Kcnc4	34753
chr11_117923265_117923766	86.6097	0.77015	0.239201	3.21967	0.00128338	0.0498248	Socs3	45421
chr15_78624526_78625027	102.542	0.729797	0.226638	3.2201	0.00128144	0.0498248	Cyth4	-27480
chr3_54764396_54764897	139.854	0.741257	0.23022	3.21978	0.0012829	0.0498248	Smad9	-8815
chr3_101354537_101355038	64.1092	-1.03472	0.321386	-3.21956	0.00128387	0.0498248	Igsf3	22045
chr4_62583587_62584088	102.981	-0.875257	0.271791	-3.22033	0.00128045	0.0498248	Rgs3	-23741
chr13_112987431_112987932	308.053	0.492502	0.153083	3.21723	0.00129434	0.049963	Ccno	0
chr19_53259519_53260020	64.8218	-0.971673	0.301985	-3.21763	0.00129257	0.049963	Mxi1	50486
chr2_152080502_152081003	43.7681	-1.14824	0.356899	-3.21726	0.0012942	0.049963	Scrt2	526
chr4_148491686_148492187	31.0136	-1.5426	0.479459	-3.21738	0.00129367	0.049963	Mtor	-43076
chr7_3287146_3287647	39.7489	1.17457	0.364953	3.2184	0.00128907	0.049963	Myadm	1433
chr7_120102083_120102584	97.2327	-0.814308	0.253098	-3.21737	0.00129372	0.049963	Tmem159	0
chr2_4568956_4569457	83.815	1.00795	0.313415	3.21603	0.00129977	0.050128	Frmd4a	-551213
chr1_82150812_82151313	69.8734	0.971501	0.302275	3.21397	0.00130915	0.0502763	Gm9747	81799
chr1_151726401_151726902	67.141	1.08486	0.337585	3.21357	0.00131094	0.0502763	Edem3	28469
chr14_46989536_46990037	77.8477	0.882769	0.274816	3.21222	0.00131715	0.0502763	Samd4	-106683
chr14_49493800_49494301	31.6074	1.32661	0.41313	3.21112	0.00132219	0.0502763	Slc35f4	31746
chr14_65140120_65140621	160.855	0.679273	0.211345	3.21404	0.0013088	0.0502763	Extl3	-42015
chr15_8586878_8587379	31.2288	-1.34399	0.418637	-3.2104	0.00132551	0.0502763	Gm2310	-66925
chr16_59604442_59604943	79.9491	-0.967315	0.301053	-3.2131	0.00131308	0.0502763	Arl6	34449
chr18_86394632_86395133	61.7769	-0.996484	0.310214	-3.21224	0.00131702	0.0502763	Neto1	0
chr2_119301044_119301545	78.4301	-0.891324	0.277429	-3.2128	0.00131446	0.0502763	Vps18	-12303
chr5_32741398_32741899	91.2889	0.81145	0.252534	3.21324	0.00131248	0.0502763	Pisd	577
chr5_32741398_32741899.1	91.2889	0.81145	0.252534	3.21324	0.00131248	0.0502763	RP23-118L1.1	85211
chr5_109557755_109558256	95.3666	-0.84325	0.262503	-3.21234	0.0013166	0.0502763	Crlf2	738
chr5_124622833_124623334	56.5487	1.07934	0.336204	3.21037	0.00132565	0.0502763	Atp6v0a2	5718
chr5_141182363_141182864	30.802	-1.32339	0.412068	-3.21158	0.00132007	0.0502763	Sdk1	58626
chr7_136894233_136894734	185.094	0.555607	0.172976	3.21205	0.00131793	0.0502763	Mgmt	0
chr8_26993914_26994415	131.972	0.731985	0.227937	3.21135	0.00132114	0.0502763	Zfp703	-16590
chr9_40539689_40540190	130.34	0.765406	0.23819	3.21343	0.00131161	0.0502763	Gramd1b	-8306
chr9_50064739_50065240	130.184	0.716011	0.222956	3.21145	0.00132066	0.0502763	Ncam1	-265814
chr9_60972431_60972932	62.4162	-0.981832	0.305824	-3.21045	0.00132528	0.0502763	Uaca	-177890
chrX_152347010_152347511	55.1916	-1.21354	0.377559	-3.21418	0.00130817	0.0502763	Gpr173	21194
chr1_153593565_153594066	38.8859	1.18927	0.370565	3.20935	0.00133034	0.0503778	Npl	-43520
chr2_137101074_137101575	57.9539	-1.10771	0.345184	-3.20903	0.00133182	0.0503778	Jag1	15070
chr2_165493712_165494213	82.2006	0.813805	0.253585	3.2092	0.00133105	0.0503778	Trp53rka	-388
chr1_151167659_151168160	38.9878	1.16103	0.361997	3.2073	0.00133988	0.0506385	RP23-393I20.2	14377
chr7_16103144_16103645	32.3048	-1.31272	0.409386	-3.20657	0.00134326	0.0507222	Napa	-4687
chr2_78006166_78006667	31.3836	-3.92454	1.22401	-3.2063	0.00134452	0.0507255	Cwc22	-59791
chr13_37680846_37681347	49.244	-1.14709	0.357897	-3.20508	0.00135027	0.0508539	Rreb1	144691
chr15_42068146_42068647	64.6063	-0.987527	0.308098	-3.20524	0.00134951	0.0508539	Abra	-198426
chr7_83891816_83892317	404.093	0.474785	0.14816	3.20454	0.00135278	0.0508602	Mesdc2	0
chr7_110237835_110238336	45.5986	1.09668	0.342215	3.20467	0.00135219	0.0508602	Swap70	-16125
chr3_95502223_95502724	37.4301	1.3537	0.422496	3.20405	0.00135507	0.0509021	Ctsk	-2968
chr14_78678209_78678710	51.5889	1.11432	0.348096	3.20119	0.00136863	0.0511455	Dgkh	54067
chr15_85634432_85634933	621.079	0.399449	0.124759	3.20177	0.00136584	0.0511455	Wnt7b	-51959
chr2_4504448_4504949	87.1787	0.791741	0.247261	3.20205	0.00136454	0.0511455	Frmd4a	-486705
chr3_127639820_127640321	78.682	-0.936221	0.292437	-3.20145	0.00136738	0.0511455	Neurog2	-6686
chr5_140609383_140609884	99.8274	0.745634	0.232859	3.20209	0.00136434	0.0511455	Lfng	-2064
chr8_22548965_22549466	47.9935	1.07511	0.335822	3.20143	0.00136749	0.0511455	Slc20a2	-72178
chr6_90541418_90541919	236.34	0.854689	0.267025	3.20078	0.00137057	0.051174	Aldh1l1	8870
chr11_86671019_86671520	35.726	1.2705	0.397	3.20026	0.00137305	0.0512224	Vmp1	12317
chr1_172057518_172058019	54.1621	-1.06928	0.334324	-3.19835	0.00138218	0.0514303	Nhlh1	0
chr7_29315071_29315572	148.319	0.639147	0.19981	3.19878	0.00138011	0.0514303	Dpf1	-11121
chr8_121669037_121669538	33.5058	1.14463	0.357875	3.1984	0.00138194	0.0514303	AC114005.5	-1758197
chr13_34993971_34994472	203.198	0.561748	0.175706	3.1971	0.00138818	0.0516092	Eci2	0
chr18_68318222_68319224	50.9961	-1.13987	0.356615	-3.19636	0.00139172	0.0516966	Rnmt	-17868
chr12_25864980_25865481	68.988	-1.07541	0.33654	-3.1955	0.0013959	0.0517628	Rnf144a	549774
chr8_126498014_126498515	150.775	0.680471	0.212939	3.19562	0.0013953	0.0517628	RP23-109A22.2	-22949
chr5_64648390_64648891	49.5152	1.0607	0.332027	3.19462	0.00140015	0.0518763	Klf3	154497
chr12_84912573_84913074	194.597	0.626349	0.196118	3.19374	0.00140444	0.0519093	Ltbp2	-36041
chr18_35836856_35837357	110.764	0.704403	0.220529	3.19414	0.00140246	0.0519093	Cxxc5	-7039
chr9_96639379_96639880	64.0997	0.89782	0.281122	3.1937	0.00140464	0.0519093	Rasa2	-7762
chr13_69559271_69559772	122.176	0.742818	0.23264	3.19299	0.00140806	0.0519914	Papd7	-24654
chr17_84059210_84059711	184.136	0.618854	0.193881	3.19193	0.00141327	0.0520951	Zfp36l2	128237
chr5_138776234_138776735	62.6813	0.925429	0.289915	3.19207	0.00141255	0.0520951	Fam20c	-21721
chr2_153049217_153049718	88.9067	-0.974191	0.305275	-3.19119	0.00141687	0.0521834	Xkr7	-17366
chr3_62455871_62456372	178.374	0.701707	0.219924	3.19068	0.0014194	0.0522322	Arhgef26	-117528
chr1_11137968_11138469	30.2809	-1.53584	0.481512	-3.18963	0.00142458	0.0523782	Prex2	-144504
chr17_33955471_33955972	114.01	0.696515	0.218401	3.18915	0.00142692	0.0524198	Rps18	0
chr17_33955471_33955972.1	114.01	0.696515	0.218401	3.18915	0.00142692	0.0524198	Vps52	0
chr12_86699861_86700362	81.9484	-0.85383	0.267872	-3.18746	0.00143529	0.052683	Vash1	-21162
chr5_114456292_114456793	67.0092	-1.07881	0.338591	-3.18617	0.00144169	0.052873	Mvk	-12024
chr1_126660389_126660890	91.95	0.960084	0.301438	3.18501	0.00144748	0.0529061	Nckap5	-167462
chr15_80121613_80122114	76.3833	-0.969623	0.304426	-3.18509	0.00144711	0.0529061	Tab1	11013
chr2_166692065_166692566	133.953	0.700567	0.219918	3.18559	0.0014446	0.0529061	Prex1	21267
chr9_57950457_57950958	81.4675	0.9018	0.283105	3.18539	0.00144559	0.0529061	Sema7a	-10345
chr13_90777849_90778350	82.4941	0.825036	0.259227	3.18268	0.0014592	0.0531554	Atp6ap1l	127006
chr19_10784721_10785222	39.4301	-1.23968	0.38944	-3.18322	0.00145645	0.0531554	Cd6	44837
chr4_82690248_82690749	106.753	-0.840253	0.263969	-3.18315	0.00145681	0.0531554	Zdhhc21	169210
chr6_18688570_18689071	33.8625	-1.44441	0.453806	-3.18288	0.00145817	0.0531554	Lsm8	159508
chr6_53854090_53854591	52.0356	0.995167	0.312706	3.18243	0.00146044	0.053156	Tril	-33260
chr13_47336889_47337390	92.9155	-0.86552	0.272012	-3.18191	0.00146307	0.0532067	Rnf144b	-214234
chr1_182897442_182897943	43.7499	-1.11478	0.350403	-3.18143	0.00146552	0.0532513	Tlr5	74234
chr5_64364440_64364941	50.098	-1.12973	0.355159	-3.1809	0.00146818	0.0533034	Tbc1d1	-204990
chr13_37457071_37457572	127.458	0.752361	0.23655	3.18056	0.0014699	0.0533213	Ly86	-111864
chr3_89225825_89226326	107.445	0.776577	0.244221	3.17981	0.00147371	0.0534146	Thbs3	-10646
chr10_100617160_100617661	49.4214	-1.19277	0.375187	-3.17913	0.00147716	0.053495	RP23-79J15.2	-24791
chr15_68606152_68606653	60.7352	1.02422	0.322236	3.17847	0.00148057	0.0535736	Khdrbs3	321767
chr2_124651046_124651547	53.6174	0.946602	0.297872	3.17789	0.00148353	0.0536361	Sema6d	-40446
chr1_162209456_162209957	48.7275	1.07863	0.339565	3.1765	0.00149063	0.0537582	Dnm3	268078
chr6_90550534_90551035	168.905	0.63728	0.200607	3.17676	0.00148929	0.0537582	Aldh1l1	0
chr8_25143807_25144308	114.879	0.796217	0.250657	3.17651	0.00149056	0.0537582	Plekha2	-41431
chr11_17086114_17086615	32.8513	1.36629	0.430429	3.17426	0.0015022	0.0538625	Plek	-33733
chr12_118564433_118564934	45.1788	1.16871	0.36807	3.17524	0.00149713	0.0538625	Sp4	-263063
chr13_54693784_54694285	637.632	0.440837	0.138832	3.17534	0.00149662	0.0538625	Rnf44	0
chr15_38298860_38299361	333.204	0.45358	0.142893	3.17425	0.00150222	0.0538625	Klf10	1346
chr2_31494841_31495342	76.5195	0.853281	0.268769	3.17478	0.00149952	0.0538625	Ass1	-24635
chr4_27425845_27426346	59.0468	-1.03873	0.327149	-3.17509	0.0014979	0.0538625	Manea	-1078954
chr5_66822385_66822886	33.4888	1.30742	0.411837	3.17462	0.00150034	0.0538625	Limch1	-76541
chr17_56902704_56903205	34.7038	-1.28576	0.405115	-3.1738	0.00150456	0.0539016	Mllt1	32184
chr4_32374655_32375156	64.5581	0.913242	0.287775	3.17346	0.00150635	0.0539214	Bach2	-135706
chr4_148239544_148240045	48.7543	-1.26253	0.397875	-3.17318	0.00150781	0.0539291	Ptchd2	47921
chrX_143966204_143966705	34.9564	-1.42983	0.45065	-3.1728	0.00150974	0.0539537	Dcx	-32893
chr12_102295091_102295592	51.4462	-1.09131	0.344169	-3.17084	0.00151997	0.0541934	Rin3	-11924
chr6_86579867_86580368	44.7168	1.06837	0.336936	3.17084	0.00151997	0.0541934	Asprv1	47796
chr7_49120060_49120561	99.5735	0.910109	0.287028	3.1708	0.0015202	0.0541934	Nav2	-160964
chr10_81137230_81137731	371.811	0.43523	0.137281	3.17035	0.00152255	0.0542327	Zbtb7a	-960
chr2_93891389_93891890	127.699	0.68066	0.214715	3.17006	0.00152408	0.0542366	Accsl	-22232
chr8_84834975_84835476	51.0136	-1.04678	0.330229	-3.16985	0.00152517	0.0542366	Gadd45gip1	-3454
chr8_84834975_84835476.1	51.0136	-1.04678	0.330229	-3.16985	0.00152517	0.0542366	Rad23a	5190
chr1_127339074_127339575	37.6443	-1.2659	0.399535	-3.16844	0.00153261	0.0544258	Mgat5	-134057
chr11_84724067_84724568	73.7205	0.846431	0.267271	3.16694	0.00154053	0.0544258	Mrm1	94948
chr18_42644725_42645226	171.723	0.713674	0.225291	3.16779	0.00153602	0.0544258	Gpr151	-65073
chr5_66384864_66385365	93.4144	0.776532	0.245182	3.16717	0.00153931	0.0544258	Apbb2	233420
chr6_88759786_88760287	56.0186	-1.03332	0.326142	-3.16831	0.0015333	0.0544258	Mgll	-35375
chr6_145018261_145018762	48.6196	-1.13682	0.358868	-3.16779	0.00153601	0.0544258	Bcat1	57423
chr6_145866511_145867012	97.9607	0.724581	0.228785	3.16709	0.00153974	0.0544258	Bhlhe41	-1209
chr8_25537101_25537602	133.679	0.690538	0.218025	3.16724	0.00153893	0.0544258	Fgfr1	-18343
chr1_76433592_76434093	89.8796	0.938028	0.296241	3.16643	0.00154321	0.0544761	Slc4a3	-887327
chr15_27779271_27779772	52.8166	0.985428	0.311304	3.16548	0.00154825	0.0545651	Trio	246077
chr18_36330182_36330683	94.4867	0.794288	0.250912	3.1656	0.00154764	0.0545651	Cystm1	18014
chr13_102232336_102232837	159.93	0.644052	0.203508	3.16474	0.00155219	0.0546425	Cd180	460736
chr15_73222715_73223216	92.2936	0.804435	0.254198	3.1646	0.00155297	0.0546425	Ptk2	199997
chr10_39506269_39506770	60.152	0.93929	0.296853	3.16416	0.0015553	0.0546801	Fyn	-136506
chr8_78742455_78742956	178.455	0.643017	0.203274	3.16331	0.00155989	0.054797	Lsm6	78185
chr5_38531976_38532477	197.897	0.661404	0.209129	3.16266	0.00156334	0.0548738	Wdr1	29330
chr12_88850326_88850827	54.9774	-1.08514	0.343217	-3.16166	0.00156871	0.0549289	Nrxn3	-55823
chr6_39843825_39844326	106.766	-0.806507	0.255079	-3.1618	0.00156798	0.0549289	Tmem178b	28945
chr6_48444013_48444514	148.963	0.635846	0.201086	3.16206	0.00156657	0.0549289	Zfp467	1312
chr12_54385316_54385817	48.5288	1.04651	0.331094	3.16077	0.00157351	0.0550526	Egln3	-181456
chr12_68683102_68683603	58.4105	1.09535	0.346599	3.16028	0.00157617	0.0551012	Rps29	475584
chr1_118864007_118864508	52.0539	-1.06993	0.338584	-3.16001	0.00157764	0.0551081	Gli2	189112
chr15_78036539_78037040	57.1236	-1.0113	0.32013	-3.15904	0.00158288	0.0551835	Cacng2	82989
chr16_40228608_40229109	55.8042	-1.21765	0.385467	-3.15891	0.00158362	0.0551835	Lsamp	-244248
chr2_167491091_167491592	127.542	0.752381	0.238152	3.15925	0.00158176	0.0551835	Spata2	1296
chr14_105513229_105513730	72.2801	0.857392	0.271461	3.15843	0.00158621	0.0552294	Ndfip2	-254657
chr7_114842804_114843305	182.744	-0.693959	0.219795	-3.1573	0.0015924	0.0554004	Insc	-74069
chr12_113132619_113133120	97.9591	0.84159	0.266595	3.15681	0.00159506	0.0554106	Mta1	-34342
chr8_92357487_92357988	291.568	0.476048	0.150802	3.15677	0.00159525	0.0554106	Irx5	0
chr11_100946764_100947265	89.2993	0.818761	0.259412	3.15622	0.0015983	0.0554447	Stat3	-7224
chr12_80003460_80003961	30.9711	-1.37752	0.43646	-3.15613	0.00159879	0.0554447	Zfp36l1	109053
chr15_76511721_76512222	427.14	0.428029	0.135651	3.15537	0.00160295	0.0555003	Dgat1	0
chr9_37358858_37359359	80.3412	0.860923	0.272842	3.15539	0.00160282	0.0555003	Hepacam	7992
chr17_6789445_6789946	49.7448	-1.27592	0.404479	-3.15449	0.00160781	0.0555355	Ezr	-6661
chr18_75394844_75395345	77.8828	-0.918255	0.291067	-3.15479	0.00160616	0.0555355	Smad7	-27316
chr7_92264385_92264886	40.6262	-1.16221	0.368408	-3.15468	0.00160672	0.0555355	Dlg2	-201992
chr10_81597542_81598043	48.8484	-1.044	0.331075	-3.15338	0.00161391	0.0557017	Tle6	2858
chr8_83328314_83328815	32.6998	-1.53013	0.485336	-3.15271	0.0016176	0.0557847	Elmod2	3672
chr12_5996658_5997159	30.1889	-1.35599	0.430253	-3.15161	0.00162375	0.0558686	Klhl29	-620976
chr19_7341573_7342074	335.839	0.50764	0.161098	3.15112	0.00162648	0.0558686	Mark2	0
chr4_93551008_93551509	32.8177	-1.46556	0.46498	-3.15187	0.00162229	0.0558686	Tusc1	-215497
chr8_70649256_70649757	45.8398	1.01352	0.321629	3.15123	0.00162586	0.0558686	Pgpep1	9982
chr9_61468395_61468896	61.6246	-0.942417	0.299073	-3.15113	0.00162641	0.0558686	Tle3	-96013
chr3_115969099_115969600	150.518	0.713193	0.226355	3.15077	0.00162843	0.0558915	Slc30a7	37807
chr10_3979085_3979586	57.7259	-1.09951	0.349274	-3.14798	0.00164401	0.0559615	Mthfd1l	-5968
chr11_45454863_45455364	172.542	-0.688362	0.218614	-3.14875	0.00163968	0.0559615	Clint1	396687
chr11_61484630_61485131	104.061	-0.728613	0.231336	-3.14958	0.00163503	0.0559615	Mfap4	300
chr11_77624282_77624783	114.088	0.692761	0.21998	3.14921	0.00163715	0.0559615	Taok1	-38776
chr11_114294428_114294929	46.4747	-1.04488	0.331784	-3.14927	0.0016368	0.0559615	Sdk2	-228210
chr16_91262761_91263262	148.754	0.677123	0.215105	3.14787	0.00164467	0.0559615	Olig1	6510
chr3_105078176_105078677	151.892	0.6685	0.212359	3.14798	0.00164405	0.0559615	RP23-434P15.1	-11333
chr5_113209024_113209525	90.2327	0.765057	0.242945	3.14909	0.00163777	0.0559615	AC162528.2	11712
chr6_30469381_30469882	57.1816	-0.983947	0.312554	-3.14808	0.00164345	0.0559615	Tmem209	39834
chr8_61390950_61391451	49.0328	-1.21725	0.386664	-3.14809	0.00164339	0.0559615	Sh3rf1	-167079
chr9_31315958_31316459	78.4951	-0.872651	0.277052	-3.14977	0.00163398	0.0559615	Prdm10	-35421
chr6_89347786_89348287	34.5109	-1.32519	0.421052	-3.14734	0.00164763	0.0560182	Plxna1	14334
chr7_58626686_58627187	43.5569	1.10999	0.352742	3.14675	0.00165099	0.0560883	Atp10a	31059
chr15_84829341_84829842	119.052	0.677023	0.215219	3.14574	0.00165669	0.056106	Phf21b	26208
chr19_44997618_44998119	39.5516	-1.29298	0.410966	-3.14619	0.00165411	0.056106	Sema4g	-8518
chr2_180788739_180789240	54.9745	-1.04921	0.333488	-3.14618	0.00165419	0.056106	Bhlhe23	-11839
chr6_100203519_100204020	67.2074	-0.980726	0.311758	-3.14579	0.00165637	0.056106	Rybp	83466
chr18_78495608_78496109	89.1053	-0.875563	0.278405	-3.14493	0.00166127	0.0561735	Gm6133	-145855
chr6_88290286_88290787	163.608	0.723409	0.230014	3.14506	0.00166053	0.0561735	Eefsec	155753
chr2_124470255_124470756	55.0173	0.958081	0.304688	3.14447	0.00166389	0.0562008	Sema6d	139845
chr2_160645647_160646148	413.938	0.42834	0.136226	3.14433	0.00166467	0.0562008	Top1	0
chr1_184440904_184441405	83.4063	0.84026	0.267292	3.1436	0.00166882	0.0562969	Hlx	291215
chr3_95229879_95230380	101.863	0.760829	0.24213	3.14223	0.00167666	0.0565174	Cdc42se1	-1148
chr3_95229879_95230380.1	101.863	0.760829	0.24213	3.14223	0.00167666	0.0565174	Mllt11	1792
chr1_167239897_167240398	142.506	-0.663966	0.211344	-3.14163	0.0016801	0.0565454	Uck2	44923
chr5_112012649_112013150	82.3644	0.89537	0.285	3.14165	0.00168	0.0565454	Cryba4	239369
chr16_46290119_46290620	79.9977	-0.839942	0.267404	-3.1411	0.00168315	0.0566041	RP23-300H4.1	-135042
chr16_4907431_4907932	32.2398	1.24683	0.396996	3.14066	0.00168568	0.0566454	Mgrn1	-21183
chr1_9648606_9649107	44.073	-1.13092	0.36017	-3.13996	0.0016897	0.0566711	AC103620.3	-47408
chr1_38292800_38293301	106.739	0.747381	0.2381	3.13894	0.0016956	0.0566711	Aff3	333885
chr1_64853622_64854123	168.518	0.669605	0.213317	3.13901	0.0016952	0.0566711	Plekhm3	102702
chr1_83296452_83296953	33.3394	-1.33597	0.425489	-3.13986	0.0016903	0.0566711	Sphkap	111248
chr11_102265790_102266291	47.0918	-1.06935	0.340617	-3.13946	0.00169259	0.0566711	Asb16	2452
chr13_104039758_104040259	58.6281	1.02103	0.325254	3.13919	0.00169417	0.0566711	Nln	69356
chr16_56680849_56681350	40.4088	-1.31484	0.418808	-3.13949	0.00169242	0.0566711	Abi3bp	-203004
chr1_160149439_160149940	99.82	0.873577	0.278373	3.13815	0.00170018	0.0566943	Tnn	3641
chr11_36804539_36805040	87.5407	-0.879319	0.280341	-3.1366	0.00170919	0.0566943	Tenm2	430843
chr11_115177516_115178017	107.877	0.759464	0.242045	3.1377	0.00170281	0.0566943	Slc9a3r1	-14176
chr12_89074837_89075338	32.6878	-1.42472	0.454229	-3.13657	0.00170937	0.0566943	Nrxn3	-280334
chr15_83774912_83775413	38.0616	-1.18378	0.377302	-3.13749	0.00170401	0.0566943	Mpped1	4569
chr17_4297120_4297621	30.3502	-1.51743	0.483688	-3.13722	0.00170561	0.0566943	Nox3	-600859
chr3_153085099_153085600	52.1584	-1.0417	0.33209	-3.13681	0.00170799	0.0566943	St6galnac5	-102853
chr4_107128342_107128843	35.1927	-1.30339	0.41543	-3.13746	0.0017042	0.0566943	Cdcp2	-31452
chr5_53525549_53526050	68.2555	-0.969328	0.308993	-3.13705	0.00170656	0.0566943	Rbpj	29784
chr8_14992718_14993219	182.923	0.60191	0.191896	3.13664	0.00170894	0.0566943	Arhgef10	-81056
chr12_25239945_25240446	35.0322	1.16184	0.370605	3.13497	0.00171871	0.0568303	Id2	-142805
chr12_53033261_53033762	68.6624	0.928613	0.296186	3.13524	0.00171716	0.0568303	Akap6	-333879
chr16_41729193_41729694	44.9356	-1.19722	0.381872	-3.13512	0.00171781	0.0568303	Lsamp	-1744833
chr9_62828662_62829163	287.14	0.523358	0.166921	3.13536	0.00171645	0.0568303	Cln6	9622
chr2_164862195_164862696	84.8849	0.768466	0.245289	3.1329	0.00173089	0.0571892	Pltp	-4484
chr6_115762116_115762617	45.5197	1.06333	0.339458	3.13243	0.00173364	0.0572365	Tmem40	0
chr16_86694482_86694983	68.5748	-0.949071	0.303086	-3.13136	0.00174002	0.0574033	N6amt1	659202
chr11_71758393_71758894	387.737	0.529475	0.16911	3.13095	0.00174242	0.0574388	Wscd1	-7709
chr5_38479953_38480454	55.958	0.902528	0.288306	3.13045	0.00174538	0.057449	Slc2a9	22690
chr9_46119961_46120462	79.6021	0.901845	0.288083	3.1305	0.00174508	0.057449	Sik3	-107142
chr11_87426605_87427106	94.3195	0.747944	0.239056	3.12874	0.00175556	0.0574528	Tex14	-21541
chr17_8351016_8351517	108.939	0.764636	0.244398	3.12865	0.0017561	0.0574528	Prr18	-10611
chr17_83238432_83238933	43.4371	-1.25593	0.401265	-3.12993	0.00174845	0.0574528	Pkdcc	-23141
chr17_87745237_87745738	43.1744	-1.1065	0.35358	-3.12941	0.0017516	0.0574528	Kcnk12	52257
chr4_81937299_81937800	42.6217	-1.11775	0.357114	-3.12996	0.00174827	0.0574528	Mpdz	-494492
chr4_148229655_148230156	37.2152	1.13654	0.363156	3.12961	0.00175036	0.0574528	Ptchd2	57810
chr5_35926577_35927078	43.03	-1.15026	0.367644	-3.12873	0.00175562	0.0574528	Afap1	-33259
chr6_145768632_145769133	64.7453	0.973258	0.311031	3.12914	0.0017532	0.0574528	Rassf8	-21885
chr4_127640156_127640657	75.2501	0.849807	0.271641	3.12842	0.00175747	0.0574546	Gjb5	-281975
chr7_143783904_143784405	214.763	-0.554822	0.177376	-3.12793	0.0017604	0.0575068	Mrgpre	96
chr15_84310200_84310701	52.8364	-1.03625	0.331395	-3.12692	0.00176648	0.0576619	Parvb	-78158
chr8_81452037_81452538	49.0438	1.06575	0.341025	3.12512	0.0017773	0.0579714	Inpp4b	-109476
chr1_118982381_118982882	170.886	-0.630366	0.201749	-3.12451	0.00178102	0.0580492	Gli2	70738
chr2_85110386_85110887	43.6582	-1.11812	0.358047	-3.12283	0.00179124	0.0583384	Aplnr	25338
chr12_53587596_53588097	138.567	0.688615	0.220533	3.1225	0.00179322	0.058359	Npas3	-338920
chr12_100407919_100408420	34.2165	1.34968	0.432363	3.12164	0.00179849	0.0584679	Ttc7b	112407
chr16_89530470_89530971	67.156	0.965444	0.309287	3.12151	0.00179926	0.0584679	Krtap7-1	-22147
chr1_164988901_164989402	46.1508	0.999727	0.320419	3.12007	0.0018081	0.0584944	Xcl1	-53374
chr10_22746283_22746784	122.422	-0.781209	0.250474	-3.11892	0.00181515	0.0584944	Tbpl1	-14345
chr10_120426147_120426648	76.7373	0.845162	0.270939	3.11938	0.00181231	0.0584944	Hmga2	49822
chr15_84811037_84811538	79.0563	0.790822	0.253485	3.1198	0.00180975	0.0584944	Phf21b	44512
chr17_56380178_56380679	294.338	0.525237	0.16844	3.11825	0.0018193	0.0584944	Kdm4b	-54105
chr18_38878464_38878965	30.2613	-1.36052	0.436291	-3.11838	0.00181849	0.0584944	Fgf1	39807
chr2_146310201_146310702	42.4736	-1.14755	0.368057	-3.11786	0.00182167	0.0584944	Ralgapa2	201643
chr3_135726071_135726572	240.56	0.623967	0.200027	3.11942	0.0018121	0.0584944	Nfkb1	-34525
chr4_32889210_32889711	149.993	0.678049	0.217467	3.11794	0.00182122	0.0584944	Ankrd6	61131
chr5_30863692_30864193	54.8424	0.915938	0.293634	3.11932	0.0018127	0.0584944	Mapre3	-49052
chr5_72755810_72756311	57.7046	-0.976564	0.312989	-3.12013	0.00180774	0.0584944	Tec	112149
chr6_38840335_38840836	64.7878	-0.978959	0.313857	-3.11912	0.00181391	0.0584944	Hipk2	35330
chr7_6409998_6410499	90.5088	0.777849	0.249289	3.12027	0.00180687	0.0584944	RP24-79E24.1	0
chr7_6409998_6410499.1	90.5088	0.777849	0.249289	3.12027	0.00180687	0.0584944	Smim17	-11284
chr7_78680769_78681270	36.0338	-1.31654	0.422241	-3.11798	0.00182097	0.0584944	Mrpl46	101820
chr9_90255807_90256308	61.5164	0.931694	0.298529	3.12095	0.00180271	0.0584944	Tbc1d2b	14464
chr9_91386853_91387354	51.2954	0.98375	0.31549	3.11816	0.00181984	0.0584944	Zic4	-17884
chr12_77039289_77039790	32.1519	-1.53646	0.492906	-3.11715	0.00182609	0.0585486	Max	-77088
chr4_152392084_152392585	36.3591	-1.42875	0.458395	-3.11685	0.00182797	0.0585486	Kcnab2	85287
chr6_95167550_95168051	33.917	1.2622	0.404975	3.11672	0.00182873	0.0585486	Kbtbd8	-49811
chr7_139368609_139369110	52.8855	-1.0018	0.321429	-3.11672	0.00182876	0.0585486	Inpp5a	19999
chr17_8339590_8340091	91.5418	0.74138	0.237893	3.11644	0.00183049	0.0585609	Prr18	315
chr6_91301803_91302304	265.362	0.7836	0.251496	3.11576	0.00183473	0.0586533	Fbln2	-89349
chr1_36379515_36380016	54.334	0.955065	0.306652	3.11449	0.0018426	0.0588182	Fer1l5	-7225
chr4_47035744_47036245	69.2154	0.912742	0.293062	3.1145	0.00184255	0.0588182	Anks6	21183
chr1_94027621_94028122	82.3133	0.950933	0.305454	3.11318	0.00185085	0.0589946	Neu4	-7171
chr11_35670666_35671167	39.7421	-1.26073	0.404962	-3.11321	0.00185063	0.0589946	Slit3	-549443
chr4_46690528_46691029	33.8244	-1.2637	0.405994	-3.11262	0.00185436	0.0590631	Gabbr2	300845
chr15_78119679_78120180	267.029	0.482603	0.155096	3.11164	0.00186049	0.0592147	Cacng2	0
chr8_13468638_13469139	45.6962	-1.10681	0.355874	-3.11012	0.00187008	0.0594763	Gas6	25352
chr15_80825533_80826034	31.7797	1.23568	0.397439	3.1091	0.00187659	0.059509	Tnrc6b	-114221
chr17_30825877_30826378	33.2615	1.23066	0.395766	3.10957	0.00187361	0.059509	Dnah8	-201524
chr2_153703344_153703845	49.205	-1.0902	0.350625	-3.10931	0.00187527	0.059509	RP23-244H7.1	-6693
chr9_61553537_61554038	50.3004	0.978363	0.314677	3.1091	0.0018766	0.059509	Tle3	-181155
chr12_70881239_70881740	41.7497	-1.19992	0.385979	-3.10877	0.00187866	0.0595306	Frmd6	-55726
chr15_90291771_90292272	37.9477	1.32711	0.427107	3.10721	0.0018886	0.059802	Alg10b	-67461
chr10_86375808_86376309	102.604	0.727339	0.234195	3.1057	0.00189829	0.0598362	Syn3	122574
chr12_25098653_25099154	213.814	0.533894	0.1719	3.10584	0.0018974	0.0598362	Id2	-1513
chr12_70555588_70556089	32.522	1.2727	0.409678	3.10657	0.0018927	0.0598362	Tmx1	-102494
chr15_66815392_66815893	52.1653	-1.11374	0.358568	-3.10608	0.00189585	0.0598362	Sla	15937
chr15_66815392_66815893.1	52.1653	-1.11374	0.358568	-3.10608	0.00189585	0.0598362	Tg	-99504
chr2_168677534_168678035	62.8741	-0.95871	0.308706	-3.10557	0.00189911	0.0598362	Atp9a	64099
chr6_90762022_90762523	96.3018	0.800197	0.257573	3.10668	0.00189202	0.0598362	Iqsec1	226163
chr9_44498538_44499039	159.736	0.577249	0.185877	3.10554	0.00189934	0.0598362	Bcl9l	-15714
chr1_15446593_15447094	48.2434	1.06976	0.344643	3.10398	0.00190937	0.0601083	Kcnb2	-159340
chr1_74397266_74397767	186.793	0.558111	0.179847	3.10326	0.00191401	0.0601672	Ctdsp1	-5758
chr12_12496691_12497192	87.2421	0.810392	0.261128	3.10342	0.00191295	0.0601672	Fam49a	-234553
chr1_119019980_119020481	31.2443	-1.42992	0.460925	-3.10228	0.00192035	0.0602352	Gli2	33139
chr16_91246252_91246753	75.5113	-0.944738	0.304516	-3.10242	0.00191943	0.0602352	Olig2	-20703
chr2_152735952_152736453	149.397	0.66972	0.215873	3.10238	0.00191971	0.0602352	Id1	0
chr5_123019604_123020105	101.853	0.728232	0.234805	3.10143	0.00192586	0.0603644	Orai1	-4531
chr7_125632240_125632741	55.2907	0.955253	0.308058	3.10088	0.00192944	0.0604331	Il21r	-28747
chr7_49018608_49019109	41.86	-1.15416	0.372355	-3.09962	0.00193769	0.0606476	Nav2	-59512
chr17_47694769_47695270	269.012	0.508211	0.164004	3.09878	0.00194319	0.0607759	Frs3	0
chr5_44151731_44152232	111.907	-0.883344	0.285178	-3.09752	0.00195149	0.0609914	Prom1	-49699
chr5_101933091_101933592	59.6135	0.968511	0.31275	3.09676	0.00195649	0.0611037	Wdfy3	136330
chr15_8626926_8627427	77.6738	0.900931	0.291021	3.09576	0.00196311	0.0612664	Slc1a3	82983
chr14_103440217_103440718	64.8665	0.987009	0.31891	3.09494	0.00196851	0.0613906	Scel	72624
chr10_8391249_8391750	123.383	0.78684	0.25436	3.0934	0.00197874	0.0616654	Ust	127076
chr2_33309340_33309841	86.3879	-0.831394	0.268814	-3.09282	0.00198264	0.0617425	Ralgps1	61646
chr5_89911899_89912400	61.5163	1.08183	0.349894	3.09188	0.00198892	0.0618936	Adamts3	-28565
chr17_24208115_24208616	31.9709	-1.25769	0.406842	-3.09136	0.00199243	0.0619583	Tbc1d24	-2553
chr2_57597701_57598202	62.4235	-0.950852	0.307663	-3.09056	0.00199777	0.0620492	Gpd2	-359405
chr4_58326654_58327155	113.555	0.814082	0.263415	3.0905	0.00199822	0.0620492	Musk	-40693
chr10_62401632_62402133	92.4848	0.813866	0.26337	3.0902	0.00200019	0.0620661	Hkdc1	20359
chr17_64200157_64200658	35.778	-1.20343	0.389559	-3.08922	0.0020068	0.0621862	Pja2	131259
chr7_145093734_145094235	84.2356	0.765545	0.247813	3.0892	0.00200693	0.0621862	RP23-396L12.1	113846
chr7_112697527_112698028	45.4529	1.0724	0.347219	3.08855	0.00201136	0.0622789	Tead1	-18210
chr7_145335211_145335712	75.162	-0.917258	0.297023	-3.08817	0.00201391	0.0623134	Mrgprd	-20377
chr2_26487209_26487710	197.095	0.590729	0.191336	3.08739	0.00201924	0.0623892	Notch1	16113
chr2_35928098_35928599	36.4806	-1.29415	0.419151	-3.08755	0.00201812	0.0623892	Ttll11	51026
chr1_131351473_131351974	105.567	-0.849547	0.275192	-3.08711	0.00202112	0.0624028	Srgap2	175374
chr17_31535748_31536249	147.765	0.584243	0.189297	3.08639	0.00202603	0.0625098	Ndufv3	-15634
chr2_30981903_30982404	506.522	0.389513	0.126313	3.0837	0.00204442	0.0629427	RP23-221O14.10	0
chr2_30981903_30982404.1	506.522	0.389513	0.126313	3.0837	0.00204442	0.0629427	Usp20	0
chr2_74415992_74416493	100.309	0.780474	0.253068	3.08405	0.00204207	0.0629427	Lnpk	162456
chr2_179605154_179605655	64.0397	-0.91203	0.295753	-3.08375	0.00204406	0.0629427	Cdh4	-162724
chr12_44436948_44437449	175.505	0.662591	0.214935	3.08275	0.00205098	0.0629964	Nrcam	-108063
chr13_35884735_35885236	92.4696	-0.760356	0.246627	-3.08302	0.00204911	0.0629964	Rpp40	21124
chr2_30721778_30722279	209.924	0.593026	0.192378	3.08261	0.00205197	0.0629964	RP23-221O14.1	79429
chr6_64728809_64729310	58.805	-0.97643	0.316713	-3.08301	0.00204915	0.0629964	Atoh1	0
chr2_26485650_26486151	135.691	0.733024	0.237832	3.0821	0.00205543	0.0630132	Notch1	17672
chr8_122906425_122906926	102.369	0.81039	0.262925	3.08221	0.00205473	0.0630132	AC114005.5	-2995585
chr8_122906425_122906926.1	102.369	0.81039	0.262925	3.08221	0.00205473	0.0630132	Ankrd11	135352
chr15_78178250_78178751	64.7132	0.824764	0.267625	3.08178	0.00205765	0.0630367	Ift27	-4143
chr4_134535090_134535591	351.537	0.43891	0.142438	3.08142	0.00206015	0.0630689	Mtfr1l	0
chr10_39321105_39321606	39.1165	-1.12236	0.364436	-3.07973	0.00207192	0.0631196	Fyn	48158
chr14_34969040_34969541	106.074	0.809662	0.262936	3.07931	0.00207479	0.0631196	Grid1	-148933
chr3_153659680_153660181	101.587	0.752443	0.244292	3.0801	0.00206932	0.0631196	St6galnac3	64994
chr4_119901969_119902470	31.5583	-1.30158	0.422592	-3.07998	0.00207014	0.0631196	Hivep3	-87475
chr4_129125696_129126197	51.0304	-1.0827	0.351607	-3.07929	0.00207491	0.0631196	Hpca	-3660
chr4_136652131_136652632	95.1823	-0.870587	0.282593	-3.08071	0.00206508	0.0631196	Ephb2	183357
chr4_149812142_149812643	66.8232	1.05854	0.343617	3.08058	0.00206601	0.0631196	Slc25a33	-37865
chr5_140607062_140607563	175.225	0.595704	0.193398	3.0802	0.00206859	0.0631196	Lfng	0
chr5_149442331_149442832	36.4214	-1.2259	0.398086	-3.07949	0.00207356	0.0631196	Tex26	-2672
chr9_71975995_71976496	83.8703	-0.947234	0.307635	-3.07908	0.00207643	0.0631213	Tcf12	135376
chr13_4771377_4771878	181.058	0.5814	0.188859	3.07849	0.00208054	0.0632022	Akr1e1	-162203
chr10_89460918_89461419	49.6015	1.01464	0.329657	3.07786	0.00208492	0.0632466	Nr1h4	72167
chr8_13047711_13048212	50.0959	-1.01814	0.330784	-3.07795	0.00208433	0.0632466	F10	-10404
chr10_4402233_4402734	51.4118	0.992728	0.322634	3.07694	0.00209135	0.0633144	Rmnd1	29655
chr10_5633665_5634166	64.0976	1.36469	0.443483	3.07721	0.00208948	0.0633144	Vip	5052
chr11_94246320_94246821	81.0072	-0.854189	0.277612	-3.07692	0.00209154	0.0633144	Wfikkn2	-3613
chr7_129774367_129774868	50.2031	-0.985475	0.320312	-3.07661	0.00209368	0.063335	Wdr11	-182505
chr1_128659825_128660326	86.2167	0.876001	0.284845	3.07536	0.00210251	0.0633369	Cxcr4	-67535
chr11_115164848_115165349	55.5864	0.877633	0.28532	3.07596	0.00209826	0.0633369	Slc9a3r1	-1508
chr2_150808368_150808869	139.666	0.686267	0.223092	3.07617	0.00209679	0.0633369	Pygb	-21634
chr3_95163452_95164454	66.6712	-1.03296	0.335876	-3.07541	0.00210211	0.0633369	Sema6c	-2948
chr5_125128863_125129364	114.928	-0.728734	0.236952	-3.07544	0.00210189	0.0633369	Ncor2	49856
chr9_40469657_40470158	83.3267	0.870821	0.283094	3.07609	0.00209737	0.0633369	Gramd1b	61226
chr16_45697939_45698440	73.3752	0.973856	0.316754	3.07449	0.00210864	0.063476	Tmprss7	-4281
chr19_4492747_4493248	99.5149	-0.739198	0.240445	-3.07429	0.00211006	0.063476	2010003K11Rik	5336
chr16_43080844_43081345	32.8322	-1.34907	0.439087	-3.07244	0.00212318	0.0638266	Zbtb20	-173193
chr4_127985855_127986356	221.79	0.613976	0.199868	3.0719	0.00212699	0.063877	Csmd2	1688
chr6_125727497_125727998	42.5575	-1.06896	0.347993	-3.07179	0.00212781	0.063877	Ano2	-37079
chr11_113326331_113326832	64.1477	-0.973281	0.316896	-3.07129	0.00213135	0.0639389	Slc39a11	238937
chr15_83166589_83167090	64.9289	0.932422	0.303622	3.071	0.00213345	0.0639577	Cyb5r3	5503
chr1_89385075_89385576	30.7512	1.19935	0.390582	3.07067	0.00213579	0.0639836	Agap1	69230
chr13_41338952_41339453	74.8702	0.879837	0.286587	3.07005	0.00214022	0.0639836	Nedd9	147841
chr14_51008232_51008733	69.7626	0.892086	0.290557	3.07026	0.00213874	0.0639836	Rnase10	-482
chr16_34322532_34323033	74.6876	-0.855173	0.278535	-3.07025	0.0021388	0.0639836	Kalrn	250500
chr9_101908747_101909248	39.887	1.11498	0.363225	3.06967	0.00214296	0.0640214	RP24-364K10.1	29233
chr5_111254794_111255295	55.9435	0.885856	0.288666	3.06879	0.00214925	0.0641652	Ttc28	-374992
chr18_57673616_57674117	32.1572	-1.45027	0.472708	-3.06801	0.00215492	0.0642648	AC102232.1	-139837
chr4_136140264_136140765	200.098	0.566432	0.184631	3.06792	0.00215555	0.0642648	Id3	2732
chr15_72755847_72756348	55.9811	-0.965081	0.314703	-3.06664	0.00216479	0.0644959	Trappc9	304857
chr1_136055706_136056207	59.6125	1.01067	0.329653	3.06587	0.00217039	0.0646184	Cacna1s	-2957
chr1_120115489_120115990	191.36	0.598659	0.195326	3.06493	0.00217721	0.0647769	Dbi	5089
chr16_44502287_44502788	48.1343	-1.08307	0.353539	-3.06352	0.00218751	0.0649496	Boc	56110
chr2_127854501_127855002	281.772	0.543019	0.17725	3.06359	0.00218702	0.0649496	Acoxl	0
chr4_22946712_22947213	54.6931	-1.08231	0.353275	-3.06366	0.00218646	0.0649496	Pou3f2	-458346
chr9_64207550_64208051	41.9108	1.06507	0.347757	3.0627	0.00219349	0.0650826	Map2k1	45581
chr4_124570985_124571486	35.5571	1.1056	0.361046	3.06222	0.00219702	0.0651428	3100002H09Rik	39318
chr19_40433935_40434436	111.238	0.751487	0.245458	3.06156	0.00220183	0.0652408	Sorbs1	79315
chr17_10402049_10402550	51.1082	0.993602	0.324597	3.06103	0.00220574	0.0652868	Qk	-82688
chr8_12432534_12433035	140.889	0.671138	0.219258	3.06094	0.0022064	0.0652868	Sox1	-37240
chr13_48422487_48422988	65.1836	0.846027	0.276548	3.05924	0.00221899	0.0656146	Zfp169	90449
chr11_11844326_11844827	140.004	-0.728229	0.238086	-3.05869	0.0022231	0.0656393	Ddc	53218
chr15_72677407_72677908	49.6361	-1.14646	0.374843	-3.05852	0.00222437	0.0656393	Trappc9	383297
chr5_74677711_74678212	156.226	-0.645515	0.211043	-3.05868	0.00222313	0.0656393	Lnx1	-82
chrX_99225072_99225573	57.347	-1.03645	0.339007	-3.05732	0.00223328	0.0658574	Efnb1	-88943
chr16_12901733_12902234	57.0033	0.992407	0.324644	3.05691	0.0022363	0.0659017	Ercc4	207450
chr2_29453226_29453727	40.1434	1.08764	0.35593	3.05578	0.00224479	0.0660171	Med27	-106408
chr4_148770552_148771053	47.9714	-1.08126	0.353841	-3.05578	0.00224478	0.0660171	Casz1	33376
chr9_101613890_101614391	50.5023	-1.05122	0.344007	-3.0558	0.00224458	0.0660171	RP24-364K10.1	324090
chr10_75125516_75126017	35.8753	-1.20684	0.395046	-3.05493	0.00225114	0.066159	Bcr	-64925
chr11_113373259_113373760	40.4149	-1.13715	0.372346	-3.05401	0.00225805	0.0663171	Slc39a11	192009
chr1_119902521_119903022	131.627	-0.801351	0.262568	-3.05197	0.00227343	0.0663483	Tmem177	10187
chr12_40898335_40898836	44.1216	-1.2408	0.406546	-3.05205	0.00227284	0.0663483	Immp2l	125254
chr13_76189153_76189654	31.5883	-1.30234	0.426756	-3.05173	0.00227529	0.0663483	Ttc37	-90420
chr13_96313210_96313711	92.0985	0.847834	0.277769	3.0523	0.00227096	0.0663483	Poc5	74583
chr2_22028964_22029465	34.8289	1.41041	0.462188	3.05159	0.00227635	0.0663483	Myo3a	198038
chr5_35552400_35552901	90.4337	-0.800841	0.262412	-3.05184	0.0022744	0.0663483	Trmt44	22170
chr6_124900959_124901460	69.1374	0.872673	0.285828	3.05314	0.00226462	0.0663483	Lag3	10246
chr7_28168268_28168769	79.7238	0.777384	0.254584	3.05355	0.00226151	0.0663483	Fbl	941
chr8_70630636_70631137	47.7108	1.04785	0.343346	3.05189	0.00227408	0.0663483	Gdf15	1320
chr8_70880067_70880568	36.1768	-1.26394	0.414106	-3.05221	0.00227162	0.0663483	Ccdc124	-6132
chr8_126308950_126309451	52.973	0.972395	0.318472	3.05331	0.0022633	0.0663483	Slc35f3	-10393
chr9_110205931_110206432	176.462	0.595407	0.195123	3.05144	0.00227747	0.0663483	Smarcc1	-73952
chr8_121241698_121242199	102.026	0.729748	0.239174	3.05112	0.0022799	0.0663744	AC114005.5	-1330858
chr12_100778982_100779483	409.865	0.498634	0.163471	3.0503	0.00228615	0.0663779	RP23-359F12.1	0
chr5_81028767_81029268	114.377	0.771346	0.252876	3.0503	0.00228615	0.0663779	Adgrl3	-7566
chr6_55805244_55805745	87.5307	0.931335	0.305269	3.05087	0.00228182	0.0663779	Ccdc129	31150
chr9_24379248_24379749	33.5252	-1.32767	0.43522	-3.05057	0.00228407	0.0663779	Dpy19l1	123392
chr15_83142736_83143237	41.0894	1.02517	0.336235	3.04898	0.0022962	0.0665111	Poldip3	6148
chr17_88388351_88388852	39.4675	-1.1528	0.378105	-3.04889	0.00229687	0.0665111	Foxn2	51859
chr2_137730462_137730963	52.6413	-1.06068	0.347861	-3.04916	0.00229482	0.0665111	Btbd3	525602
chr2_138047708_138048209	85.2309	-0.812518	0.266483	-3.04904	0.00229576	0.0665111	Btbd3	208356
chr9_118694390_118694891	53.8492	-1.15095	0.377535	-3.04859	0.00229917	0.0665333	Itga9	-87701
chr3_59136193_59136694	96.2361	0.837682	0.27484	3.0479	0.0023045	0.0665985	Med12l	-130369
chr3_59136193_59136694.1	96.2361	0.837682	0.27484	3.0479	0.0023045	0.0665985	P2ry14	16799
chr7_80197833_80198334	173.592	0.586268	0.192342	3.04805	0.00230328	0.0665985	Sema4b	-10993
chr3_86807990_86808491	118.096	0.708307	0.232471	3.04686	0.00231248	0.0667478	Dclk2	112362
chr3_98198169_98198670	121.197	0.679078	0.222881	3.04682	0.00231275	0.0667478	Reg4	23486
chr1_63763247_63763748	76.7705	0.887821	0.291529	3.0454	0.00232375	0.0670138	RP23-132J5.2	5520
chr12_111920047_111920548	60.6156	-0.972832	0.319545	-3.04443	0.00233124	0.0670138	Ppp1r13b	-11937
chr18_5978362_5978863	114.203	-0.723376	0.237577	-3.0448	0.00232836	0.0670138	Arhgap12	157236
chr6_90431436_90431937	32.7674	1.18084	0.387845	3.04462	0.00232974	0.0670138	Cfap100	-2639
chr9_50235869_50236370	93.1968	0.793571	0.260632	3.04479	0.00232841	0.0670138	RP23-68E4.3	108599
chr9_110255355_110255856	115.443	0.742299	0.243766	3.04512	0.00232585	0.0670138	Cspg5	-11573
chr1_24226065_24226566	77.1746	-0.915757	0.30086	-3.0438	0.00233613	0.0671101	Col9a1	-48456
chr1_93071446_93071947	34.6119	-1.31478	0.432056	-3.04307	0.00234181	0.0672202	Kif1a	30005
chr7_29438638_29439139	39.7442	1.10459	0.363005	3.0429	0.00234307	0.0672202	Sipa1l3	66322
chr4_48842733_48843234	34.9573	-1.30026	0.427356	-3.04256	0.00234574	0.0672522	Murc	-179220
chr17_7228471_7228972	90.8958	0.728222	0.239402	3.04184	0.00235136	0.0673687	Rps6ka2	-58357
chr16_8916045_8916546	36.5438	-1.36328	0.44822	-3.04154	0.0023537	0.0673915	RP23-74O4.1	-85946
chr6_90561249_90561750	87.6392	0.775577	0.255032	3.0411	0.00235715	0.0674455	Aldh1l1	-10461
chr5_125675508_125676009	158.746	0.640815	0.210781	3.04019	0.00236426	0.0676046	Tmem132b	-143122
chr7_78389907_78390408	32.8182	-1.28213	0.422218	-3.03665	0.00239225	0.0683598	Ntrk3	188001
chr7_141047780_141048281	104.772	0.691796	0.227857	3.0361	0.00239662	0.0684055	B4galnt4	12823
chr9_123385315_123385816	63.4842	1.00273	0.330276	3.03605	0.00239701	0.0684055	Lars2	-18389
chr11_53763676_53764177	113.59	0.700115	0.230652	3.03538	0.00240235	0.06842	Irf1	5837
chr13_53147726_53148227	29.9225	1.2712	0.418808	3.03528	0.0024031	0.06842	Ror2	137898
chr15_37031547_37032048	97.5232	0.723492	0.238362	3.03526	0.00240325	0.06842	Zfp706	-23774
chr17_77930984_77931485	35.2994	-1.25557	0.413725	-3.0348	0.00240699	0.06842	Crim1	268763
chr6_54718799_54719300	47.2004	0.978787	0.322486	3.03513	0.00240435	0.06842	Mturn	-37176
chr7_84029246_84029747	48.8415	-1.06938	0.352369	-3.03484	0.00240663	0.06842	Cemip	56756
chr1_86526333_86526834	355.415	0.431795	0.142334	3.03367	0.00241602	0.068615	Ptma	0
chr14_65121832_65122333	61.8673	0.924322	0.30472	3.03334	0.0024186	0.068615	Extl3	-23727
chr17_26716075_26716576	294.073	0.437823	0.144336	3.03335	0.00241851	0.068615	Crebrf	-426
chr4_66401296_66401797	65.6082	-0.952111	0.313957	-3.03261	0.00242446	0.0687363	Astn2	2687
chr9_121383266_121383767	53.905	-1.04947	0.346134	-3.03197	0.00242963	0.0688378	Trak1	-85755
chr8_88522515_88523016	50.7713	-0.982676	0.32415	-3.03154	0.00243306	0.0688902	Nkd1	-1162
chr12_53382546_53383047	73.0543	0.797963	0.263318	3.03041	0.0024422	0.0691036	Npas3	-133870
chr19_43905087_43905588	63.6109	0.904744	0.298631	3.02964	0.00244847	0.0691908	Dnmbp	34604
chr7_64981349_64981850	74.7781	-0.914638	0.301892	-3.02969	0.00244808	0.0691908	Fam189a1	174721
chr10_64130333_64130834	74.2055	-0.960975	0.317257	-3.02901	0.00245355	0.0692545	Ctnna3	-700236
chr2_142611035_142611536	40.0787	-1.20612	0.398195	-3.02897	0.00245392	0.0692545	Kif16b	289996
chr16_90382851_90383352	54.8476	-1.06807	0.352712	-3.02817	0.00246036	0.0693912	Hunk	3045
chr14_56970298_56970799	30.6352	1.22287	0.404022	3.02675	0.00247198	0.0696281	RP24-448F1.5	44335
chr16_32154297_32154798	38.515	-1.25158	0.4135	-3.0268	0.00247156	0.0696281	Nrros	10788
chr8_22784423_22784924	88.6181	0.851676	0.281408	3.02648	0.00247422	0.069646	Ap3m2	20699
chr1_91209424_91209925	213.74	0.587641	0.194205	3.02588	0.00247911	0.0697385	Ramp1	-29603
chr13_34192567_34193068	40.7095	1.04354	0.344925	3.02541	0.00248298	0.0697568	Slc22a23	152115
chr16_31255672_31256173	109.123	0.818975	0.270693	3.02548	0.0024824	0.0697568	Ppp1r2	19105
chr1_118776629_118777130	50.794	-1.01984	0.337143	-3.02495	0.00248674	0.0697721	Tfcp2l1	-148684
chr6_91862685_91863186	44.8772	-1.08602	0.359002	-3.02511	0.0024854	0.0697721	Ccdc174	14867
chr11_113467236_113467737	62.2028	-0.970242	0.320895	-3.02354	0.00249833	0.0700517	Slc39a11	98032
chr11_119522546_119523047	169.742	-0.699894	0.231525	-3.02297	0.00250304	0.070092	Nptx1	24707
chr2_26329983_26330484	184.276	0.579612	0.191748	3.02278	0.00250461	0.070092	Gpsm1	-14469
chr4_125634884_125635385	45.9407	-1.07963	0.357156	-3.02287	0.00250392	0.070092	Grik3	-144185
chr10_113105733_113106234	29.8632	-1.40564	0.465162	-3.02182	0.00251257	0.0702239	Atxn7l3b	-176738
chr12_81724143_81724644	74.9841	0.874686	0.289446	3.02193	0.00251171	0.0702239	Map3k9	56532
chr15_88999075_88999576	56.7976	0.892486	0.295493	3.02033	0.00252496	0.0704405	Mov10l1	-16167
chr4_123602651_123603152	45.7436	0.993724	0.329035	3.02011	0.00252682	0.0704405	Macf1	81209
chr7_116282690_116283191	171.394	0.662474	0.219352	3.02014	0.00252654	0.0704405	Plekha7	25186
chr9_55067555_55068056	51.6382	-0.981403	0.324935	-3.02031	0.00252516	0.0704405	Chrnb4	-18776
chr1_51671326_51671827	53.3497	-1.01183	0.335162	-3.01892	0.00253675	0.0706721	Nabp1	-192901
chr6_50890613_50891114	66.9313	-0.911383	0.301955	-3.01827	0.00254223	0.0707792	Npvf	-236174
chr12_76388757_76389258	46.6656	-1.11332	0.368892	-3.01802	0.00254436	0.0707928	Zbtb1	-18492
chr7_96400314_96400815	200.743	0.65965	0.218594	3.0177	0.002547	0.070821	Tenm4	-229069
chr1_125724264_125724765	32.2662	-1.29266	0.428428	-3.01721	0.00255112	0.0708447	Gpr39	-47270
chr9_64058172_64058673	47.9031	0.990224	0.328183	3.01729	0.00255045	0.0708447	Smad6	-36113
chr1_82220886_82221387	56.7218	-1.06887	0.354349	-3.01643	0.00255771	0.0708915	Gm9747	11725
chr10_43106158_43106659	42.9878	-1.12614	0.373305	-3.01669	0.00255552	0.0708915	Sobp	67872
chr7_49375492_49375993	61.3618	0.942072	0.312311	3.01646	0.00255748	0.0708915	Nav2	-416396
chr11_115779275_115779776	129.819	0.717251	0.237859	3.01545	0.00256598	0.0710018	Tmem94	-13843
chr13_18282475_18282976	40.3032	1.30012	0.431223	3.01495	0.00257023	0.0710018	Pou6f2	-109935
chr15_101266547_101267048	114.877	0.648564	0.215095	3.01524	0.00256773	0.0710018	Nr4a1	-12279
chr2_102463941_102464442	102.208	0.702186	0.232858	3.01552	0.00256542	0.0710018	Fjx1	-11442
chr4_32179618_32180119	39.0232	1.24702	0.413615	3.01492	0.00257047	0.0710018	Bach2	58831
chr5_120197881_120198382	71.4904	-0.87978	0.291821	-3.0148	0.00257152	0.0710018	Rbm19	-81417
chr10_122693111_122693612	65.2763	-0.911272	0.302315	-3.01431	0.00257565	0.0710707	Ppm1h	-14334
chr1_165046555_165047056	76.8666	0.773217	0.256619	3.01309	0.00258602	0.071075	Xcl1	-111028
chr11_60311283_60311784	280.031	0.474034	0.157318	3.01322	0.00258494	0.071075	Tom1l2	41122
chr11_63135603_63136104	143.305	0.610778	0.202694	3.01331	0.00258418	0.071075	Pmp22	-6622
chr17_7278763_7279264	55.1207	-0.968708	0.321468	-3.01339	0.00258346	0.071075	Rps6ka2	-108649
chr2_5572381_5572882	77.6129	0.907464	0.301189	3.01294	0.00258729	0.071075	Camk1d	141634
chr4_114678194_114678695	30.8502	-1.31699	0.437049	-3.01337	0.00258364	0.071075	RP23-303I9.1	143027
chr8_61444376_61444877	38.5392	1.13497	0.376622	3.01355	0.00258206	0.071075	Cbr4	42857
chr10_82083008_82083509	35.1382	-6.21275	2.06262	-3.01207	0.00259474	0.0711559	RP24-406I15.3	0
chr17_9906006_9906507	212.329	0.62376	0.207086	3.01208	0.00259461	0.0711559	Pabpc6	-236302
chr17_83210547_83211048	43.6485	-1.0771	0.357602	-3.01202	0.00259516	0.0711559	Pkdcc	4244
chr5_133432389_133432890	67.4365	0.899557	0.298754	3.01103	0.00260363	0.0713431	Gatsl2	666821
chr10_94575863_94576364	69.6788	0.844015	0.280422	3.00981	0.00261413	0.07146	Tmcc3	-61007
chr15_78835265_78835766	125.324	0.676478	0.22475	3.00991	0.00261323	0.07146	Cdc42ep1	6858
chr16_16930783_16931284	91.911	-0.84355	0.280279	-3.00968	0.00261526	0.07146	Ppm1f	-34315
chr16_92348865_92349366	143.852	0.653598	0.217184	3.00942	0.00261745	0.07146	Kcne1	10103
chr18_22984139_22984640	35.0802	-1.33564	0.443825	-3.00938	0.00261779	0.07146	Nol4	57014
chr2_51099882_51100383	36.9635	-1.15825	0.384793	-3.01007	0.0026119	0.07146	Rnd3	48729
chr5_35856230_35856731	131.921	0.776991	0.258288	3.00824	0.00262769	0.0716853	Ablim2	-98351
chr8_106704850_106705351	76.8824	0.867653	0.288446	3.00802	0.00262956	0.0716911	Tango6	-21783
chr9_96752571_96753072	68.5489	0.837524	0.278554	3.00668	0.00264113	0.0719613	Zbtb38	0
chr17_9904638_9905139	52.2878	1.00129	0.333043	3.00648	0.00264287	0.0719635	Pabpc6	-234934
chr5_125140790_125141291	171.903	0.568826	0.189219	3.00617	0.00264559	0.0719922	Ncor2	37929
chr10_82662397_82662898	47.5686	-1.08292	0.360275	-3.0058	0.00264881	0.0720346	Glt8d2	27753
chr3_107431184_107431685	115.849	-0.680218	0.226339	-3.00531	0.00265308	0.0720993	Kcnc4	27868
chr8_69936370_69936871	77.4692	0.900848	0.299768	3.00515	0.00265451	0.0720993	Gatad2a	59514
chr14_33549835_33550336	71.374	-0.871997	0.290239	-3.00442	0.00266092	0.0721377	Frmpd2	-78028
chr17_34646810_34647311	263.606	0.471534	0.156927	3.00479	0.00265761	0.0721377	Atf6b	0
chr5_113869159_113869660	35.1408	-1.29442	0.430827	-3.0045	0.0026602	0.0721377	Coro1c	39099
chr17_46104414_46104915	110.001	-0.730746	0.24326	-3.00397	0.00266482	0.0721983	Mrps18a	6071
chr4_150730006_150730507	37.9095	1.08599	0.361608	3.00323	0.00267131	0.0723288	Slc45a1	-77832
chr1_90953710_90954211	78.1396	0.747057	0.248775	3.00294	0.00267386	0.0723528	Prlh	-603
chr5_115186650_115187151	73.9322	-0.877887	0.292379	-3.00256	0.00267715	0.072392	Cabp1	7231
chr6_146357827_146358328	36.6451	1.03684	0.345337	3.00239	0.00267865	0.072392	Itpr2	143851
chr10_19277032_19277533	57.8921	-1.01068	0.336745	-3.00132	0.00268814	0.0724525	Olig3	79000
chr10_84392632_84393133	74.544	0.785227	0.261652	3.00104	0.00269059	0.0724525	Nuak1	47465
chr12_10337475_10337976	49.0945	1.03647	0.345375	3.001	0.00269092	0.0724525	Nt5c1b	31997
chr2_158794441_158794942	254.476	0.487788	0.162524	3.00132	0.00268809	0.0724525	Dhx35	0
chr3_141936500_141937001	165.707	0.641659	0.213782	3.00146	0.00268692	0.0724525	Bmpr1b	232425
chr7_116681280_116682282	42.4921	-1.06972	0.356429	-3.00121	0.00268908	0.0724525	Nucb2	-176912
chr1_187003362_187003863	50.4137	-1.04653	0.3488	-3.00036	0.00269663	0.0724713	D1Pas1	-35947
chr10_57828531_57829032	121.398	0.747594	0.249155	3.00052	0.00269518	0.0724713	Smpdl3a	-34158
chr5_34956972_34957473	88.4039	0.823467	0.274431	3.00063	0.00269419	0.0724713	Rgs12	-7528
chr10_78470767_78471268	116.628	0.665186	0.221798	2.99907	0.00270805	0.0727332	Pdxk	-5792
chr3_143040448_143040949	57.5912	1.07421	0.358234	2.99862	0.00271203	0.0727948	Pkn2	-158444
chr13_53442119_53442620	59.8738	0.891305	0.297257	2.99843	0.00271377	0.0727965	Msx2	30455
chr1_151881140_151881641	39.1627	1.06977	0.356813	2.99813	0.00271645	0.0728234	Edem3	-125770
chr2_158139565_158140066	65.1593	0.819306	0.2733	2.99782	0.00271915	0.0728506	Tgm2	6371
chr8_87689105_87689606	40.9338	-1.09547	0.365487	-2.99729	0.00272394	0.0729341	Zfp423	269990
chr11_88607853_88608354	80.6618	0.827217	0.276022	2.99693	0.00272717	0.0729754	Msi2	109829
chr11_69094813_69095314	420.233	0.387518	0.129354	2.9958	0.00273725	0.0729796	Per1	0
chr2_92704013_92704514	32.4351	-1.17711	0.392851	-2.99633	0.00273248	0.0729796	Chst1	-104307
chr3_8731413_8731914	37.4039	-1.15933	0.386883	-2.99659	0.00273018	0.0729796	Hey1	-64157
chr3_104058937_104059438	45.8269	-1.11979	0.37379	-2.99578	0.00273743	0.0729796	Magi3	160937
chr8_119819291_119819792	66.5027	0.866351	0.289183	2.99586	0.00273674	0.0729796	Cotl1	20753
chr9_49915296_49915797	55.1212	0.89952	0.300197	2.99643	0.00273164	0.0729796	Ncam1	-116371
chr13_3782531_3783032	56.3631	0.934337	0.31201	2.99458	0.00274825	0.0731247	Calml3	21285
chr6_99666802_99667303	117.457	-0.734126	0.245164	-2.99443	0.00274962	0.0731247	RP23-133N21.3	-5
chr6_100884815_100885316	43.6848	-1.06428	0.35541	-2.99451	0.00274886	0.0731247	Ppp4r2	-51194
chr7_46835138_46835639	102.27	0.780945	0.260751	2.99498	0.00274459	0.0731247	Ldha	10200
chr8_127706358_127706859	210.333	-0.623772	0.20833	-2.99416	0.00275202	0.0731436	Pard3	-642466
chr1_191896672_191897173	34.8559	-1.32498	0.442738	-2.9927	0.00276525	0.0734053	Slc30a1	9594
chr3_142310439_142310940	67.7942	0.889135	0.297095	2.99277	0.00276462	0.0734053	Pdlim5	84754
chr4_8684483_8684984	40.7215	-1.13899	0.380634	-2.99236	0.00276833	0.073442	Chd7	6381
chr16_85148639_85149140	44.3697	1.0057	0.336178	2.99158	0.00277537	0.0735288	App	24627
chr2_155642094_155642595	54.7886	-0.95935	0.320699	-2.99144	0.00277669	0.0735288	Trpc4ap	49790
chr7_114027317_114027818	29.7984	-1.293	0.432189	-2.99175	0.00277383	0.0735288	Spon1	-261320
chr2_127757093_127757594	52.0052	-0.995368	0.332765	-2.9912	0.0027788	0.0735399	Nphp1	31304
chr1_166379000_166379501	358.92	0.482362	0.161298	2.99051	0.00278512	0.0736622	Tada1	0
chr11_83467198_83467699	35.4358	-1.18111	0.395015	-2.99003	0.00278952	0.0737334	Mmp28	-4206
chr12_3780349_3780850	111.287	0.652408	0.218232	2.98952	0.00279421	0.0738123	Dtnb	-207969
chr12_56877859_56878360	36.1321	1.12232	0.375493	2.98893	0.0027996	0.0738648	Slc25a21	319113
chr9_108104986_108105487	52.1235	-0.981281	0.328289	-2.98907	0.00279824	0.0738648	Bsn	84898
chr12_108232009_108232510	98.9798	0.708554	0.237087	2.98858	0.00280278	0.0738994	Ccdc85c	42916
chr7_101342276_101342777	45.9708	1.01667	0.340204	2.98841	0.00280432	0.0738994	Stard10	-25191
chr17_35549531_35550032	79.4888	0.763281	0.255433	2.98818	0.00280644	0.0739103	Cdsn	2096
chr12_53405828_53406329	116.271	0.743137	0.248784	2.98707	0.00281663	0.0740437	Npas3	-157152
chr14_33885497_33885998	46.7098	1.01497	0.339771	2.9872	0.00281543	0.0740437	Gdf10	37589
chr18_88746903_88747404	60.8891	-1.07344	0.359356	-2.98712	0.00281622	0.0740437	Socs6	146949
chr9_108052813_108053314	88.0143	0.705691	0.236276	2.98672	0.00281984	0.0740833	Amigo3	0
chr9_108052813_108053314.1	88.0143	0.705691	0.236276	2.98672	0.00281984	0.0740833	Rnf123	30033
chr11_88540007_88540508	84.4929	0.760239	0.254567	2.9864	0.00282283	0.0741061	Msi2	177675
chr15_18052685_18053186	65.8152	-1.00543	0.336685	-2.98626	0.00282413	0.0741061	Cdh10	765761
chr6_36931438_36931939	30.8487	-1.39126	0.465969	-2.98574	0.00282895	0.0741877	Dgki	368246
chr15_12518503_12519004	67.3337	0.910312	0.304909	2.98552	0.00283094	0.0741949	Pdzd2	73553
chr1_158161510_158162011	54.4788	1.08314	0.362871	2.98491	0.00283663	0.0742543	Brinp2	194316
chr16_22389058_22389559	59.1745	0.879704	0.294711	2.98497	0.00283604	0.0742543	Etv5	50161
chr4_106749679_106750180	221.696	0.51572	0.17279	2.98466	0.00283898	0.0742709	Acot11	54819
chr1_51650600_51651101	35.0649	-1.35675	0.454674	-2.98399	0.00284512	0.0743361	Nabp1	-172175
chr14_79184996_79185497	60.2983	-0.964589	0.323258	-2.98396	0.00284545	0.0743361	Vwa8	-335945
chr15_99677056_99677557	53.25	-0.959808	0.321669	-2.98383	0.00284662	0.0743361	Asic1	-6689
chr18_73892173_73892674	49.682	1.15809	0.3882	2.98322	0.00285232	0.0743975	Mro	-32789
chr6_100503338_100503839	62.024	-0.85883	0.287887	-2.98321	0.0028524	0.0743975	Shq1	167319
chr7_28436206_28436707	488.147	0.373162	0.125118	2.98249	0.00285917	0.0745293	Samd4b	-15
chr11_77925798_77926299	36.4117	-1.14473	0.383907	-2.9818	0.00286557	0.0746512	Sez6	4501
chr9_24943827_24944328	48.4739	0.97221	0.326127	2.98108	0.00287235	0.074783	Gm10181	145094
chr4_65296962_65297463	69.678	0.901522	0.302484	2.98039	0.00287878	0.0749053	Pappa	-172789
chr10_60820509_60821010	75.4956	-0.916271	0.307563	-2.97913	0.00289066	0.0751694	Unc5b	10572
chr3_57534336_57534837	55.5844	0.944313	0.317101	2.97796	0.00290176	0.0754128	Wwtr1	41074
chr11_113522624_113523125	39.0884	-1.31656	0.44231	-2.97656	0.00291502	0.075576	Slc39a11	42644
chr3_27858956_27859457	36.9063	1.04301	0.350368	2.97689	0.00291192	0.075576	Tmem212	36912
chr3_121636343_121636844	86.977	0.834662	0.280371	2.97699	0.00291094	0.075576	RP24-131O15.1	33918
chr9_60456601_60457102	40.57	-1.21506	0.408207	-2.97658	0.00291485	0.075576	Thsd4	53934
chr1_136143418_136143919	89.5004	0.807129	0.271197	2.97617	0.00291871	0.075611	Kif21b	-12030
chr10_61232778_61233279	98.2672	0.69545	0.233703	2.97578	0.0029224	0.075611	Adamts14	40160
chr11_87816770_87817271	89.8945	-0.803984	0.270188	-2.97564	0.00292375	0.075611	Lpo	8843
chr13_64312423_64312924	220.993	0.493566	0.165883	2.97539	0.00292616	0.075611	Aaed1	0
chr3_35222231_35222732	34.0869	1.3248	0.445262	2.97532	0.00292683	0.075611	Atp11b	531402
chr8_13692317_13692818	54.2411	-0.981388	0.3298	-2.97571	0.00292311	0.075611	RP23-20K21.1	13071
chr11_50154810_50155311	45.5772	1.08551	0.364909	2.97475	0.00293232	0.0756552	Tbc1d9b	-23415
chr11_50403257_50403758	62.4762	0.89923	0.302271	2.97491	0.00293075	0.0756552	Rufy1	27368
chr8_80738217_80738718	91.0485	-0.721957	0.242708	-2.97459	0.00293378	0.0756552	Smarca5	780
chr5_13547456_13547957	46.0883	1.02453	0.344451	2.97438	0.00293584	0.0756632	Sema3a	-150673
chr12_80062592_80063093	220.972	0.591892	0.199036	2.9738	0.00294135	0.0757252	Zfp36l1	49921
chr13_37923605_37924106	41.2007	0.997502	0.335496	2.97322	0.00294697	0.0757252	Rreb1	-97568
chr17_26582247_26582748	108.882	0.649722	0.218522	2.97325	0.00294662	0.0757252	Ergic1	-20759
chr5_110770592_110771093	673.687	0.380654	0.128025	2.97327	0.00294645	0.0757252	Ep400	0
chr7_78620045_78620546	88.2371	-0.789594	0.265522	-2.97374	0.00294193	0.0757252	Ntrk3	-41637
chr11_116218650_116219151	170.518	0.566391	0.19054	2.97256	0.00295327	0.075797	Evpl	18927
chr2_44535792_44536293	45.6171	-1.13597	0.38213	-2.97274	0.00295157	0.075797	Gtdc1	325330
chr18_49398569_49399070	56.7649	1.04167	0.350481	2.97212	0.0029575	0.0758203	Dtwd2	356532
chr4_62998384_62998885	69.8424	0.874549	0.294253	2.9721	0.00295767	0.0758203	Zfp618	-32812
chr17_80710129_80710630	139.209	-0.68184	0.229481	-2.97122	0.00296621	0.0759942	Map4k3	17464
chr1_92061120_92061621	62.0229	0.888962	0.299226	2.97087	0.00296956	0.0760001	Hdac4	118721
chr1_125242277_125242778	37.5567	-1.24952	0.420647	-2.97048	0.00297336	0.0760001	Actr3	192770
chr2_122306112_122306613	76.941	0.779753	0.262502	2.97047	0.00297345	0.0760001	Duoxa1	7081
chr4_128609897_128610398	257.43	0.468924	0.15785	2.97069	0.00297134	0.0760001	Zscan20	0
chr16_77058576_77059077	54.3826	-1.05	0.35354	-2.96995	0.00297853	0.0760849	Usp25	-44508
chr3_68821788_68822289	153.396	0.673711	0.226879	2.96947	0.00298313	0.0761576	RP24-399B3.5	47297
chr3_69406231_69406732	90.9129	0.82888	0.279256	2.96817	0.00299576	0.076435	Ppm1l	-89371
chr1_73538506_73539007	83.1557	0.821596	0.276845	2.96771	0.00300027	0.0764601	Tnp1	-522597
chr8_127985654_127986155	44.4543	-1.0984	0.370094	-2.96789	0.00299854	0.0764601	Nrp1	373129
chr4_140929716_140930217	190.128	0.645786	0.217619	2.96752	0.00300217	0.0764635	Padi2	-23373
chr5_116443464_116443965	62.7341	-0.885963	0.298619	-2.96687	0.00300849	0.0765797	Srrm4	147853
chr8_128340509_128341010	57.4446	0.94254	0.31772	2.96658	0.00301137	0.0766079	Nrp1	18274
chr5_114753314_114753815	86.2505	-0.891868	0.300686	-2.96611	0.00301588	0.0766777	Git2	19681
chr9_113737929_113738430	74.5373	0.761194	0.256648	2.96591	0.00301792	0.0766844	Clasp2	3043
chr17_9845707_9846208	41.4626	1.06161	0.358	2.96538	0.00302307	0.0767255	Pabpc6	-176003
chr3_25689047_25689548	39.0273	-1.16193	0.391833	-2.96538	0.00302305	0.0767255	Nlgn1	642913
chr5_32135644_32136145	186.696	0.524029	0.176756	2.9647	0.00302975	0.0768499	Fosl2	0
chr10_62173031_62173532	49.7703	0.920865	0.310837	2.96254	0.00305117	0.0772576	RP23-459M2.1	-33161
chr4_87819052_87819553	33.4268	-1.38342	0.466945	-2.96271	0.00304948	0.0772576	Mllt3	213812
chr5_140715781_140716282	43.5416	1.08569	0.366442	2.96278	0.00304877	0.0772576	Brat1	-10771
chr11_106154000_106154501	48.0659	-1.12551	0.379984	-2.96198	0.00305668	0.0773351	Map3k3	-69388
chr14_33694145_33694646	184.821	0.86914	0.293443	2.96187	0.0030578	0.0773351	Ptpn20	-104939
chr6_48803354_48803855	41.3395	1.07573	0.36324	2.96148	0.00306164	0.0773872	Gimap3	-32503
chr13_29759676_29760177	60.2863	-0.973172	0.328644	-2.96117	0.0030647	0.0773882	Cdkal1	95498
chr2_30265716_30266217	106.037	0.713483	0.240969	2.9609	0.00306744	0.0773882	Phyhd1	0
chr2_30265716_30266217.1	106.037	0.713483	0.240969	2.9609	0.00306744	0.0773882	RP23-395P6.10	-25150
chr2_85173452_85173953	30.2423	-1.36816	0.46214	-2.9605	0.00307144	0.0773882	Lrrc55	22747
chr4_86189763_86190264	44.3613	1.09692	0.370519	2.96049	0.00307146	0.0773882	Adamtsl1	-135841
chr4_138635645_138636146	141.561	-0.644762	0.217809	-2.96022	0.00307418	0.0773882	Vwa5b1	-11633
chr6_39493039_39493540	62.9735	0.958397	0.323663	2.9611	0.00306544	0.0773882	Dennd2a	64328
chr7_132720480_132720981	46.231	-1.06834	0.360888	-2.96031	0.0030733	0.0773882	Fam53b	92906
chr7_132720480_132720981.1	46.231	-1.06834	0.360888	-2.96031	0.0030733	0.0773882	Fgfr2	402370
chr2_146221193_146221694	51.3062	-0.988937	0.334126	-2.95977	0.00307866	0.0774435	Insm1	227
chr9_79346286_79346787	64.0235	-0.940279	0.3177	-2.95964	0.00307995	0.0774435	Col12a1	371934
chr1_172061134_172061635	51.2588	-1.08408	0.366311	-2.95945	0.0030819	0.0774477	Nhlh1	-3561
chr9_14596368_14596869	59.5443	0.851242	0.287656	2.95924	0.00308403	0.0774563	Amotl1	48188
chr3_36481738_36482239	59.9828	0.870094	0.294045	2.95905	0.0030859	0.0774585	RP23-165D1.1	-5802
chr18_60729985_60730486	113.171	0.750138	0.253572	2.95828	0.00309358	0.0776044	Ndst1	-16596
chr2_129576649_129577150	58.2903	0.900019	0.304255	2.95811	0.0030953	0.0776044	Sirpa	15764
chr11_20878642_20879143	58.5556	-0.914636	0.309535	-2.95487	0.00312803	0.0783431	Lgalsl	-47586
chr8_13705587_13706088	165.777	0.556503	0.188336	2.95483	0.00312838	0.0783431	RP23-20K21.1	0
chr9_62559949_62560450	41.3289	1.03447	0.350141	2.95443	0.00313246	0.0784001	Coro2b	-22905
chr6_100197103_100197604	124.631	-0.670992	0.2272	-2.95331	0.0031439	0.0786411	Rybp	89882
chr12_69843498_69843999	54.575	0.956709	0.324032	2.95251	0.00315202	0.0787987	Map4k5	49202
chr11_18580979_18581480	162.878	-0.661779	0.224211	-2.95159	0.00316141	0.0789633	Meis1	437506
chr19_46215408_46215909	36.1491	1.20186	0.407226	2.95133	0.00316407	0.0789633	Gbf1	-62900
chr7_143784959_143785460	33.6062	-1.18134	0.400257	-2.95146	0.00316272	0.0789633	Mrgpre	-459
chr11_109125427_109125928	32.2779	1.1827	0.400784	2.95097	0.00316781	0.0790112	RP23-391H8.1	18442
chr7_44815656_44816157	221.233	0.508856	0.172452	2.95071	0.00317043	0.0790311	Atf5	502
chr7_44815656_44816157.1	221.233	0.508856	0.172452	2.95071	0.00317043	0.0790311	Nup62	0
chr14_76598880_76599381	45.8196	-1.02905	0.348774	-2.95048	0.00317278	0.0790442	Serp2	-42178
chr2_147338699_147339200	110.103	-0.74619	0.252944	-2.95002	0.00317756	0.0791177	Pax1	25794
chr10_92837628_92838129	134.425	0.700658	0.237532	2.94975	0.00318035	0.0791418	Cfap54	243490
chr8_88623259_88623760	36.2668	-1.10308	0.374187	-2.94793	0.00319907	0.0795619	Snx20	12369
chr13_43767187_43767688	72.2559	0.815801	0.27676	2.94768	0.00320164	0.0795802	Cd83	17087
chr10_81545081_81545582	502.754	0.385038	0.130632	2.9475	0.00320354	0.0795819	Gna11	0
chr10_93833511_93834012	68.9369	-0.835657	0.283633	-2.94626	0.00321642	0.0796883	Usp44	-1957
chr13_29196827_29197328	73.9006	0.899266	0.305221	2.94628	0.00321617	0.0796883	Sox4	-243114
chr16_18119023_18119524	51.6214	-0.934793	0.31734	-2.94572	0.00322205	0.0796883	Rtn4r	8118
chr17_49126443_49126944	51.9119	1.08248	0.367504	2.9455	0.00322437	0.0796883	Lrfn2	-194065
chr19_48240936_48241437	40.2164	1.09377	0.37132	2.94561	0.00322315	0.0796883	Sorcs3	-34912
chr2_145981556_145982057	33.5722	-1.32084	0.448319	-2.9462	0.00321701	0.0796883	Crnkl1	-46542
chr3_146641965_146642466	42.773	1.03241	0.350464	2.94584	0.00322077	0.0796883	AC114618.3	8852
chr6_55680969_55681470	37.1923	-1.12223	0.380841	-2.94672	0.00321167	0.0796883	Neurod6	0
chr9_37750305_37750806	43.0644	-1.21977	0.414018	-2.94618	0.00321729	0.0796883	Olfr874	-5200
chr2_165900221_165900722	38.8154	1.04846	0.355985	2.94523	0.00322717	0.0797119	Zmynd8	-3271
chr16_22789824_22790325	54.5814	-0.927736	0.315047	-2.94475	0.00323211	0.0797886	Crygs	21086
chr13_103806166_103806667	76.7849	-0.79905	0.271373	-2.94447	0.00323508	0.0797931	Srek1	-31558
chr15_88977672_88978173	33.1893	1.12362	0.381698	2.94373	0.00324283	0.0797931	Mlc1	835
chr17_43557473_43557974	127.966	0.688784	0.233944	2.94422	0.00323769	0.0797931	Pla2g7	10295
chr17_83235171_83235672	47.2505	-1.03593	0.351895	-2.94386	0.00324149	0.0797931	Pkdcc	-19880
chr4_21685594_21686095	68.0527	-0.918346	0.311941	-2.94398	0.00324025	0.0797931	Prdm13	0
chr5_123993302_123993803	133.127	0.601465	0.204324	2.94368	0.00324334	0.0797931	Hip1r	-19675
chr14_29179067_29179568	80.3659	0.769492	0.261424	2.94346	0.00324565	0.0798047	Cacna2d3	542297
chr1_75443261_75443762	39.3992	-1.05092	0.357302	-2.94127	0.0032687	0.0798451	Asic4	6674
chr11_112327449_112327950	36.9211	1.13572	0.386026	2.94209	0.0032601	0.0798451	Sox9	454274
chr13_41339784_41340285	141.404	0.620276	0.210911	2.94094	0.00327215	0.0798451	Nedd9	147009
chr14_78007986_78008487	44.8774	-1.02429	0.348311	-2.94073	0.00327442	0.0798451	Fam216b	80521
chr17_25433670_25434171	84.9712	0.764434	0.259825	2.94211	0.00325982	0.0798451	Cacna1h	0
chr4_59825569_59826070	45.8786	-0.981001	0.333597	-2.94068	0.00327492	0.0798451	Snx30	-19730
chr4_71517820_71518321	93.5852	-0.74427	0.253	-2.94177	0.00326339	0.0798451	RP24-168J7.2	239645
chr4_114611441_114611942	36.3063	-1.18297	0.402225	-2.94107	0.0032708	0.0798451	Trabd2b	-204718
chr4_130022957_130023458	57.1971	0.854955	0.290596	2.94207	0.00326023	0.0798451	Col16a1	24382
chr4_140714006_140714507	248.023	0.48778	0.165868	2.94076	0.00327404	0.0798451	Rcc2	-13466
chr5_134551431_134551932	67.4335	-0.822732	0.279757	-2.94088	0.00327287	0.0798451	Clip2	503
chr6_128349664_128350165	131.927	0.689268	0.234213	2.94291	0.00325147	0.0798451	Tulp3	5687
chr7_45568025_45568526	143.999	0.561414	0.19083	2.94196	0.00326142	0.0798451	Bcat2	1627
chr8_91676895_91677396	54.3514	-1.00296	0.340998	-2.94124	0.00326899	0.0798451	Irx3	124672
chr9_107255576_107256077	54.7177	-0.981803	0.333829	-2.94104	0.00327116	0.0798451	Mapkapk3	33801
chr15_82968355_82968856	82.41	-0.772458	0.262756	-2.93983	0.00328387	0.0800183	Tcf20	-56221
chr1_177646113_177646614	78.8565	-0.899131	0.305946	-2.93886	0.00329424	0.0802259	AC115818.1	83200
chr13_84404523_84405024	181.897	-0.627258	0.213465	-2.93845	0.00329853	0.0802852	Tmem161b	-182224
chr2_31119776_31120277	68.201	0.841575	0.286521	2.93722	0.00331174	0.0805615	Fnbp1	21732
chr9_49792620_49793121	32.756	1.21498	0.413706	2.93683	0.0033159	0.0806175	Ncam1	5805
chr11_103666170_103666671	87.5865	-0.783918	0.266944	-2.93663	0.00331795	0.080622	Rprml	-16601
chr4_69628871_69629372	36.763	1.14048	0.388425	2.93617	0.00332291	0.0806974	Brinp1	-674474
chr1_128585767_128586268	103.001	0.707485	0.240976	2.93592	0.0033256	0.0807174	Cxcr4	6023
chr7_24884113_24884614	501.217	0.400802	0.136551	2.93518	0.00333359	0.0808662	Rps19	0
chr5_140768297_140768798	121.402	0.647224	0.22057	2.93432	0.00334275	0.081043	Gna12	61634
chr5_112368671_112369172	106.703	-0.70745	0.241224	-2.93275	0.00335976	0.08141	Hps4	-25589
chr2_170791548_170792049	54.804	0.922154	0.314471	2.9324	0.00336355	0.0814563	Dok5	-59742
chr1_52149949_52150450	63.7047	-0.997675	0.340259	-2.93211	0.00336669	0.0814701	Stat1	-30460
chr5_99775238_99775739	31.5425	-1.23836	0.42236	-2.932	0.00336788	0.0814701	Rasgef1b	-46176
chr6_53855118_53855619	109.914	0.687655	0.234556	2.93172	0.00337085	0.0814965	Tril	-34288
chr6_31277764_31278265	57.5357	0.916254	0.312565	2.9314	0.00337435	0.0815356	Mkln1	120470
chr1_92035813_92036314	53.8107	0.96019	0.327694	2.93014	0.00338812	0.0817659	Hdac4	144028
chr14_101327346_101327847	70.9755	-0.790235	0.269738	-2.92964	0.00339356	0.0817659	Prr30	-127016
chr15_77306772_77307273	374.239	0.408398	0.139409	2.92949	0.0033952	0.0817659	Rbfox2	0
chr16_72510887_72511388	54.8965	-1.07567	0.367124	-2.93	0.0033896	0.0817659	Robo1	151761
chr4_100683666_100684167	42.4175	1.13181	0.386317	2.92974	0.00339245	0.0817659	Cachd1	92508
chr4_141793327_141793828	315.385	0.468657	0.15996	2.92983	0.00339147	0.0817659	Casp9	0
chr19_21784341_21784842	94.7991	-0.844236	0.28823	-2.92903	0.00340017	0.08184	Tmem2	-6000
chr4_45789241_45789742	32.839	-1.14768	0.391859	-2.92882	0.00340251	0.0818509	Aldh1b1	9280
chr13_93839013_93839514	31.7272	-1.32249	0.451589	-2.92853	0.00340571	0.0818825	arsb	-67384
chr3_57972412_57972913	124.88	0.689173	0.23535	2.92829	0.00340829	0.0818991	Pfn2	-124333
chr10_60362201_60362702	31.3706	-1.21238	0.414203	-2.92703	0.00342215	0.0821412	Cdh23	294632
chr10_60362201_60362702.1	31.3706	-1.21238	0.414203	-2.92703	0.00342215	0.0821412	Vsir	-15351
chr18_42723921_42724422	151.174	0.638535	0.21814	2.92718	0.00342051	0.0821412	Ppp2r2b	335050
chr8_84684410_84684911	54.0232	1.01461	0.346727	2.92624	0.00343091	0.0823058	Nacc1	2952
chr19_6519431_6519932	56.7621	0.887164	0.303215	2.92586	0.00343506	0.0823141	Nrxn2	-21597
chr2_31962405_31962906	158.172	0.608402	0.207937	2.92589	0.00343476	0.0823141	Aif1l	-12267
chr1_155209923_155210424	202.213	-0.583291	0.199397	-2.92527	0.00344156	0.0823961	RP23-320I7.1	34021
chr14_118231786_118232287	82.5589	0.785482	0.268522	2.92521	0.00344228	0.0823961	Sox21	4744
chr3_41021867_41022368	112.629	0.685428	0.234418	2.92396	0.00345614	0.0826823	Pgrmc2	60679
chr15_31768945_31769446	35.3752	-1.10329	0.377409	-2.92333	0.00346309	0.0828028	Fam173b	-166828
chr1_68178526_68179027	45.7175	-1.18094	0.404004	-2.92308	0.00346588	0.0828227	Erbb4	929033
chr15_91703221_91703722	120.725	0.72447	0.247859	2.92291	0.00346774	0.0828227	Lrrk2	-30047
chr5_149428255_149428756	54.0074	-0.999215	0.341887	-2.92265	0.00347065	0.0828464	Medag	-16507
chr11_117275925_117276426	87.3414	0.698098	0.238899	2.92215	0.00347626	0.0828635	2009-09-01	-76265
chr14_62226540_62227041	141.671	0.719684	0.246292	2.92207	0.0034771	0.0828635	Dleu7	65923
chr4_140038032_140038533	41.1702	1.04334	0.357022	2.92234	0.0034741	0.0828635	Igsf21	208252
chr9_63706203_63706704	112.854	0.779425	0.266798	2.92141	0.00348456	0.0829957	Smad3	51291
chr4_59823444_59823945	54.7745	-0.996452	0.34116	-2.92077	0.00349165	0.083119	Snx30	-17605
chr10_14082236_14082737	71.9747	-0.966891	0.331092	-2.92031	0.00349679	0.0831956	Hivep2	-116162
chr7_74386154_74386655	31.8442	-1.18301	0.40512	-2.92014	0.00349871	0.0831956	Slco3a1	168126
chr11_36072983_36073484	61.865	-0.948405	0.324838	-2.91962	0.00350455	0.0831969	Tenm2	1162399
chr4_64483401_64483902	45.2042	1.03035	0.352926	2.91945	0.00350644	0.0831969	Tnc	-462676
chr4_128841179_128841680	38.8384	1.00363	0.343755	2.9196	0.00350484	0.0831969	Zfp362	-35134
chr7_29393271_29393772	201.092	-0.610695	0.209146	-2.91994	0.00350096	0.0831969	Sipa1l3	111689
chr5_125268349_125268850	191.84	0.537222	0.184088	2.9183	0.00351947	0.0834604	Scarb1	72245
chr19_58822324_58822825	67.9139	-0.878803	0.301231	-2.91737	0.00352997	0.0836177	Hspa12a	38160
chr9_34939500_34940001	58.7681	-0.88026	0.301727	-2.91741	0.00352955	0.0836177	Kirrel3	-450768
chr3_55447844_55448345	69.7932	0.882781	0.302656	2.91678	0.00353661	0.0837295	Dclk1	-205481
chr1_6729127_6729628	76.9246	-0.872217	0.299154	-2.91561	0.00354992	0.0839986	St18	-241897
chr9_37460382_37460883	55.77	-0.90464	0.310301	-2.91537	0.00355272	0.0840191	Robo3	-27136
chr1_194578239_194578740	86.0236	-0.869444	0.298525	-2.91246	0.00358592	0.0840321	Plxna2	41085
chr10_80329744_80330245	359.4	0.422366	0.145038	2.9121	0.00359011	0.0840321	Reep6	0
chr11_96946494_96946995	31.9692	1.1464	0.393273	2.91502	0.00355668	0.0840321	Pnpo	-2508
chr11_105031021_105031522	43.7207	1.08503	0.372413	2.9135	0.00357396	0.0840321	Efcab3	60684
chr11_107341286_107341787	156.022	0.576123	0.197715	2.91391	0.00356935	0.0840321	Pitpnc1	128913
chr12_31973416_31973917	51.8713	-1.0201	0.350142	-2.9134	0.00357522	0.0840321	Prkar2b	87380
chr13_54824311_54824812	85.2025	-0.779987	0.267695	-2.91372	0.00357152	0.0840321	Tspan17	-34935
chr14_30650863_30651364	90.9539	0.752677	0.258398	2.91286	0.00358134	0.0840321	Rft1	2996
chr15_78913564_78914065	299.875	0.419314	0.143961	2.91269	0.0035833	0.0840321	Pdxp	0
chr15_78913564_78914065.1	299.875	0.419314	0.143961	2.91269	0.0035833	0.0840321	RP23-305P10.8	-13898
chr17_70633520_70634021	220.913	0.630334	0.216391	2.91294	0.00358047	0.0840321	Dlgap1	-664448
chr17_72015215_72015716	36.5991	-1.09716	0.376476	-2.91428	0.00356511	0.0840321	Alk	587994
chr19_55122913_55123414	130.496	0.74479	0.255745	2.91223	0.00358854	0.0840321	Gpam	-23462
chr2_153593104_153593605	147.29	-0.657471	0.22569	-2.91316	0.00357793	0.0840321	Commd7	39177
chr3_152145105_152145606	130.573	0.721411	0.247535	2.91438	0.00356392	0.0840321	Gipc2	20625
chr4_141623667_141624168	88.3024	0.711053	0.244006	2.91408	0.00356739	0.0840321	Slc25a34	0
chr6_112210458_112210959	228.222	0.597602	0.205182	2.91255	0.00358489	0.0840321	Lmcd1	62799
chr8_93813301_93813802	170.643	0.576823	0.19789	2.91486	0.00355846	0.0840321	Gnao1	-2464
chr8_93980169_93980670	42.8167	1.02151	0.35076	2.91229	0.00358788	0.0840321	Amfr	32173
chr9_20776249_20776750	37.8033	1.15346	0.39588	2.91367	0.0035721	0.0840321	Col5a3	38318
chr8_13512578_13513079	34.0598	-1.17181	0.402424	-2.91187	0.00359269	0.0840473	Gas6	-18088
chr13_51526401_51526902	48.1995	1.03345	0.354965	2.91141	0.00359797	0.08408	Shc3	40183
chr17_28244698_28245199	76.9418	0.781086	0.268282	2.91144	0.00359764	0.08408	Ppard	-11945
chr5_114949275_114949776	47.5922	-0.989251	0.33987	-2.91067	0.00360652	0.084189	Hnf1a	21292
chr5_114949275_114949776.1	47.5922	-0.989251	0.33987	-2.91067	0.00360652	0.084189	RP24-297N9.8	-7118
chr8_96680505_96681006	32.2387	-1.40447	0.482518	-2.91071	0.00360613	0.084189	Got2	-791958
chr10_8499425_8499926	43.17	1.00606	0.3457	2.91022	0.00361178	0.0842665	Ust	18900
chr1_97553607_97554108	181.469	0.675473	0.232156	2.90956	0.00361932	0.0843361	AC099860.1	107967
chr14_15722087_15722588	51.5978	0.993729	0.341517	2.90975	0.00361719	0.0843361	Lrrc3b	-283100
chr3_108121152_108121653	32.2157	-1.37675	0.473205	-2.90941	0.00362114	0.0843361	Gnai3	24494
chr4_66515793_66516294	30.5634	-1.26133	0.433554	-2.90929	0.00362255	0.0843361	Astn2	-111310
chr2_152055408_152055909	36.7544	-1.19571	0.41109	-2.90864	0.00363007	0.0844658	Scrt2	25620
chr1_185493566_185494067	144.077	0.633152	0.217735	2.9079	0.00363859	0.0845733	Slc30a10	-38719
chr7_81478186_81478687	38.4259	-1.17289	0.403334	-2.90799	0.00363761	0.0845733	Ap3b2	15239
chr2_127722471_127722972	70.8356	0.764669	0.263096	2.90642	0.0036559	0.0849302	Mall	6961
chr2_154677687_154678188	150.07	0.594096	0.204428	2.90614	0.0036592	0.0849613	Chmp4b	-20670
chr2_162391834_162392335	85.1859	0.774367	0.266482	2.90589	0.00366212	0.0849836	Ptprt	268813
chr16_96249524_96250025	68.434	-0.804177	0.276775	-2.90552	0.0036664	0.0849918	B3galt5	-13724
chr8_85386186_85386687	57.8891	0.910184	0.313259	2.90553	0.00366629	0.0849918	Mylk3	-5208
chr7_141934445_141934946	96.5756	-0.831394	0.286178	-2.90517	0.00367056	0.0850429	Brsk2	14805
chr11_103267329_103267830	452.122	0.394442	0.135811	2.90434	0.00368034	0.0851783	Map3k14	0
chr14_60643076_60643577	61.1162	0.86877	0.299128	2.90434	0.00368025	0.0851783	Spata13	-8834
chr2_165266158_165266659	39.8184	1.09957	0.378645	2.90396	0.00368478	0.0852356	Slc35c2	21211
chr13_107700283_107700784	200.351	0.601762	0.207241	2.90369	0.00368797	0.0852518	Smim15	343662
chr16_93246693_93247194	129.632	0.694814	0.239297	2.90356	0.00368942	0.0852518	Setd4	356610
chr10_61388940_61389441	66.3147	0.849661	0.292659	2.90325	0.00369314	0.0852633	Pald1	-5410
chr7_139104030_139104531	66.7508	-0.848316	0.292202	-2.90319	0.00369385	0.0852633	Stk32c	108777
chr2_136713227_136713728	51.8181	-0.939897	0.323793	-2.90277	0.00369877	0.0853316	Snap25	0
chr5_24657092_24657593	32.141	-1.2287	0.423385	-2.90208	0.00370689	0.0854734	Nub1	27939
chr7_144581455_144581956	120.927	0.602125	0.207516	2.90159	0.00371275	0.085563	Fadd	508
chr15_84697580_84698081	82.5404	0.719036	0.247849	2.90111	0.00371845	0.0856487	Prr5	-27961
chr11_4678620_4679121	38.2451	-1.08833	0.375331	-2.89966	0.00373574	0.0857268	Ascc2	-40874
chr15_77036631_77037132	72.6838	0.80783	0.27857	2.89992	0.00373259	0.0857268	Mb	13539
chr15_78383773_78384274	102.755	0.699311	0.24116	2.89978	0.00373423	0.0857268	Tex33	11639
chr19_34290381_34290882	60.0264	0.860391	0.29671	2.89977	0.00373431	0.0857268	Fas	0
chr4_82399930_82400932	107.506	-0.693609	0.239231	-2.89933	0.00373963	0.0857268	Nfib	104839
chr5_16265378_16265879	46.3424	-1.10241	0.380162	-2.89985	0.00373341	0.0857268	Cacna2d1	-330591
chr5_115300813_115301314	294.104	0.458303	0.158046	2.89981	0.0037339	0.0857268	Dynll1	0
chr6_107999237_107999738	43.9036	-1.17093	0.403845	-2.89946	0.00373804	0.0857268	Setmar	65307
chr6_118284057_118284558	49.6819	-1.05641	0.364354	-2.8994	0.00373873	0.0857268	Ret	-86339
chr12_52396446_52396947	48.7116	-1.0326	0.35622	-2.89877	0.0037463	0.0857436	Arhgap5	107069
chr3_135516772_135517273	38.0422	-1.13787	0.392523	-2.89886	0.0037452	0.0857436	Manba	-31162
chr5_140767703_140768204	129.01	0.599604	0.20683	2.89901	0.00374338	0.0857436	Gna12	62228
chr8_94561144_94561645	84.3721	0.756269	0.260934	2.89831	0.00375178	0.0858238	Cpne2	-28155
chr1_185454568_185455069	85.2807	0.711748	0.245591	2.8981	0.00375432	0.0858364	Slc30a10	0
chr13_107646051_107646552	71.7984	0.788557	0.272232	2.89663	0.00377194	0.08613	Smim15	397894
chr14_67756069_67756570	52.7956	-0.935252	0.322887	-2.89653	0.00377312	0.08613	Dock5	176863
chr17_93409234_93409735	39.166	-1.20233	0.41509	-2.89655	0.00377293	0.08613	Adcyap1	-209813
chr14_121172548_121173049	30.1874	-1.30501	0.450707	-2.89548	0.0037858	0.086374	Farp1	-136985
chr2_32201514_32202015	113.82	0.645012	0.222806	2.89495	0.00379223	0.0864751	Prrc2b	-50433
chr1_157969626_157970127	51.0875	0.978946	0.338187	2.89469	0.00379534	0.0865006	Brinp2	386200
chr10_83062269_83062770	64.2879	-0.935755	0.323349	-2.89395	0.00380431	0.0866594	Chst11	-76772
chr12_87147344_87147845	336.514	0.39913	0.137929	2.89375	0.00380673	0.0866691	Gstz1	-180
chr12_87147344_87147845.1	336.514	0.39913	0.137929	2.89375	0.00380673	0.0866691	Pomt2	58
chr1_93220735_93221236	113.514	0.702303	0.242751	2.8931	0.00381457	0.0868019	Crocc2	-52011
chr1_161999894_162000395	136.22	0.67547	0.233564	2.89202	0.00382778	0.0869503	Dnm3	477640
chr11_40510418_40510919	31.8675	-1.33237	0.460722	-2.89192	0.003829	0.0869503	Mat2b	184285
chr14_33888508_33889009	109.988	0.702769	0.242981	2.89227	0.00382465	0.0869503	Gdf10	34578
chr9_44072580_44073081	85.5747	0.76489	0.264493	2.89191	0.00382911	0.0869503	RP24-329C11.10	40420
chr9_44072580_44073081.1	85.5747	0.76489	0.264493	2.89191	0.00382911	0.0869503	Usp2	-5560
chr2_173251041_173251542	63.1682	0.844502	0.292043	2.89171	0.00383153	0.0869597	Pmepa1	24992
chr16_30157653_30158154	64.0109	0.866418	0.299652	2.89141	0.0038352	0.0869975	Hes1	-92314
chr5_124019270_124019771	101.575	0.682244	0.23597	2.89123	0.00383733	0.0870002	Vps37b	12500
chr5_112382897_112383398	73.9672	0.820402	0.283774	2.89104	0.00383969	0.0870083	Asphd2	8816
chr10_42879266_42879767	32.7302	-1.22165	0.422692	-2.89017	0.00385033	0.0870149	Scml4	-18897
chr15_78140265_78140766	40.1636	1.02944	0.356203	2.89003	0.00385203	0.0870149	Cacng2	-20237
chr3_137110372_137110873	47.1437	-1.06778	0.369371	-2.89081	0.00384251	0.0870149	Emcn	230194
chr4_91239065_91239566	40.8257	-1.16073	0.401575	-2.89045	0.00384696	0.0870149	Elavl2	160419
chr4_119633285_119633786	53.4322	-0.97959	0.338883	-2.89064	0.00384455	0.0870149	Guca2a	3918
chr7_66812719_66813220	30.2888	1.27294	0.440432	2.89022	0.00384975	0.0870149	Cers3	-69216
chr12_86793813_86794314	91.3603	0.733834	0.254101	2.88796	0.00387751	0.0873615	Lrrc74a	-59445
chr14_122401829_122402330	43.207	1.06734	0.369643	2.88747	0.00388349	0.0873615	Clybl	-220126
chr17_12759663_12760164	33.3435	-1.29091	0.447053	-2.8876	0.00388195	0.0873615	Igf2r	9501
chr17_87050386_87050887	61.3131	0.848094	0.293645	2.88816	0.00387505	0.0873615	Cript	-24837
chr5_23964606_23965107	71.5186	0.863676	0.29905	2.88806	0.00387624	0.0873615	Fam126a	65584
chr5_111554992_111555493	144.807	0.674946	0.233713	2.88792	0.00387794	0.0873615	Mn1	-137551
chr5_124137973_124138474	94.4317	0.74783	0.258973	2.88767	0.00388104	0.0873615	Pitpnm2	111287
chr7_45704675_45705176	287.848	0.454228	0.157288	2.88787	0.00387864	0.0873615	Car11	-4833
chr7_45704675_45705176.1	287.848	0.454228	0.157288	2.88787	0.00387864	0.0873615	Dbp	0
chr1_170665161_170665662	55.6183	-0.927514	0.321259	-2.88712	0.00388782	0.0874135	Olfml2b	-20630
chr11_96168947_96169448	36.7517	-1.17488	0.407008	-2.88664	0.0038938	0.0874883	Hoxb13	24868
chr17_27456323_27456824	58.9752	-0.893182	0.309432	-2.88652	0.00389531	0.0874883	Grm4	56518
chr5_35827075_35827576	344.015	0.513866	0.178032	2.88636	0.00389721	0.0874883	Ablim2	-69196
chr17_29993468_29993969	41.9596	-1.18434	0.410365	-2.88607	0.00390086	0.0875251	Zfand3	11118
chr1_172173110_172173611	61.9537	0.874047	0.303002	2.88462	0.00391884	0.0877921	Dcaf8	-24993
chr14_25765905_25766406	148.287	0.631456	0.2189	2.88468	0.0039181	0.0877921	Zcchc24	2634
[truncated: 63,536 more rows]
